# Supplementary material for: Damage-responsive elements in Drosophila regeneration
Source: PubMed Central journal article supplement (PMC6280756; doi:10.1101/gr.233098.117), 2018-12
Supplement: supp_gr.233098.117_Supplemental_Figures.pdf [file supp_gr.233098.117_Supplemental_Figures.pdf]

# SUPPLEMENTAL FIGURES FOR

## “Damage responsive elements in *Drosophila* regeneration”

Elena Vizcaya-Molina, Cecilia C. Klein, Florenci Serras, Rakesh Mishra, Roderic Guigó and  
Montserrat Corominas

### TABLE OF CONTENTS

- Supplemental Fig. S1 - RNA-seq analysis workflow
- Supplemental Fig. S2 - ATAC-seq analysis workflow
- Supplemental Fig. S3 - Statistics and replicate analysis of RNA-seq
- Supplemental Fig. S4 - Statistics and replicate analysis of ATAC-seq
- Supplemental Fig. S5 - Expression profiles of upregulated transcription factors
- Supplemental Fig. S6 - Pathway enrichment in upregulated genes
- Supplemental Fig. S7 - Features of genomic clusters
- Supplemental Fig. S8 - Gene Ontology of differentially expressed genes
- Supplemental Fig. S9 - Statistics and replicate analysis of third instar larval ATAC-seq
- Supplemental Fig. S10 - Accessible chromatin landscape after cell death induction
- Supplemental Fig. S11 - Statistics and analysis of ChIP-seq
- Supplemental Fig. S12 - Chromatin features of DRREs
- Supplemental Fig. S13 - Validation of the activity of DRREs after damage
- Supplemental Fig. S14 - Tissue usage of DRREs
- Supplemental Fig. S15 - Reusage and conservation of DRREs
- Supplemental Fig. S16 - Conservation of DRREs
- Supplemental Fig. S17 - Homology of genes implicated in fly regeneration
- Supplemental Figures References

# Supplemental Figure S1

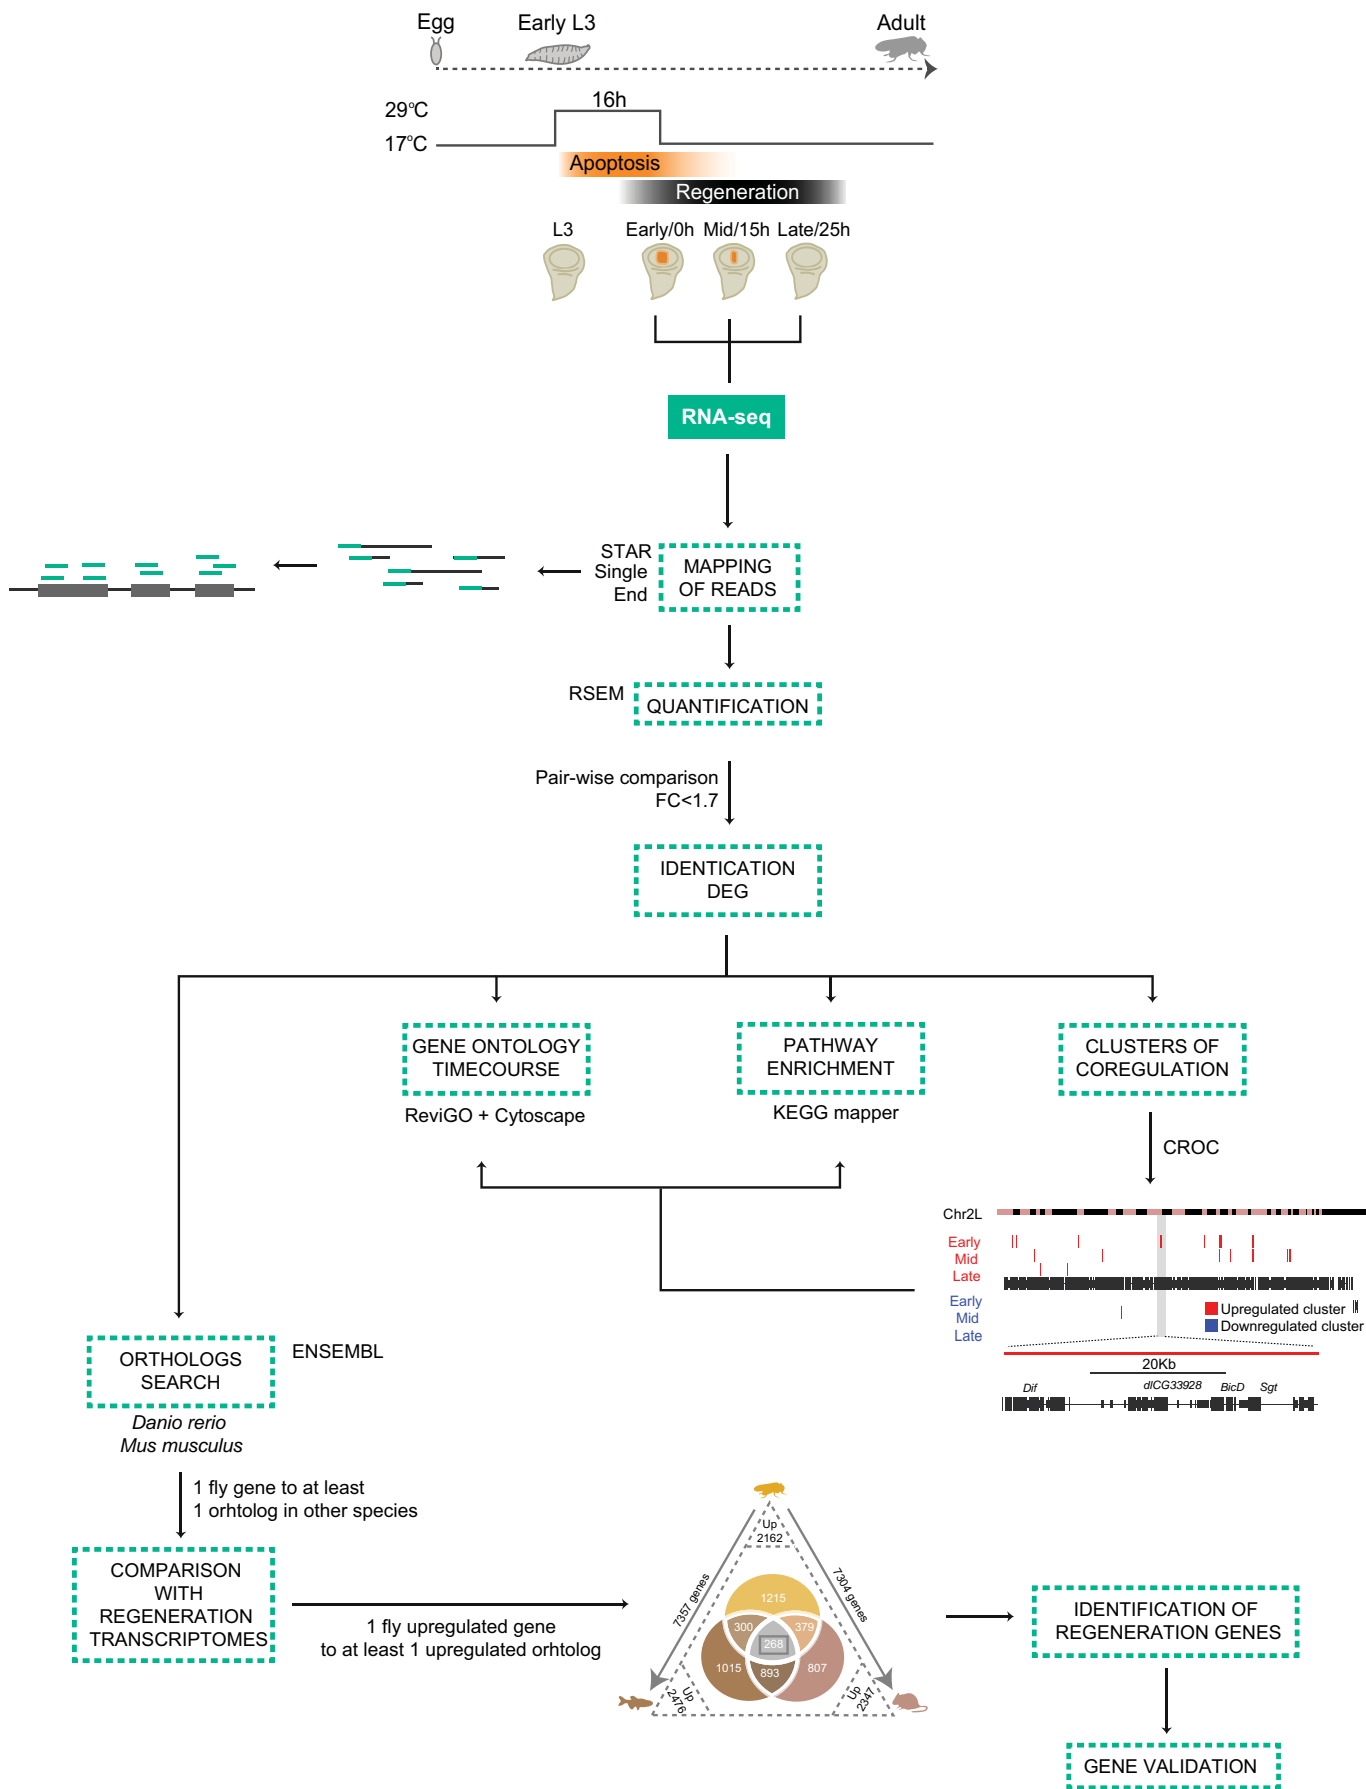

RNA-seq analysis workflow. Workflow of the logic and the analysis carried out.

# Supplemental Figure S2

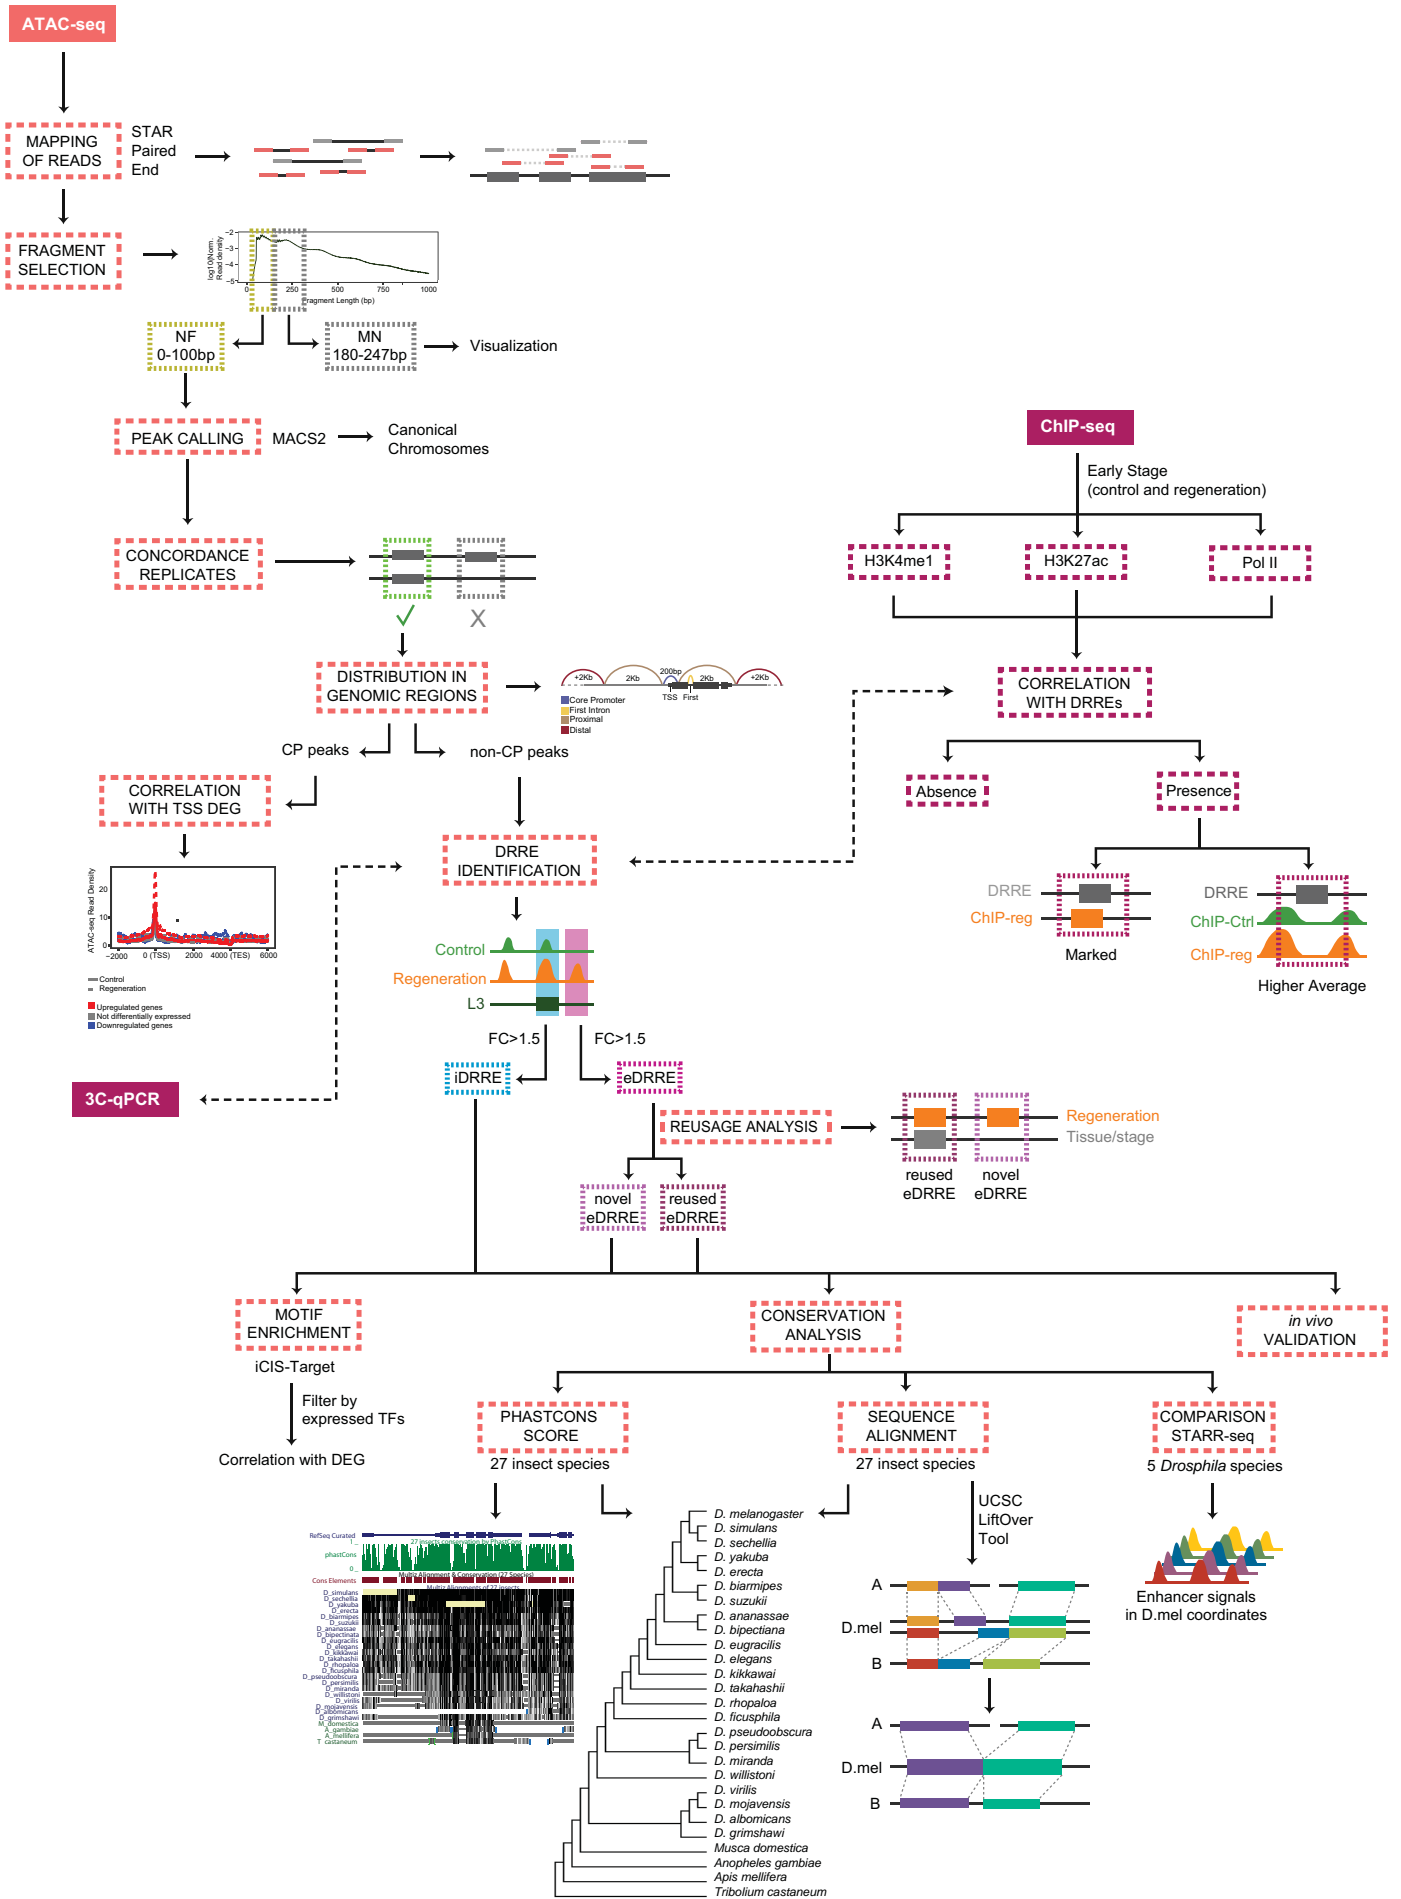

ATAC-seq analysis workflow. Workflow of the logic and the analysis carried out.

## Supplemental Figure S3

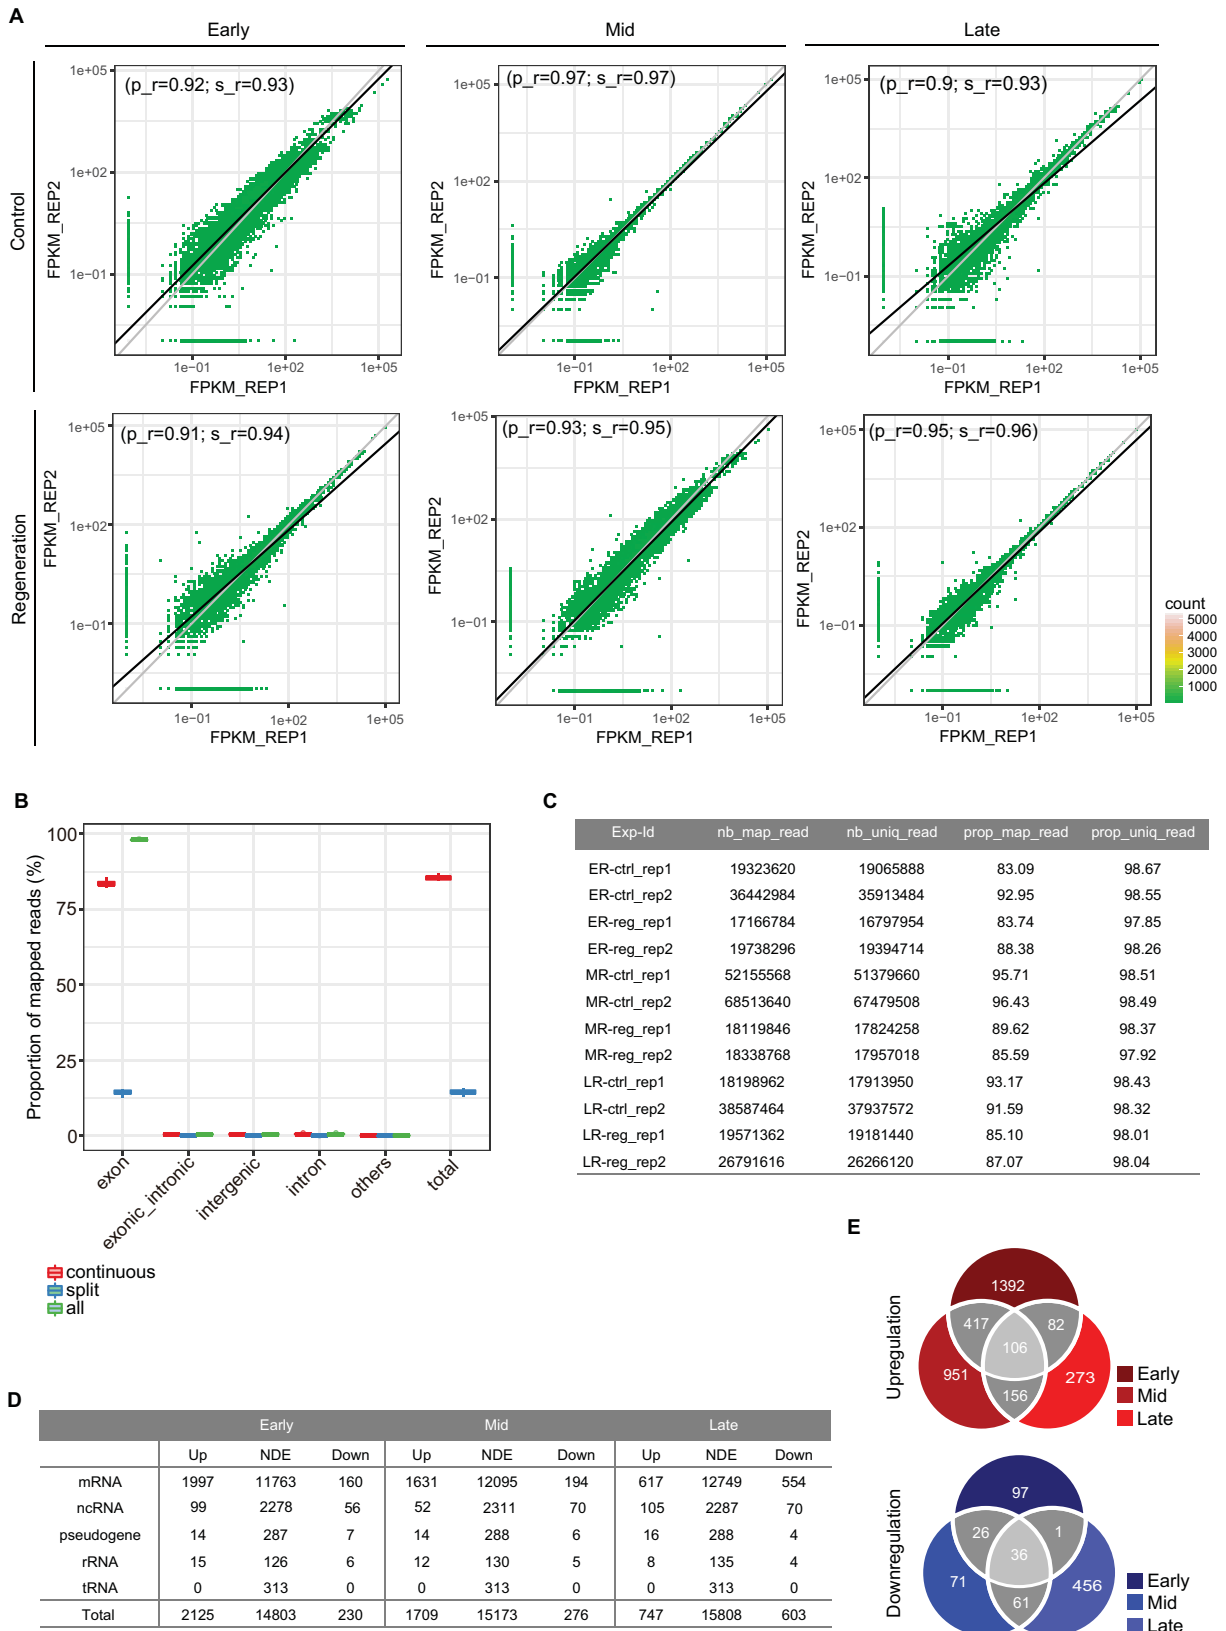

**Statistics and replicate analysis of RNA-seq.** RNA-seq was performed from two independent biological replicates from each time point and condition. (A) Scatter plots showing high correlation of gene expression levels between replicates (Pearson and Spearman correlation coefficients higher than 0.9, denoted by  $p_r$  and  $s_r$ , respectively). (B) Mapped genomic reads were classified as: exonic if reads map entirely within exons, exonic-intronic if reads map both in exons and introns, intergenic if reads map outside genes and intronic if reads map entirely within a gene but not within annotated exons. Split reads were reads mapping to splice junctions. (C) RNA-seq mapping statistics. Number and proportion of mapped reads and unique mapped reads are shown. Most reads (98%) map to the exons. (D) Number of differentially expressed genes at all time points. Gene types are specified. (E) Venn diagram showing the intersection of DE genes in the three time points.

## Supplemental Figure S4

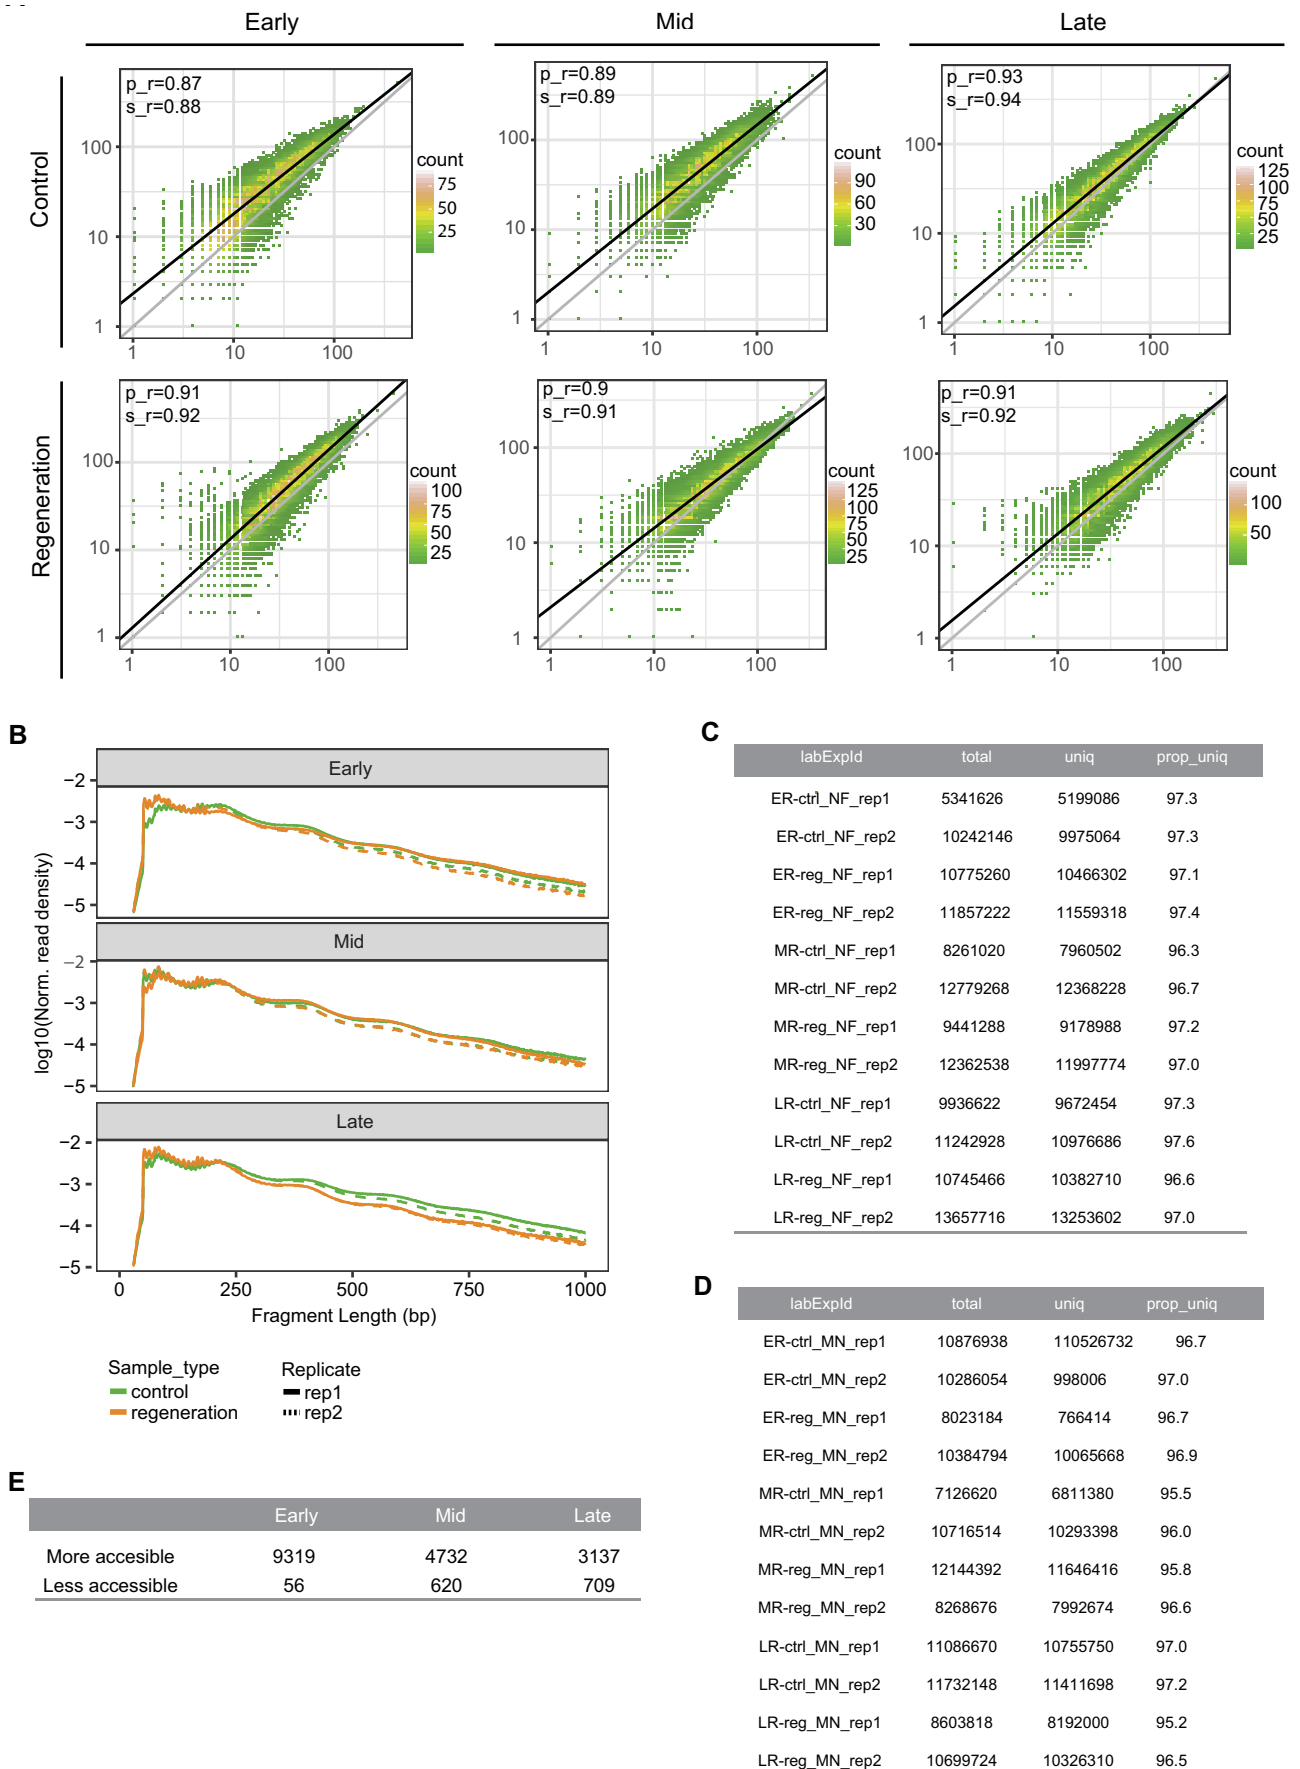

**Statistics and replicate analysis of ATAC-seq.** ATAC-seq was performed from two independent biological replicates from each time point and condition. (A) Scatter plots showing high correlation of peak heights between replicates (Pearson and Spearman correlation coefficients higher than 0.85, denoted by  $p_r$  and  $s_r$ , respectively). (B) Line plot showing read density per fragment length. Fragments belonging to nucleosome-free region (NF) fall in 0 to 100bp, meanwhile mononucleosome fraction (MN) fall in 180 to 247bp. (C) NF mapping statistics. (D) MN mapping statistics. (E) Number of differentially accessible regions at all time points.

## Supplemental Figure S5

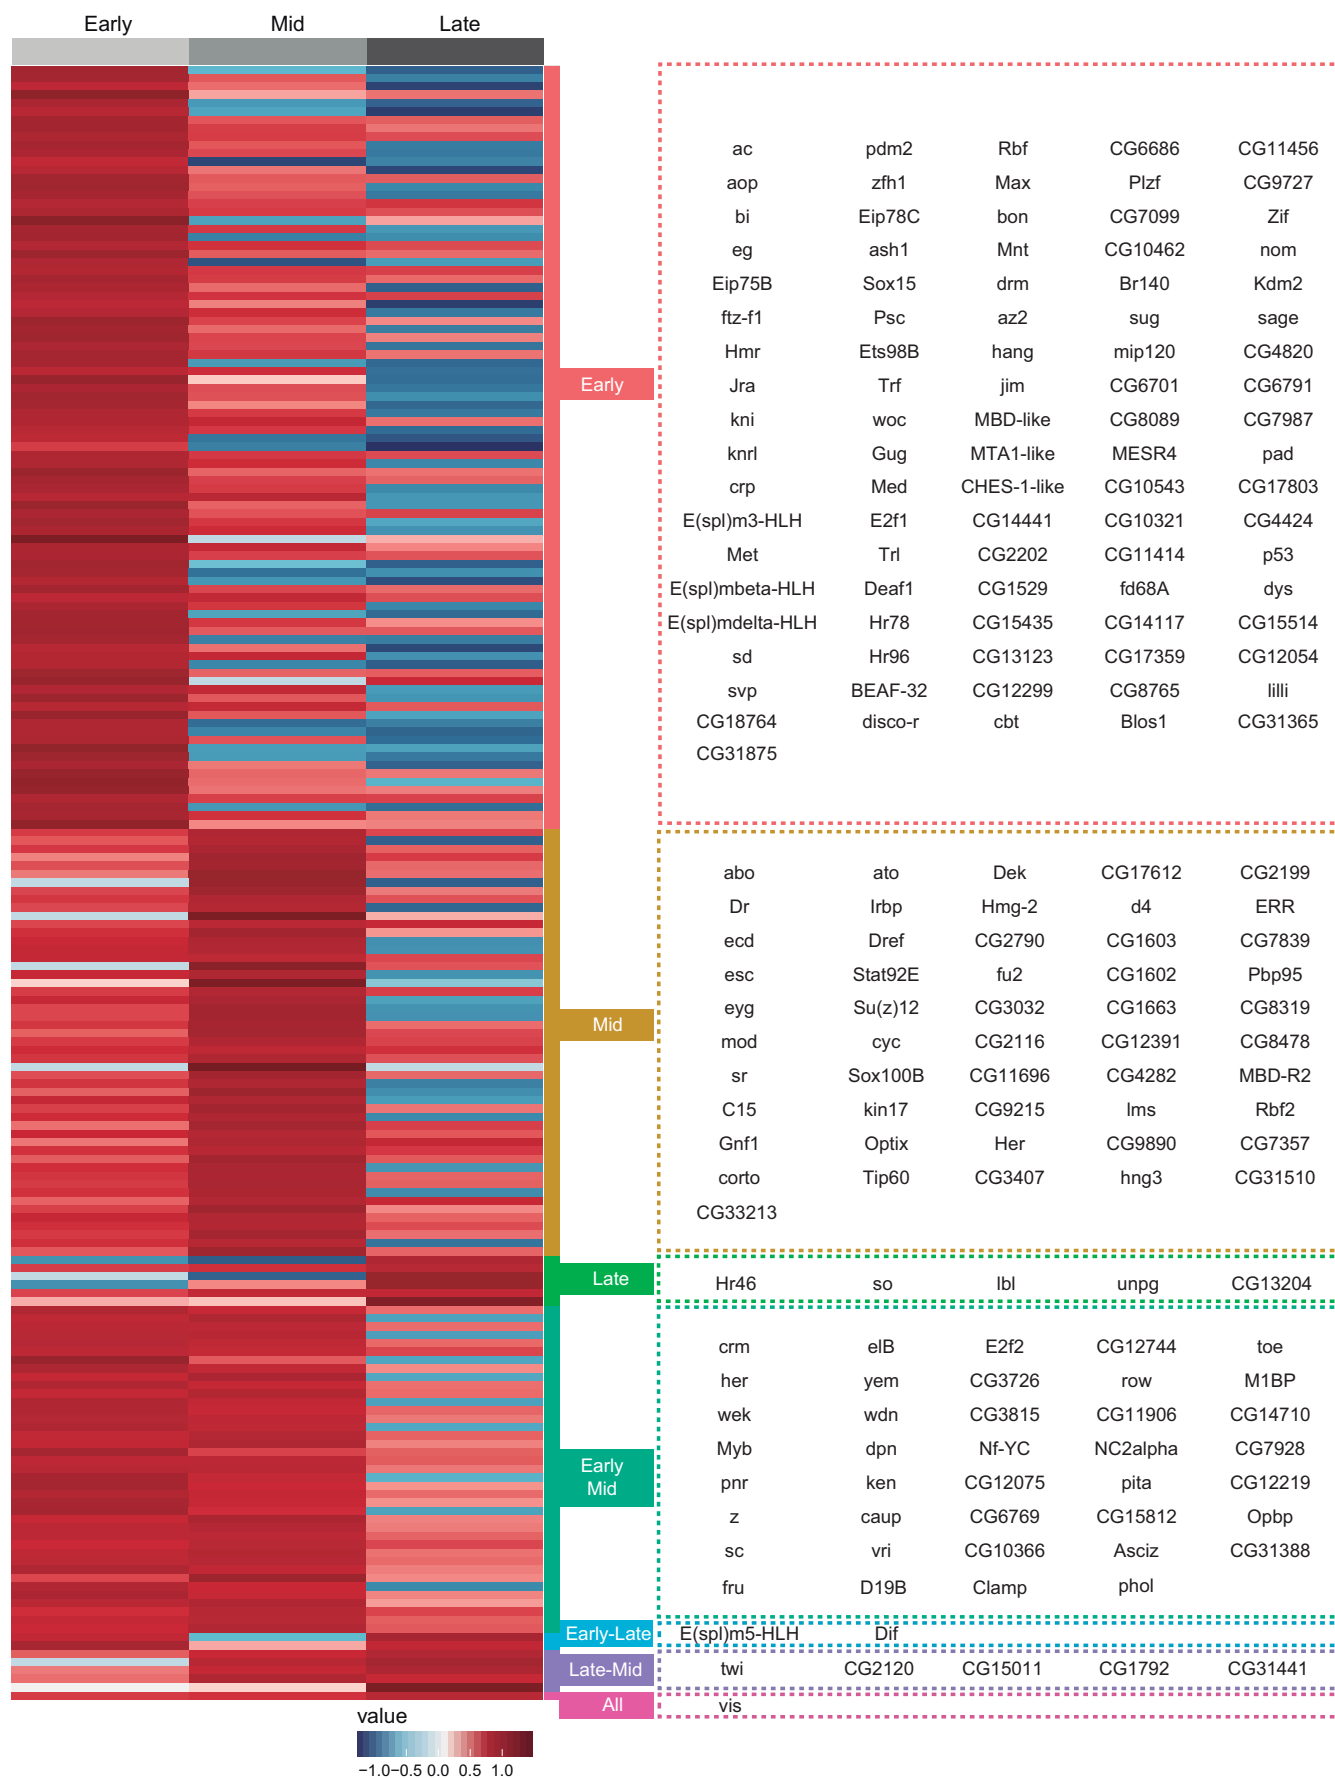

**Expression profiles of upregulated transcription factors.** Heatmap showing the expression fold change of genes encoding transcription factors upregulated in at least one time point throughout the recovery process. Gene names are shown.

## Supplemental Figure S6

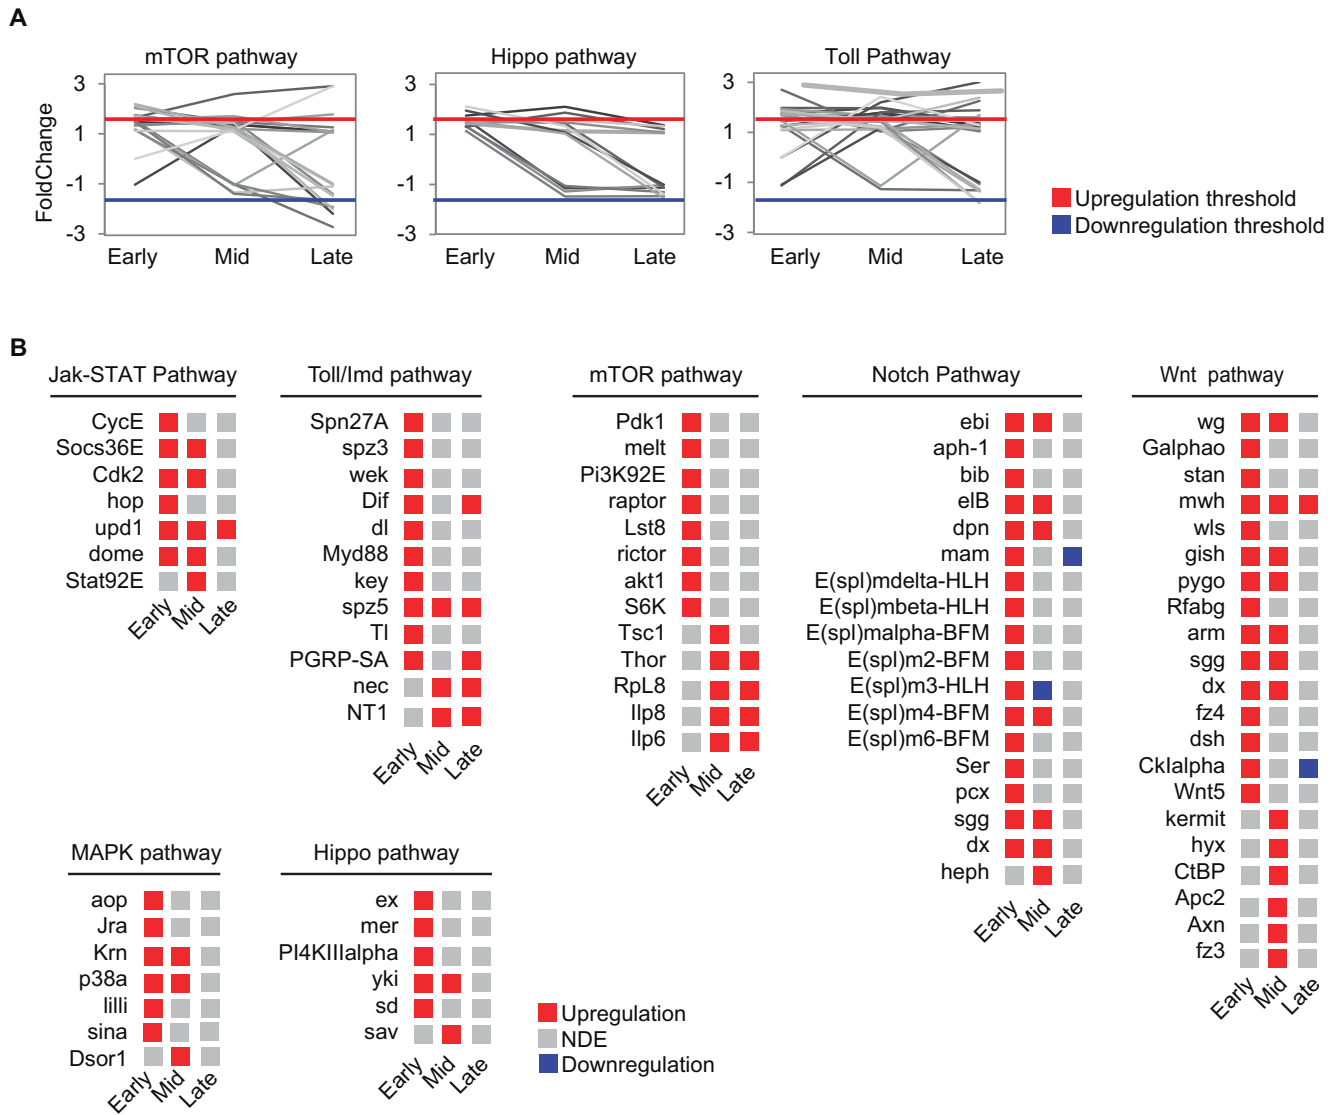

**Pathway enrichment in upregulated genes.** (A) Line plots showing expression changes over time of genes that belong to signaling pathways significantly enriched in regeneration. Expression is shown as fold change between control and regeneration at each time point. Each gene is plotted as a single line. (B) Expression profile of the upregulated members of the enriched pathways at different time points.

# Supplemental Figure S7

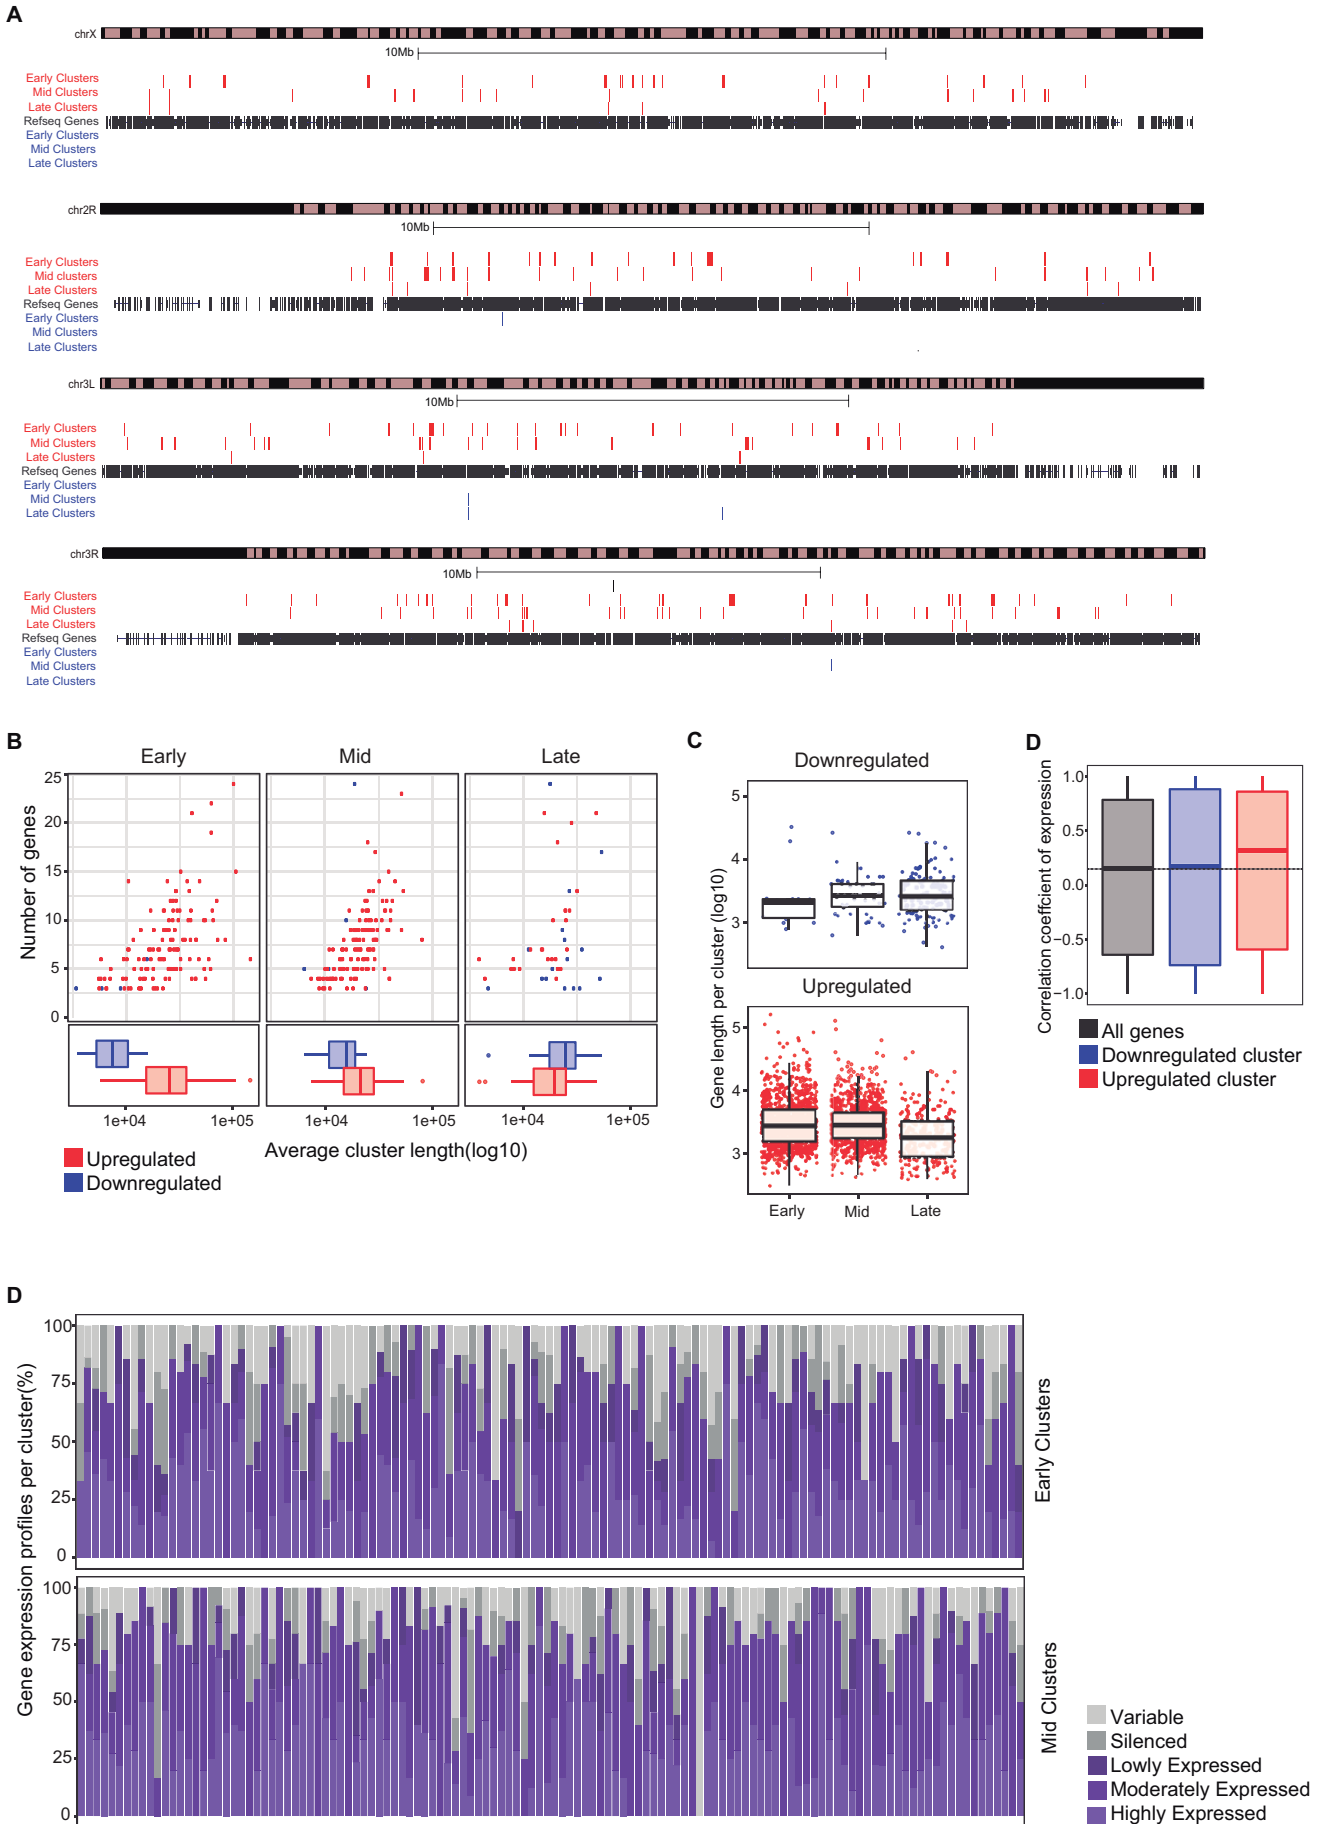

**Features of genomic clusters.** (A) Genomic map of clusters of differentially expressed genes on all chromosomes except 2L. Each red or blue box represents one single cluster. The size of each box denotes the length of each cluster. (B) Scatter plot showing the number of protein coding genes and the length of the cluster. Each dot represents a cluster (top). Box plot showing the average cluster length (bottom). (C) Box plot showing the average gene length per cluster. Each dot represents a cluster (Top). (D) Box plot showing the average Pearson correlation coefficient of gene expression through time. (D) Bar plot showing in percentage the average gene expression profile through time per cluster. Each bar represents one individual cluster.



## Supplemental Figure S8

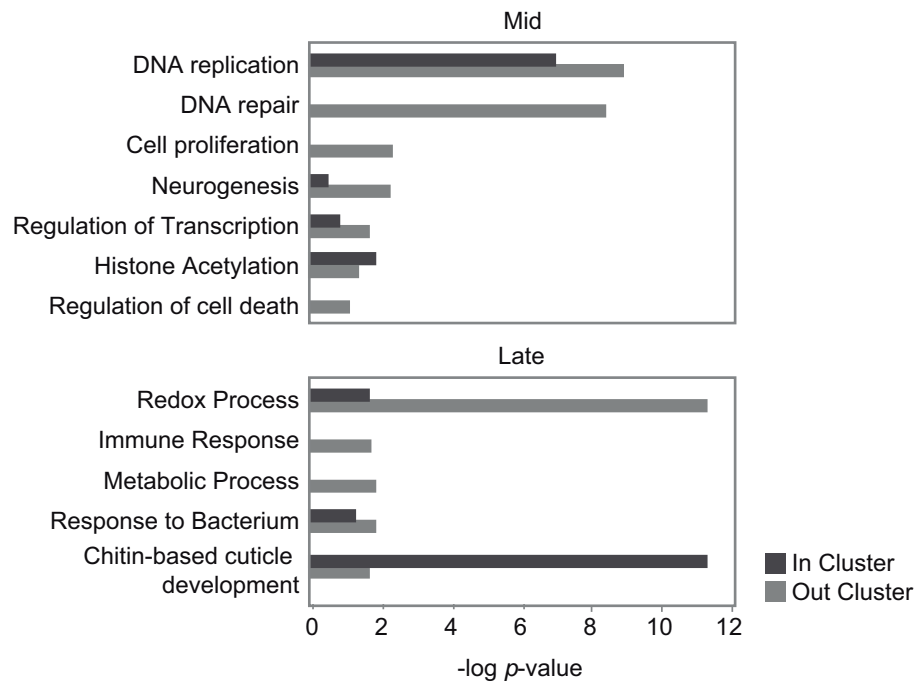

**Gene Ontology of differentially expressed genes.** GO term enrichment for the set of upregulated genes located inside or outside the clusters at mid and late time points. All the categories plotted are significant in at least one group of genes (the absence of a bar denotes no enrichment in that group).

## Supplemental Figure S9

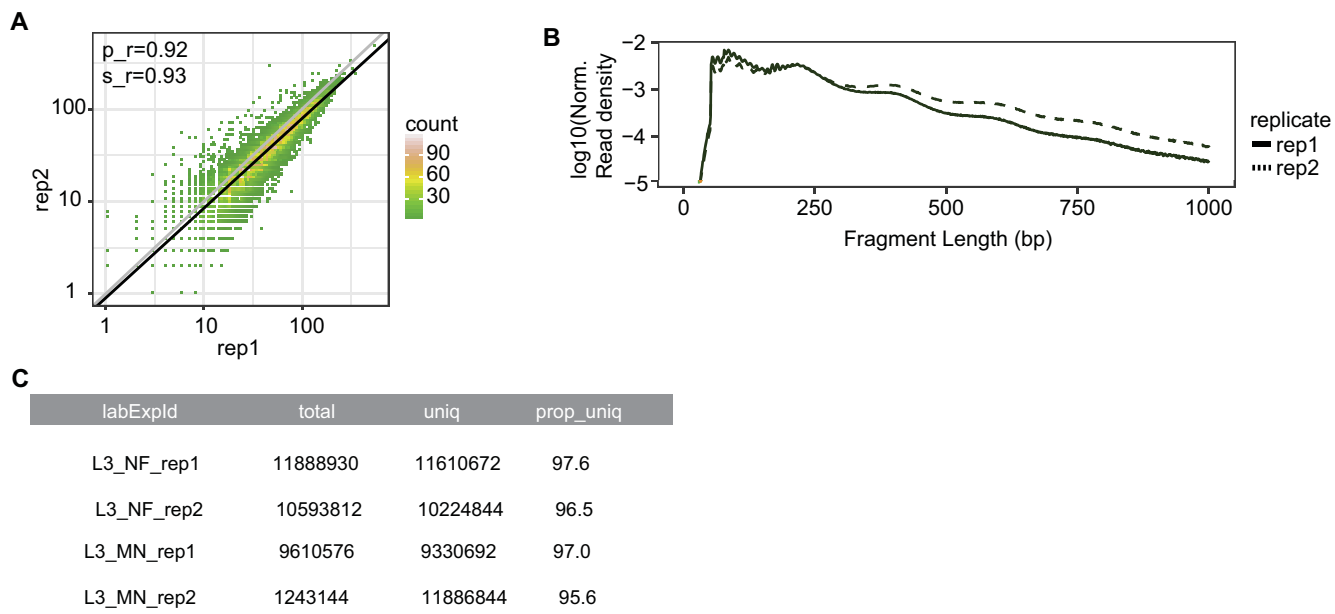

**Statistics and replicate analysis of third instar larval ATAC-seq.** (A) Scatter plot showing high correlation of peak height between replicates in L3 ATAC-seq (Pearson and Spearman correlation coefficients higher than 0.9, denoted by  $p_r$  and  $s_r$ , respectively). (B) Line plot showing read density per fragment length. Fragments belonging to NF will fall in 0 to 100bp meanwhile MN fraction will fall in 180 to 247bp. (C) NF and MN mapping statistics for L3.

## Supplemental Figure S10

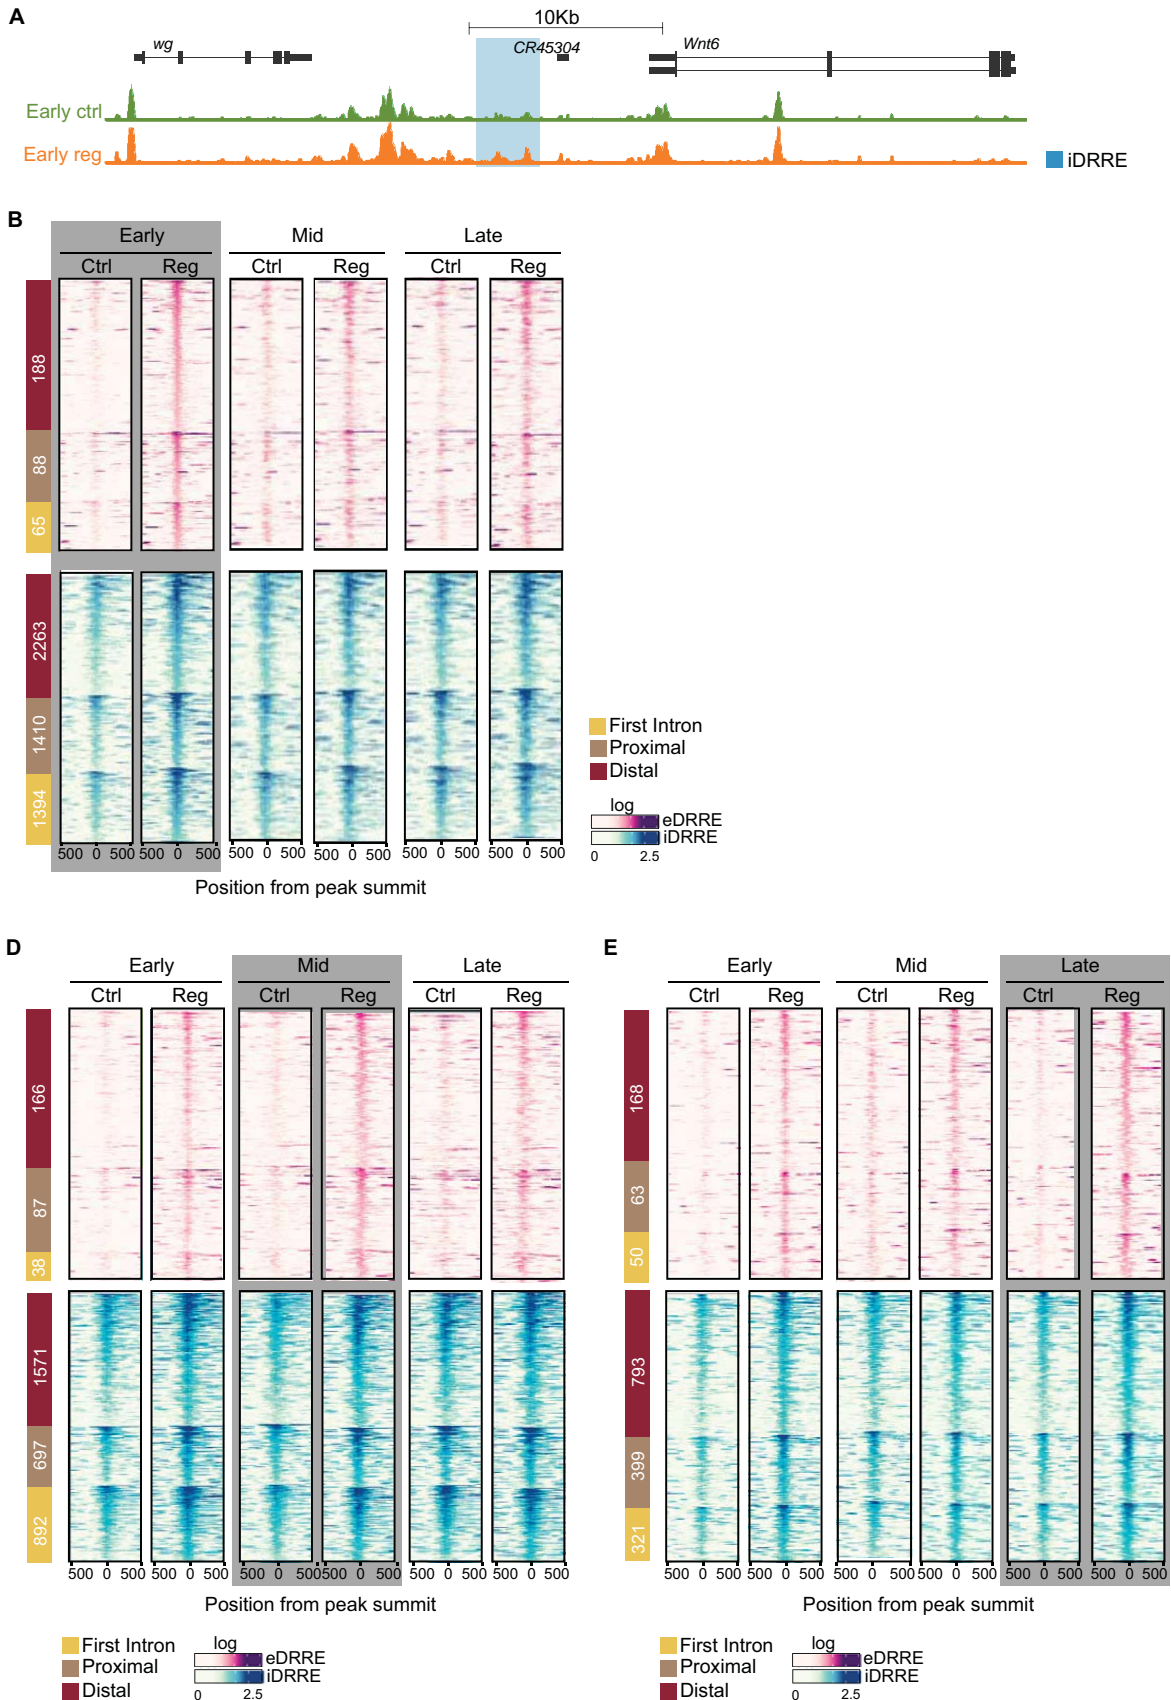

**Accessible chromatin landscape after cell death induction.** (A) Genome browser screenshot highlighting the BRV18-B region of the damage-activated WNT enhancer (Harris et al. 2016). This enhancer is now classified as a iDRRE. (B) Heatmaps showing NF regions around  $\pm 500$ bp of the peak summit of early DRREs displayed across time. (C) Heatmaps showing NF regions around  $\pm 500$ bp of the peak summit of mid DRREs displayed across time. (D) Heatmaps showing NF regions around  $\pm 500$ bp of the peak summit of late DRREs displayed across time. Sites are ordered by genomic distribution (shown in the left) and by peak height based on the ATAC-seq regeneration sample highlighted in gray.

## Supplemental Figure S11

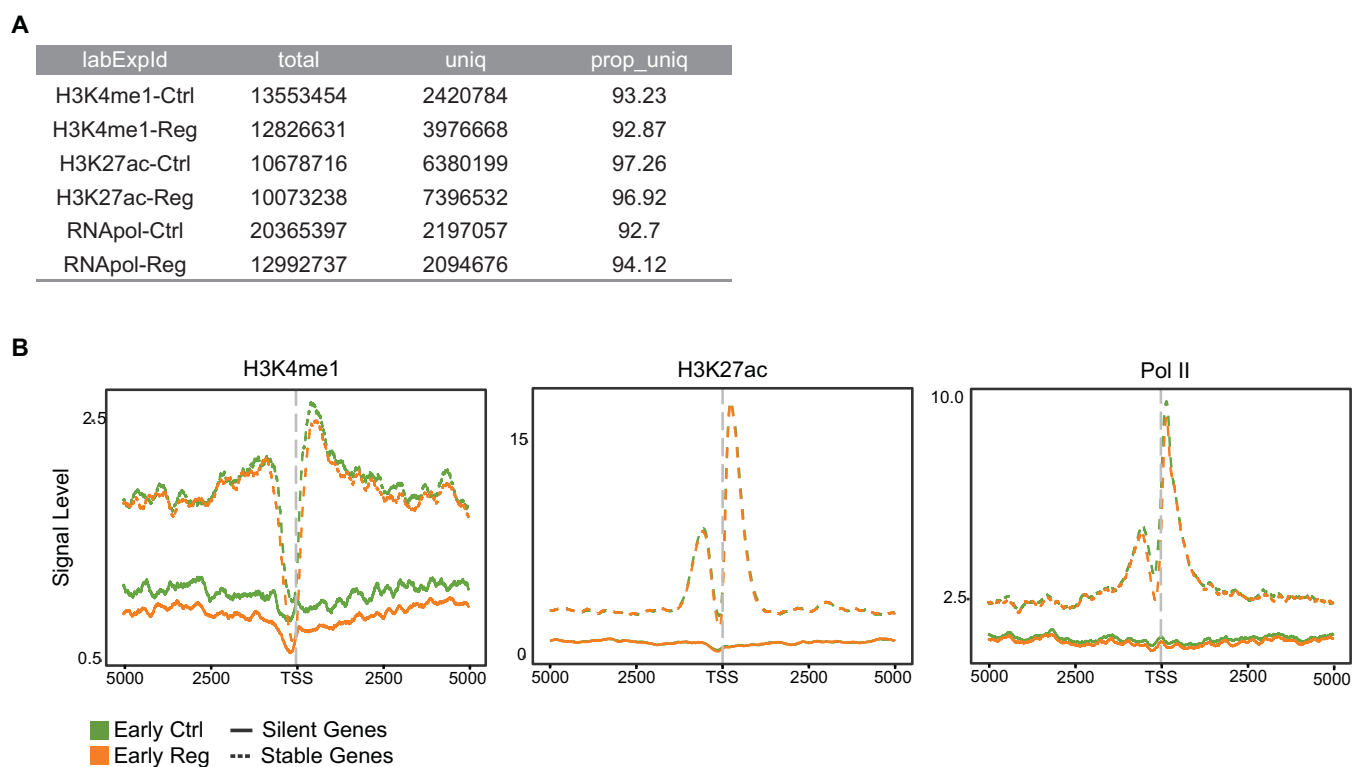

**Statistics and analysis of ChIP-seq.** (A) ChIP-seq mapping statistics for early control and regeneration. (B) Quality check for ChIP-seq based on the signal level at the TSS of modEncode stable and silent genes. Silent genes should have flat signal whereas stable genes should have clear signal (see Materials and Methods). Average profile of H3K4me1, H3K27ac and Pol II around  $\pm 5000$  bp of the TSS of L3 wing disc modENCODE silent and active genes.

## Supplemental Figure S12

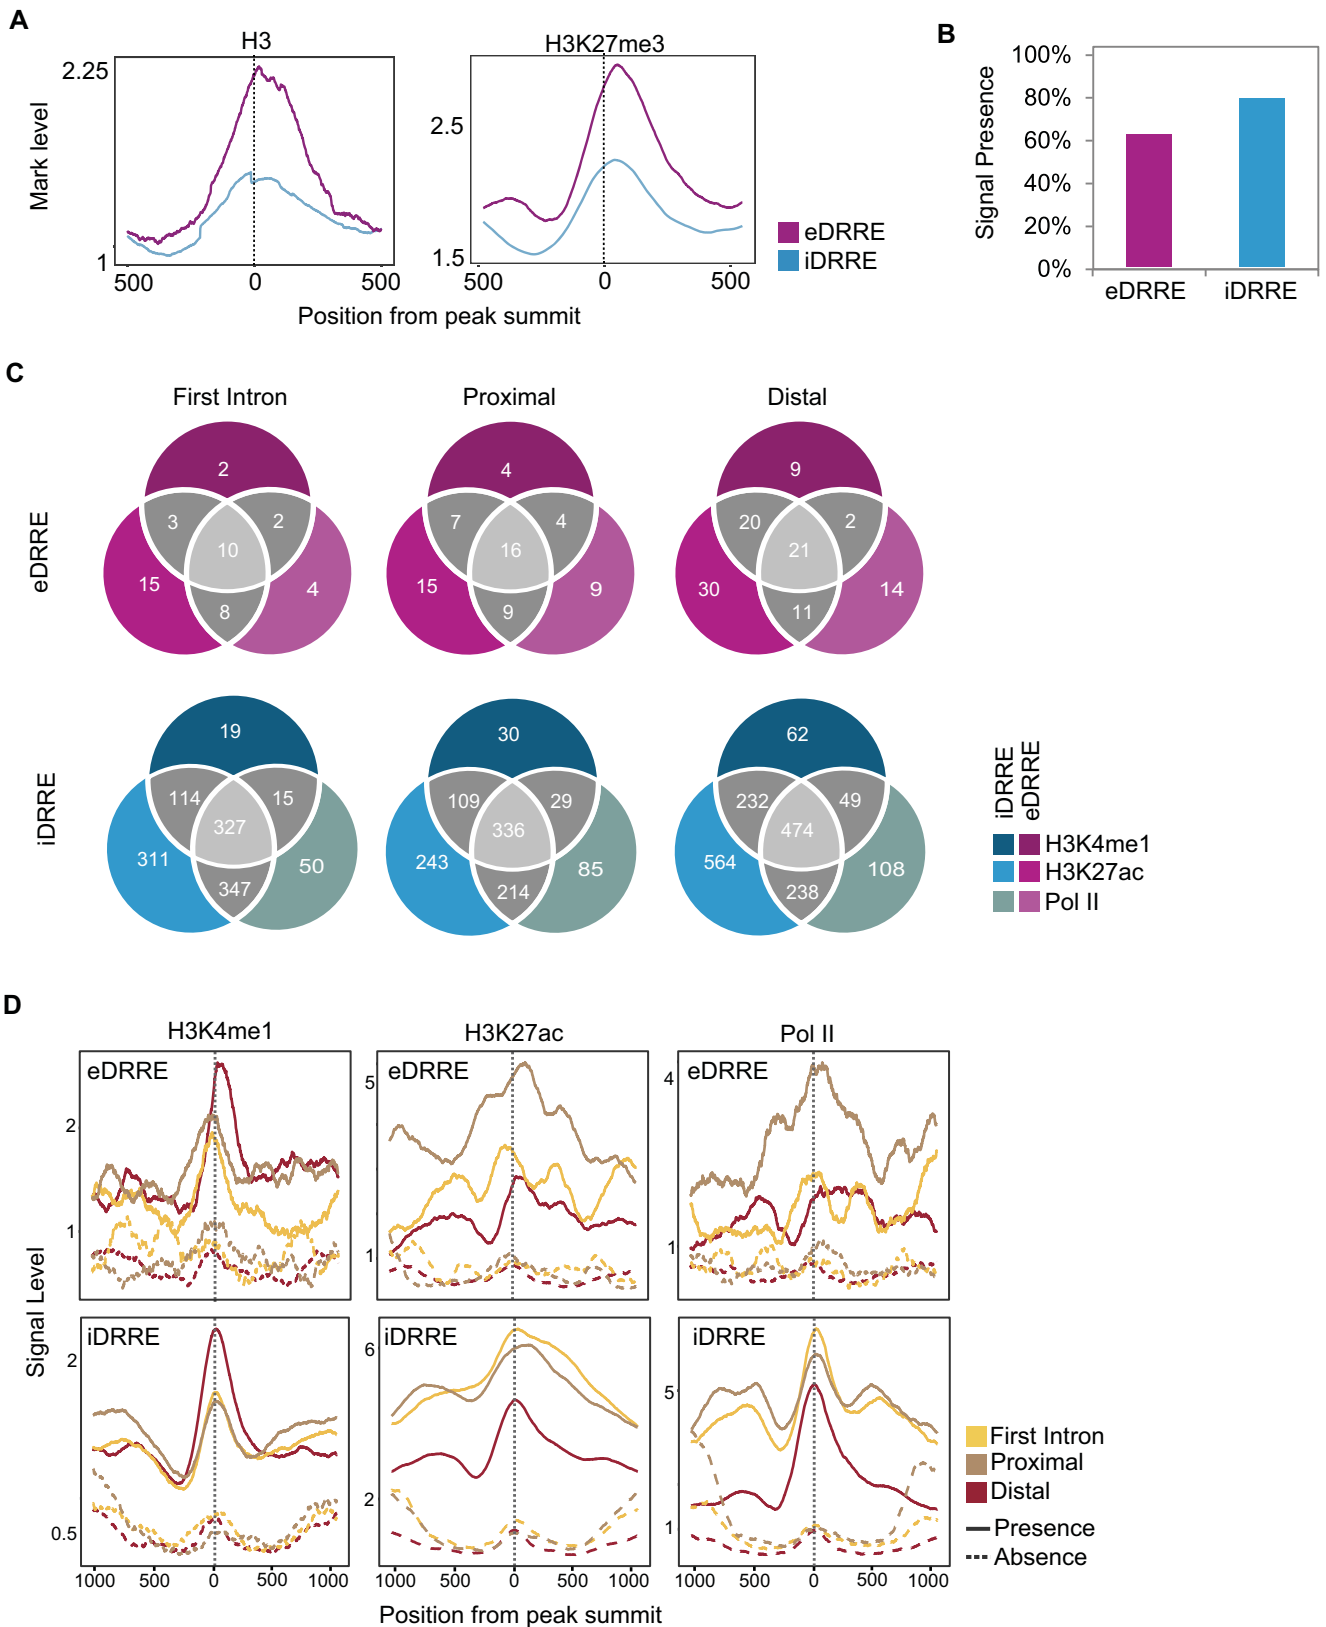

**Chromatin features of DRREs.** (A) Average profile of H3 and H3K27me3 around  $\pm 500$ bp of the peak summit of DRREs at L3 wing discs. (B) Bar plot showing the percentage of presence or absence of at least one ChIP-seq signal at DRREs. (C) Venn diagrams showing the intersection of ChIP signal in DRREs per genomic distribution. (D) Average profile of ChIP-seq signal around  $\pm 1000$ bp of the peak summit of DRREs in regeneration. A solid line denotes DRREs with presence of at least one ChIP-seq signal and a dashed line denotes absence of any ChIP-seq signal.

## Supplemental Figure S13

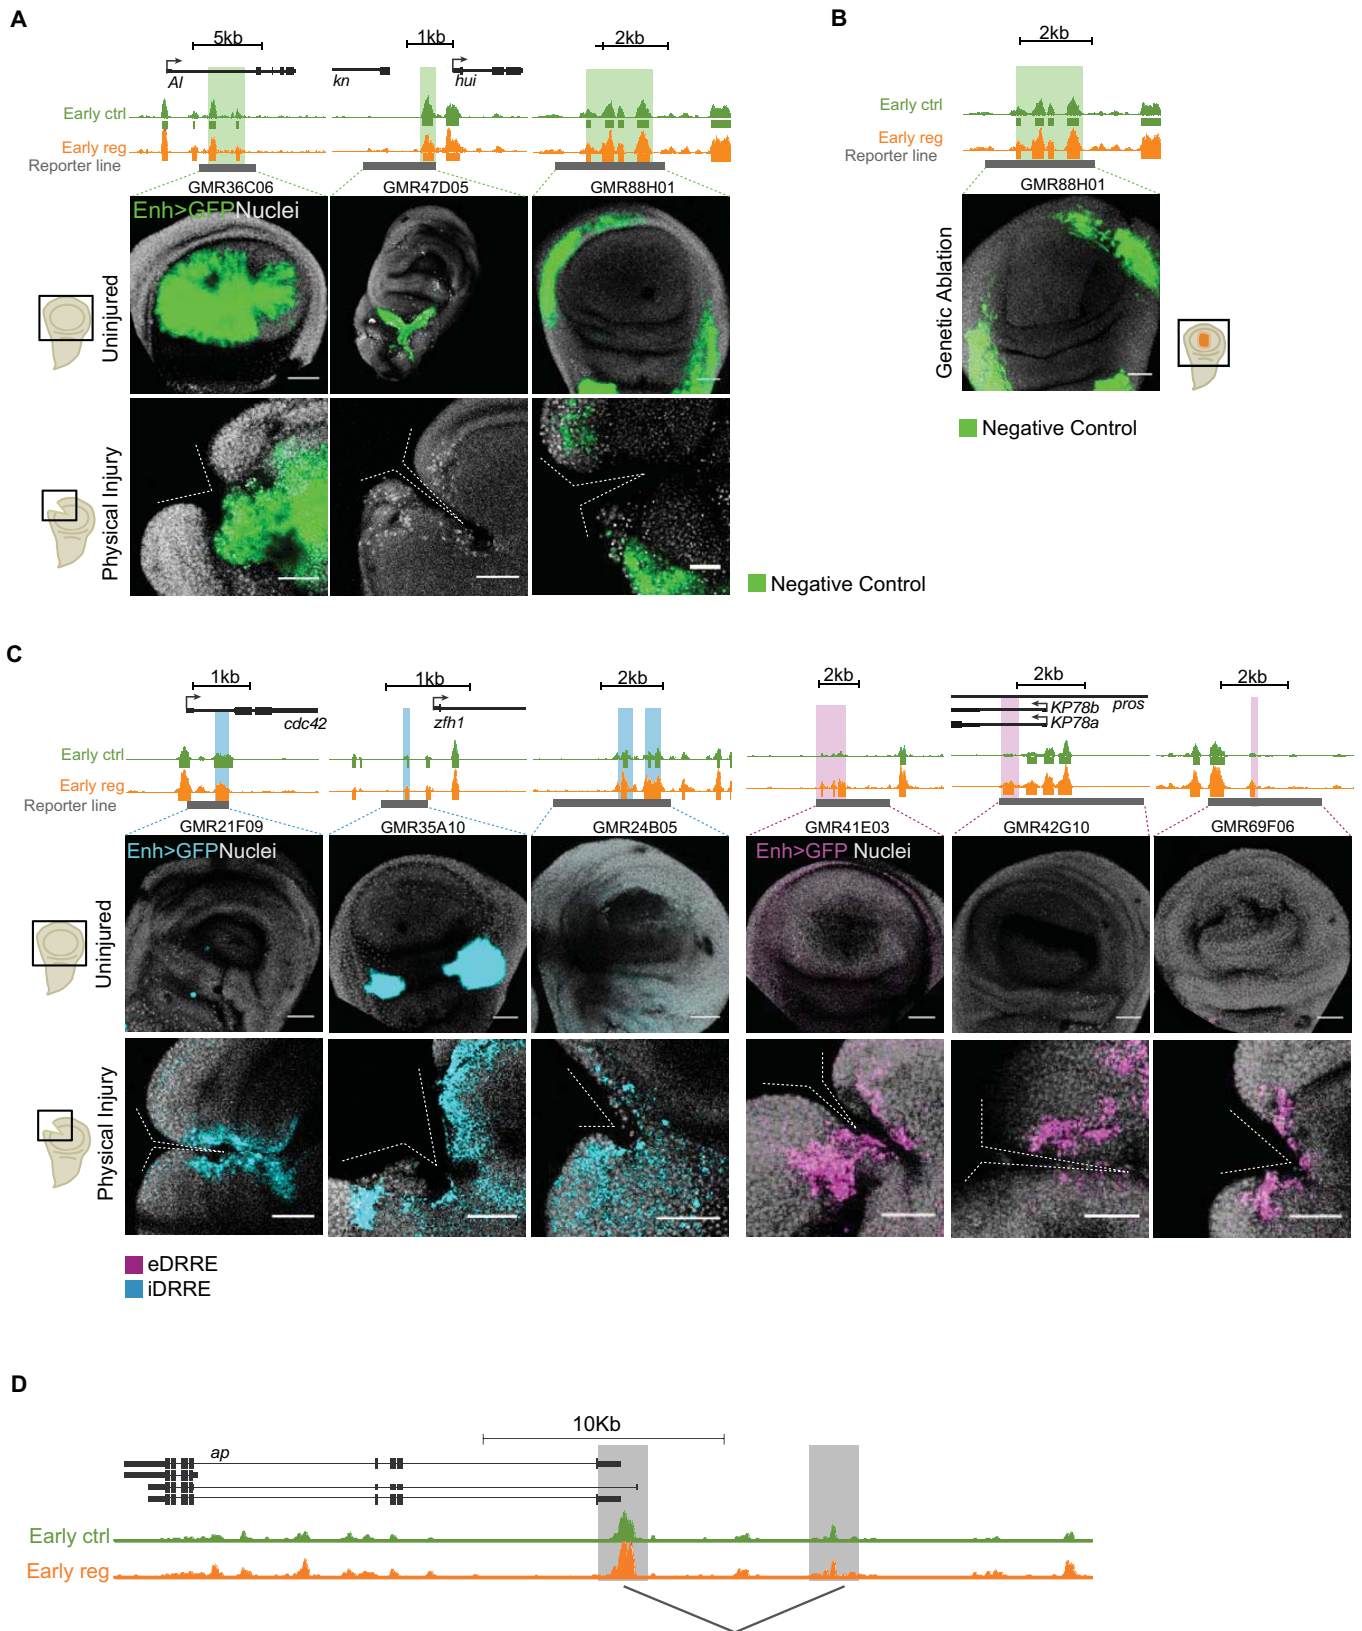

**Validation of the activity of DRREs after damage.** (A, B) Reporter lines containing regions not showing differential accessibility after damage and used as negative controls. (C) Validation of DRREs after physical damage using reporter lines. Genome Browser screenshot showing the ATAC-seq profile (control and regeneration) at the early regeneration of validated enhancers (highlighted in green if negative control; blue if iDRRE; purple if eDRRE), and the region covered by the reporter line in gray (top). Confocal images of wing discs showing enhancer activity as GFP intensity (bottom). The injury domain is shown in a schematic drawing in the right. (D) Genome Browser screenshot depicting the interaction of a known enhancer on the *Apterous* (*ap*) gene (Bieli et al. 2015) used as a control on 3C experiments.

## Supplemental Figure S14

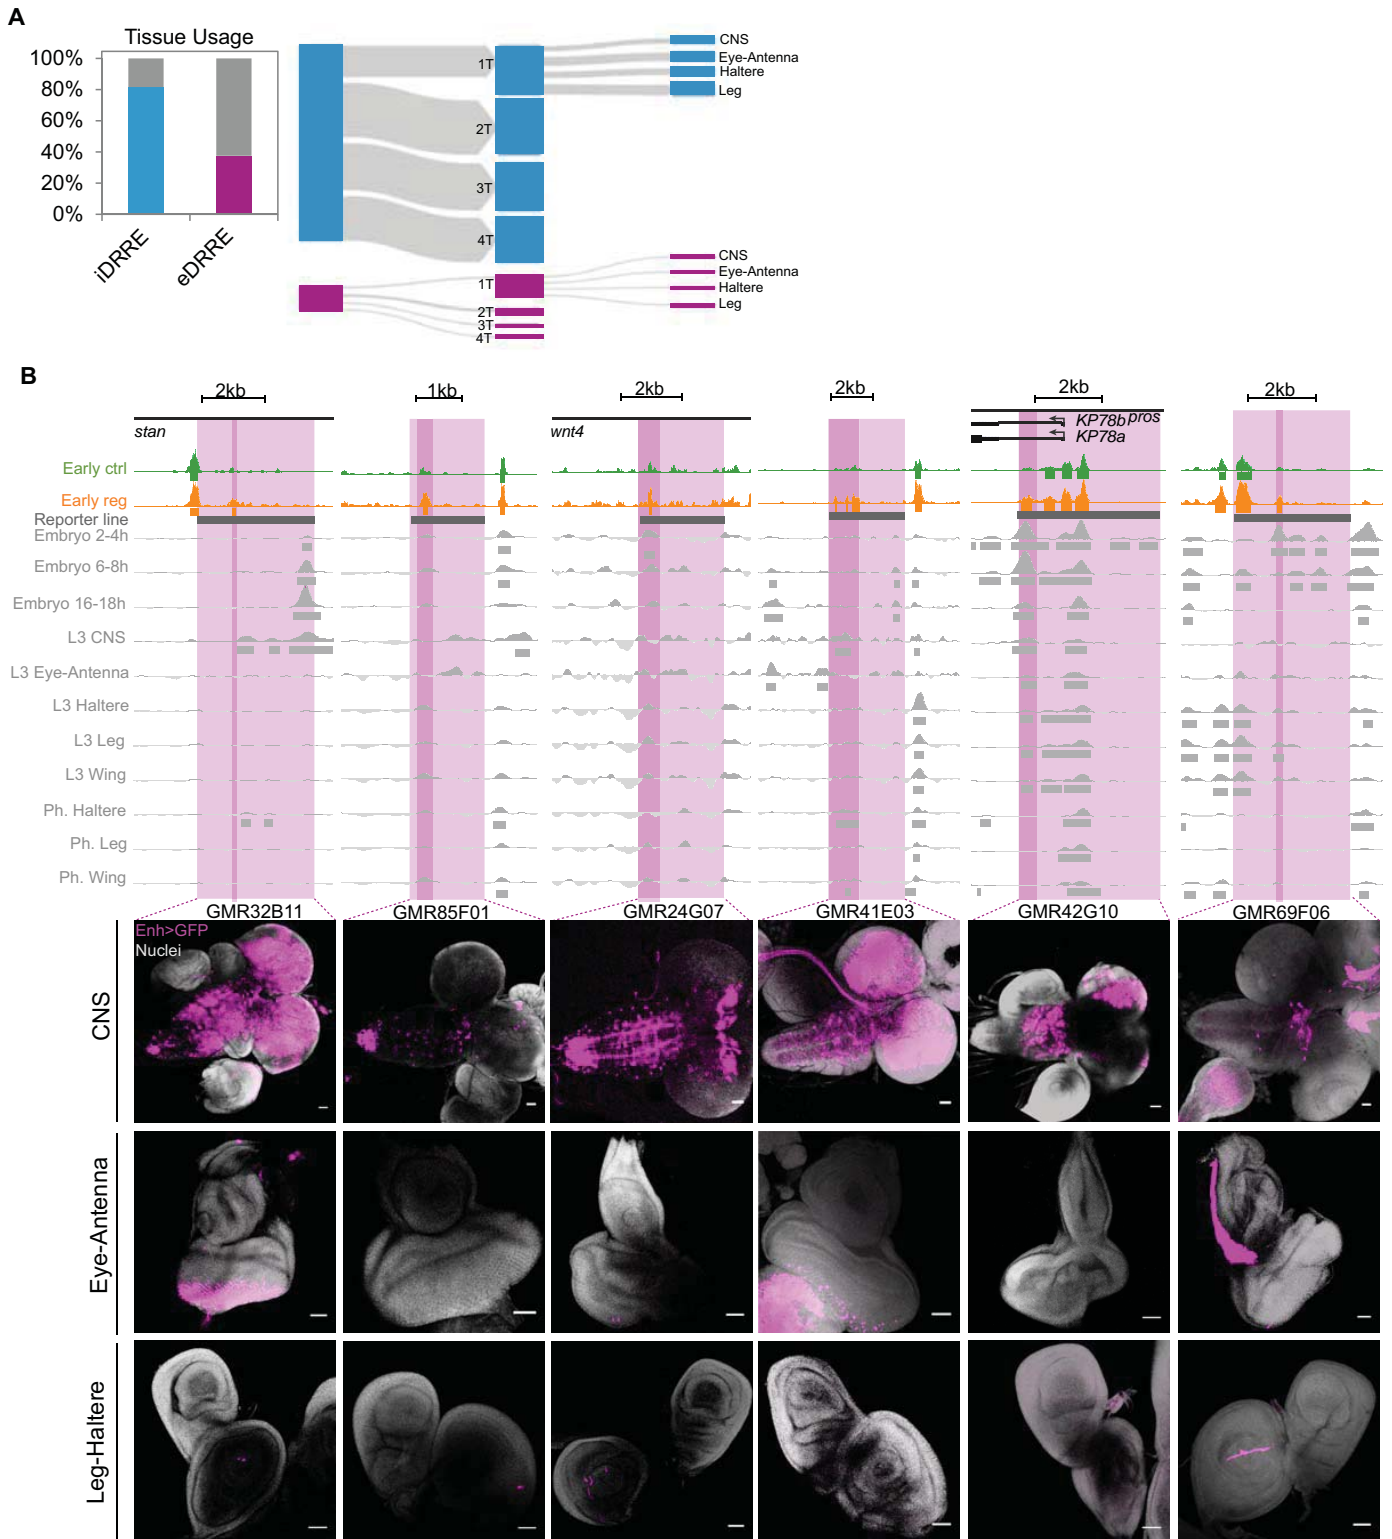

**Tissue usage of DRREs.** (A) Flux plot of enhancers activated after damage showing their usage in other tissues at L3 stage. DRRE peaks are classified in base of their presence in tissues (Central Nervous system – CNS, eye-antenna disc, haltere disc and leg disc) and in the amount of occasions each enhancer is employed (up to 4 tissues - T). (B) Tissue usage of reporter lines. Genome Browser screenshot showing the ATAC-seq profile (control and regeneration) at early regeneration of validated eDRREs (highlighted in dark purple), the FAIRE profiles (in gray) and the region covered by the reporter line (highlighted in light purple) (top). Confocal images of CNS, eye-antenna discs, leg discs and haltere discs at L3 stage showing enhancer activity as GFP intensity (bottom).

## Supplemental Figure S15

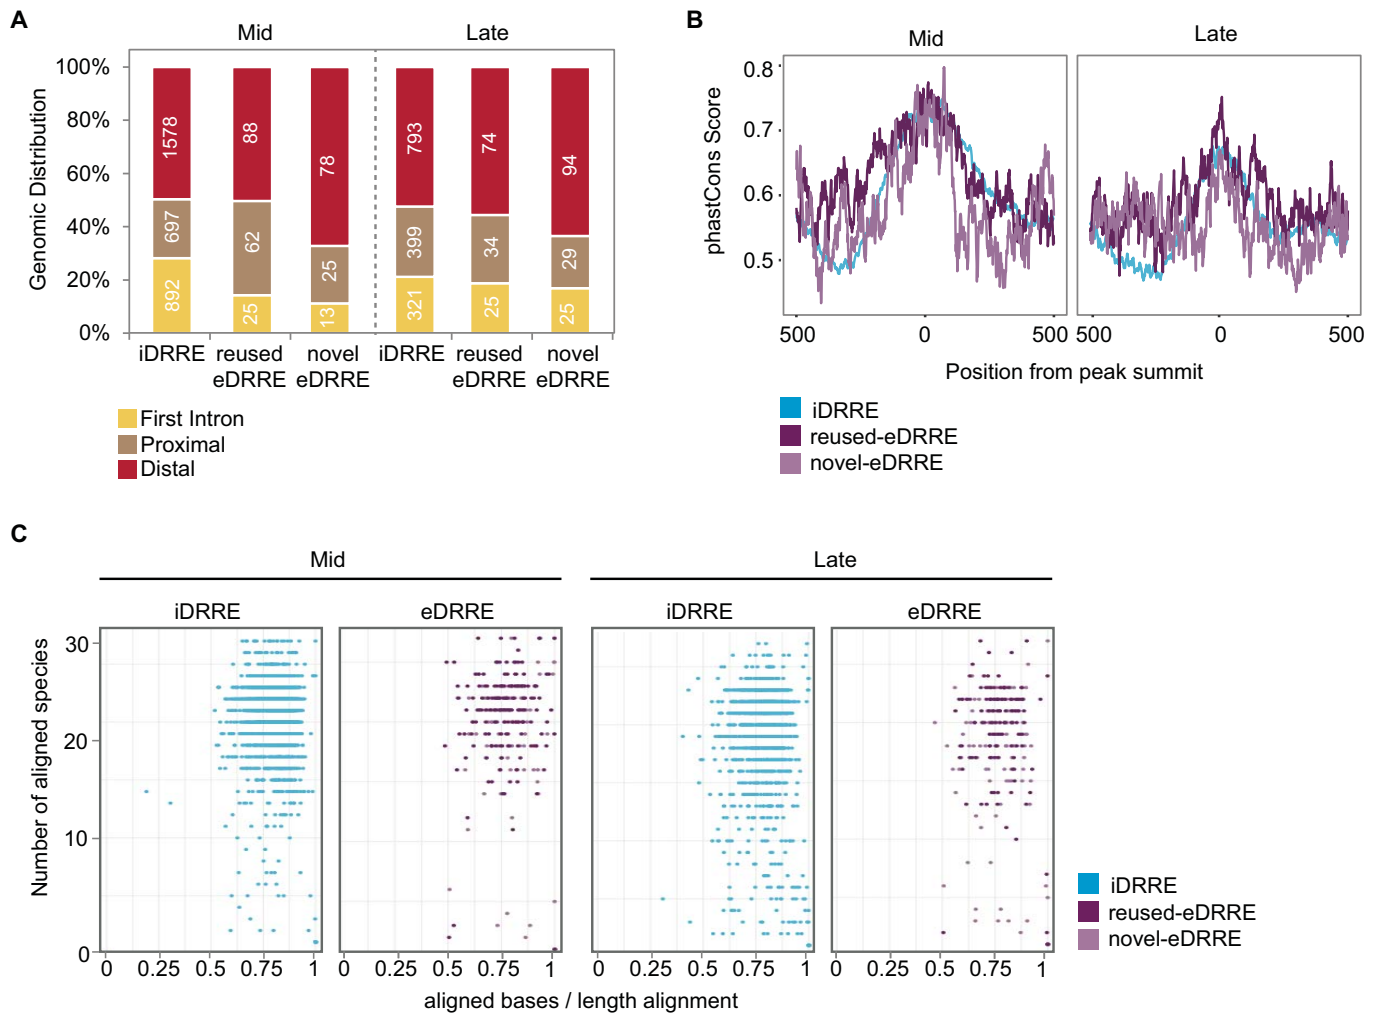

**Reuse and conservation of DRREs at mid and late time points.** (A) Genomic distribution of DRREs: first intron, proximal and distal. (B) Average distribution of PhastCons scores derived from 27 insect species in the DRRE sequences (defined as 500 bp upstream and downstream of the NF peak summit). (C) Conservation of DRREs across 27 insect species. Each dot corresponds to one independent enhancer. The Y-axis denotes the number of species that present the conserved enhancer. The X-axis represents the percentage of aligned bases per sequence length.



# Supplemental Figure S16

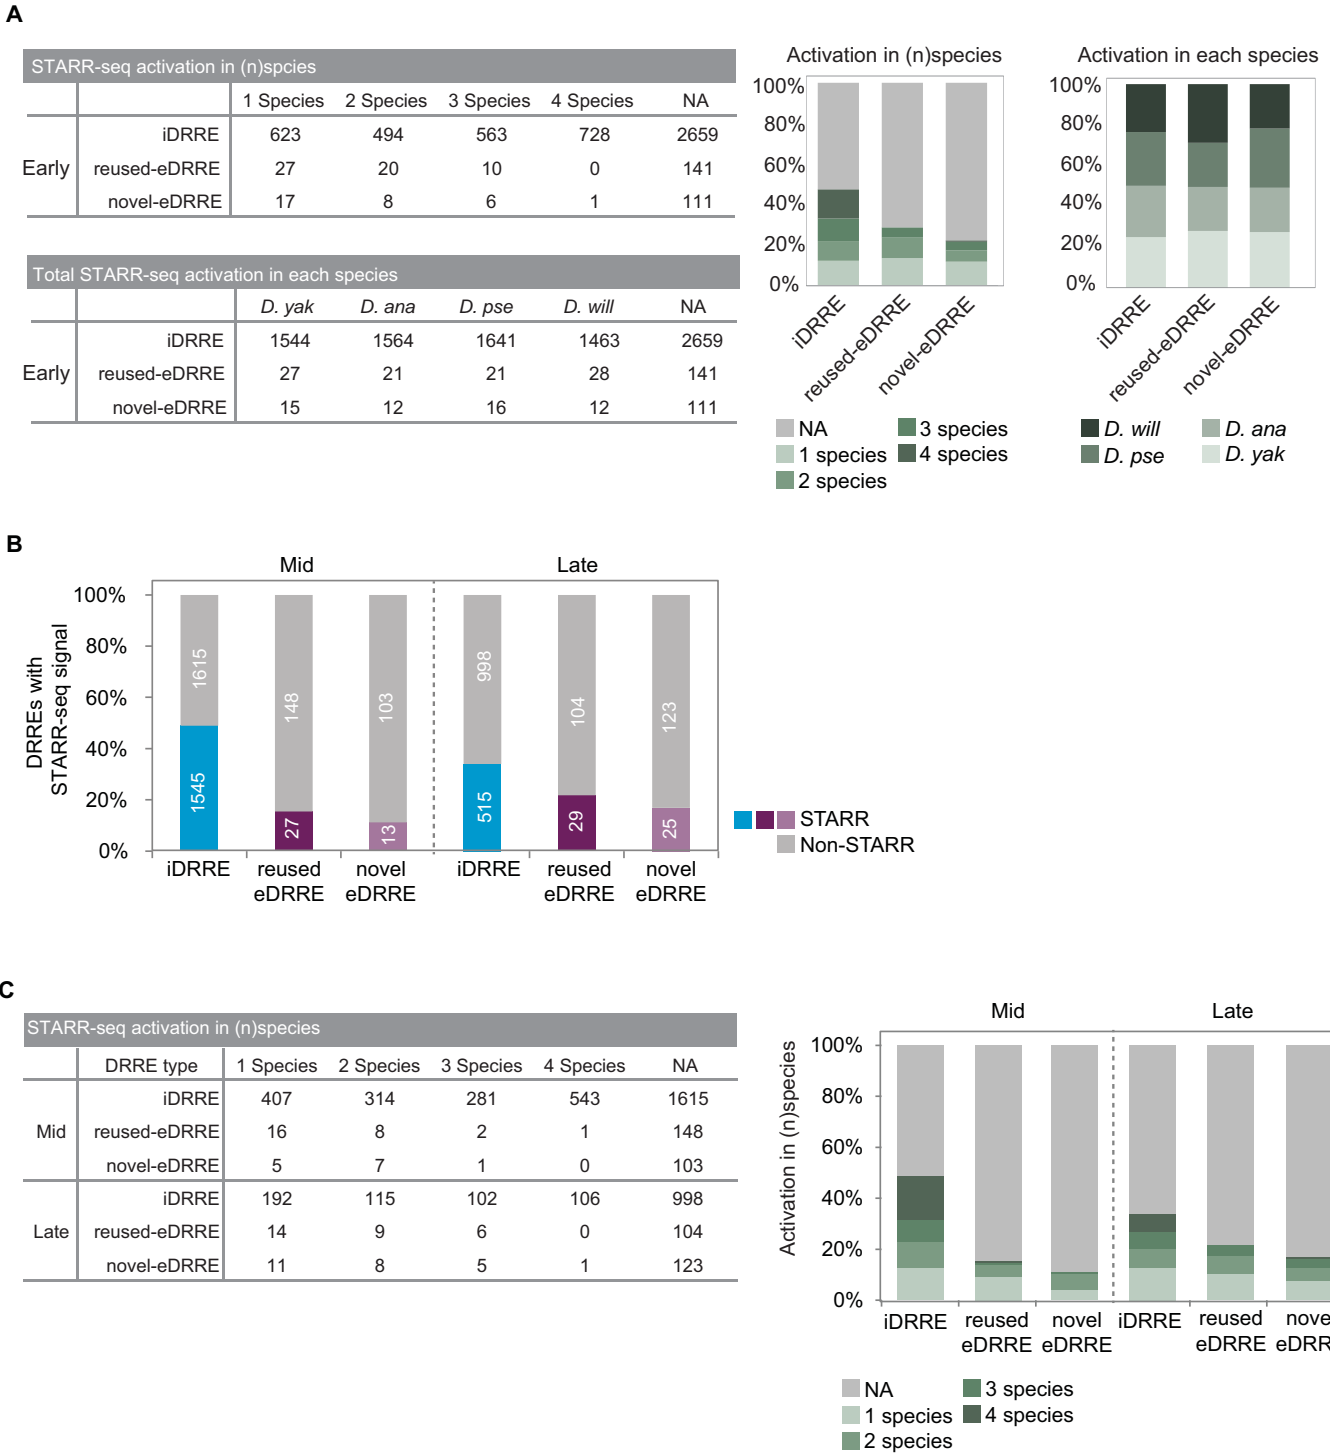

**Conservation of DRREs.** (A) Tables showing the number of species containing the same active enhancer (top) and the number of active enhancers present in each species (bottom) at the early time point. Bar plots showing the same numbers in percentage (right). (B) Percentage of conserved DRREs that are active at mid and late time points, according to the STARR-seq technique. (C) Tables showing the number of species containing the same active enhancer at the mid and late time points (left). Bar plots showing the same numbers in percentage (right).

## Supplemental Figure S17

**A**

|                          | Early      |            |      | Mid       |            |            | Late      |            |           |
|--------------------------|------------|------------|------|-----------|------------|------------|-----------|------------|-----------|
|                          | up         | NDE        | down | up        | NDE        | down       | up        | NDE        | down      |
| Mapped in both species   | 1269       | 5880       | 54   | 1154      | 5972       | 77         | 227       | 6625       | 351       |
| Only mapped in zebrafish | 19         | 133        | 2    | 23        | 128        | 3          | 5         | 141        | 8         |
| Only mapped in mouse     | 18         | 83         | 0    | 14        | 86         | 1          | 5         | 92         | 4         |
| non-mapped               | 691        | 5667       | 104  | 440       | 5909       | 113        | 380       | 5891       | 191       |
| total                    | 1997       | 11763      | 160  | 1631      | 12095      | 194        | 617       | 12749      | 554       |
| % mapped                 | 65.3980971 | 51.8235144 | 35   | 73.022685 | 51.1451013 | 41.7525773 | 38.411669 | 53.7924543 | 65.523466 |

|       | Chi-Value |        | <i>p</i> -value |           |
|-------|-----------|--------|-----------------|-----------|
|       | up        | down   | up              | down      |
| Early | 126.56    | 17.889 | 0               | 2.342E-05 |
| Mid   | 276.5     | 6.74   | 0               | 0.0094    |
| Late  | 55.9      | 29.44  | 0               | 6E-08     |

**B**

| Orthologs genes ratios |                                                        |           |        |
|------------------------|--------------------------------------------------------|-----------|--------|
|                        |                                                        | Zebrafish | Mouse  |
| 1                      | Mapped fly genes                                       | 7357      | 7304   |
| 2                      | All fly orthologs upregulated in                       | 2476      | 2347   |
|                        | Ratio 2/1                                              | 33.66%    | 32.13% |
| 3                      | Upregulated fly genes mapped                           | 1288      | 1287   |
| 4                      | Upregulated fly genes mapped to an upregulated gene in | 419       | 431    |
|                        | Ratio 3/4                                              | 32.53%    | 33.49% |

**C**

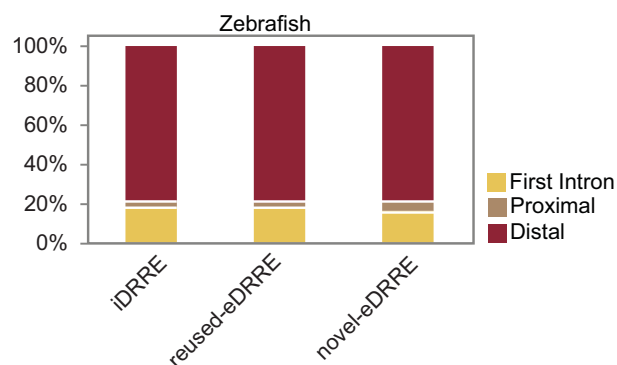

**Homology of genes implicated in fly regeneration.** (A) Table showing the number and percentage of DE fly genes that map to an ortholog in zebrafish, mouse or in both. Also it is shown the Chi-value and the *p*-value of the comparison between non-differentially expressed (NDE) and upregulated or downregulated genes in each time point. (B) Table showing ratios based on mapping statistics of shared regenerative genes. (C) Bar plot showing genomic distribution of the three types of DRREs identified in zebrafish.

## SUPPLEMENTAL FIGURES REFERENCES

Bieli D, Kanca O, Requena D, Hamaratoglu F, Gohl D, Schedl P, Affolter M, Slattery M, Müller M, Estella C. 2015. Establishment of a Developmental Compartment Requires Interactions between Three Synergistic Cis-regulatory Modules. *PLoS Genet* **11**: e1005376.

Harris RE, Setiawan L, Saul J, Hariharan IK. 2016. Localized epigenetic silencing of a damage-activated WNT enhancer limits regeneration in mature *Drosophila* imaginal discs. *Elife* **5**.
