# Supplementary material for: Damage-responsive elements in Drosophila regeneration
Source: Genome Res. 2018 Dec;28(12):1852–66. doi: 10.1101/gr.233098.117 (PMC6280756; doi:10.1101/gr.233098.117)
Supplement: Supplemental Material [file supp_gr.233098.117_Supplemental_Table_S2.xlsx]

## Sheet: Cluster List
Early Upregulated Clusters
chr	Begin	End	p-value	Upregulated genes inside cluster
chr2L	273836	297449	0.0442808	CG11555 CG17078 smo Hop
chr2L	415067	425321	0.000625668	CG11885 CG13690 BBS8 CG13692 ebi
chr2L	810577	851071	0.0243328	Nnf1b Dbp21E2 CG3662 drongo
chr2L	2359142	2380506	0.0319127	Rab5 CG3609 Atxn7
chr2L	2869652	2954406	0.00672512	NTPase CG8813 CG8814 lilli
chr2L	2977122	2987723	0.0470252	CG3165 CG9643 Chd1
chr2L	3159950	3171092	0.0319127	gkt Hydr2 CG44002
chr2L	6022951	6053877	0.00128281	CG12393 CG9135 CG31643 CG9107 mtm ade2
chr2L	6920704	6948808	0.019811	Hrb27C Fgop2 ihog
chr2L	7986786	8026898	0.000625668	Wwox Tg CG12560 Sirup Spn28Dc pes
chr2L	8071812	8116531	0.0107667	Bsg Trf MED20
chr2L	8305586	8311195	0.0470252	CG7840 CG7818 CG7810
chr2L	8370454	8411868	0.0176077	CG17292 CG31898 CG13384 CG13397 Wdr82 Rcd4 l(2)k12914
chr2L	8515096	8541439	0.011079	lmgA CG17834 lmgB PIG-U
chr2L	8977834	8999816	0.011079	CG13101 alien rost Try29F
chr2L	9984645	10002736	0.00468345	CG31875 bib SoYb
chr2L	10054213	10063925	0.019811	Pen Spn31A Cpr31A
chr2L	10207085	10269904	0.00128281	CG5731 me31B CG5694 CG5708 CG4953 CG31717 Prosalpha6 CG4957 Ror eEF1delta
chr2L	10362989	10393228	0.00390894	pim lft Cdk1 mRpS7 da
chr2L	10730255	10740762	0.0470252	CG17118 Dpy-30L1 CG12299
chr2L	10987806	11001476	0.0470252	CG12253 CG16833 aub
chr2L	11095150	11113061	0.0319127	Ge-1 l(2)gd1 CG6201
chr2L	12046711	12066775	0.00367539	RpL7-like JhI-21 CG14946 Plzf CG34164
chr2L	12693872	12707711	0.0243328	CG5780 CG15484 spict PICK1
chr2L	13165564	13182596	0.00390894	Sfmbt CG5287 Sir2 CG31849 CG5439
chr2L	13286777	13293415	0.019811	Uvrag CG31729 CG16824
chr2L	15044963	15070316	0.0107667	ck TfIIS vig
chr2L	17410641	17474773	0.0319127	Sgt BicD Dif CG5050 CG15141 dl
chr2L	18700606	18711297	0.00367539	Grip71 CG10343 CG10376 Faf
chr2L	19114401	19179758	0.00233854	CG10561 l(2)37Cg Ddc l(2)37Cb brat
chr2L	20058163	20097253	0.011079	mRpS18B barr CG10730 CG10747 fok vls
chr2R	6653217	6715892	0.00283315	Opbp Mob4 CG3270 Hsepi Tdc1 sced CG3409 geminin CG45092
chr2R	7510622	7532981	0.00797182	CG2144 az2 Orc1 Drat
chr2R	8087396	8123001	0.00206005	Cul4 CG8712 sut2 CG11210 Asap
chr2R	8914524	8939789	0.00480942	lin CG8248 Spt CG13749 FANCI
chr2R	9841080	9850642	0.0130748	Orc6 Vamp7 CG1667 CG1671
chr2R	10096480	10121451	0.0122905	Jra 14-3-3zeta dmpd
chr2R	10420414	10465701	0.0007807	Prx2540-1 CG33474 CG11825 CG12895 Galphao
chr2R	11280484	11309829	0.038958	CG9062 Fbl6 CG18336 CG7745
chr2R	12138695	12144552	0.0225209	CG18343 CG8378 OSCP1
chr2R	13160063	13198337	0.0198641	GLaz Kdm4B Nrk CG33137
chr2R	13573618	13593339	0.0225209	CG42808 CG6191 CG45088
chr2R	13954195	14060356	0.0130748	CG42806 CG6701 Ctf4 mRpL53 mam CG33155
chr2R	18658418	18673536	0.0225209	CG42306 Gint3 edl
chr2R	18833372	18862078	0.0130748	CG15098 CG18190 Jheh1 Jheh3 CG15084
chr2R	19430659	19485686	0.0130748	EloC Fak par-1 CG7744
chr2R	21666687	21691139	0.000219251	CG30285 CG42365 NC2alpha CG42497 Tim10 Tbp CG10307 CG10306
chr2R	24092079	24114292	0.0122905	CG4049 gek enok
chr3L	593246	606569	0.0283603	Reg-2 CG13893 MED14
chr3L	3803832	3810196	0.00687162	ntc IntS10 CG32262
chr3L	5803033	5813093	0.00687162	mad2 CG5537 CG42272
chr3L	7321099	7353622	0.0220256	RhoGEF4 mus312 lark CG14834 qm
chr3L	7970588	7977849	0.0283603	HP4 RNaseX25 CG8209
chr3L	8340314	8356296	0.0283603	DNApol-alpha50 CG7083 CG17352
chr3L	8402168	8472669	0.00116251	Cbl mkg-p CG33057 CG32354 Unr Gug CG13667
chr3L	8718949	8726108	0.0451377	SrpRbeta CG32022 CG6511
chr3L	9446864	9456281	0.0376634	CG3529 CG3448 ghi phol
chr3L	9834367	9859889	0.000233146	Cdk8 CG10809 RasGAP1 I-2
chr3L	10623066	10640136	0.0376634	CG42521 E(z) CG8009 CG18628
chr3L	11061571	11073348	0.0265021	Blos2 CG32075 CG6310 Mocs1
chr3L	11693879	11728118	0.0175921	crim CG11652 CG14132 CG11658 Bmcp
chr3L	11820338	11833578	0.0451377	CG11597 CG32095 CycA
chr3L	12116101	12138584	0.00438221	ssp yps Atg12 ND-SGDH l(3)j2D3 Lsp2
chr3L	14043694	14083229	0.00284456	CG13484 CG6833 Pex1 blue btl
chr3L	14747929	14761844	0.0283603	CG42507 Trl CG33260
chr3L	16085221	16112626	0.0376634	Taspase1 CG5235 CG5414 Zn72D
chr3L	17621824	17654280	0.0175921	Ndfip Krn CG43085 CG7510
chr3L	18112959	18145418	0.0283603	CG32195 CG7341 geko
chr3L	18745856	18801309	0.0283603	MED11 Atg3 ftz-f1
chr3L	19798975	19836413	0.00599033	CG14103 CG14102 trc CG34116 CG32221 Deaf1 Fibp
chr3L	20353449	20371746	0.0175921	CG5618 DNApol-alpha60 in CG13247
chr3L	22721203	22748614	0.0265021	mael CG11367 CG11241 CG7369
chr3R	4314455	4339914	0.0358337	Syt14 CG9795 CG1103
chr3R	5633627	5656336	0.0281829	CG12171 CG31546 MTA1-like MED27
chr3R	6350896	6380328	0.0358337	Pak CG42564 CG1024
chr3R	8712933	8735837	0.0385776	CG8112 nom M1BP CG8202
chr3R	8990645	9020022	0.00739358	E(var)3-9 CG11975 CG11983 CG11986 tgo
chr3R	9330885	9337459	0.0223317	CG8121 CG8866 CG16749
chr3R	9561583	9591002	0.0385776	CG9393 CG16789 CG9399 bocks
chr3R	9742877	9768984	0.00176352	CG31415 Snap24 MED6 PpD3 CG8412 CG34409
chr3R	10854501	10882188	0.000389722	CG14694 Tpc1 CG4511 Sodh-2 SelR CG4570 CG6574
chr3R	11620090	11650706	0.00788735	Csk CG14712 CG14710 CG18764
chr3R	11877235	11949129	0.0358337	sad mthl5 Cad87A
chr3R	12348987	12376572	0.000659951	GstD9 GstD10 CG10038 GstD1 GstD5 GstD3 CG10041 GstD4
chr3R	14302428	14320494	0.0223317	CG3259 RpII15 pr-set7
chr3R	15214762	15246614	0.00739358	CG31344 tefu Caf1 CG12241 Hsc70-4 SIDL
chr3R	16342318	16359466	0.000318671	Manf CG14879 CG17931 pad CG10311
chr3R	16432998	16458233	0.00739358	ema CG14881 CG14883 CG14882 CG17565
chr3R	18400373	18545586	0.0223317	CG12333 CG7685 fru
chr3R	20617883	20644279	0.0121845	CG5466 Pi3K92E Lrrk
chr3R	21362968	21373575	0.0358261	pre-mod(mdg4)-AB pre-mod(mdg4)-AE pre-mod(mdg4)-X pre-mod(mdg4)-AA
				pre-mod(mdg4)-O
chr3R	22375923	22392349	0.0385776	CG18596 CG34149 CG43342 CG7059
chr3R	22411301	22424929	0.0121845	lqfR mats pinta
chr3R	24760530	24814012	0.0358337	CG5807 Ude CG5805 AstA CG13631
chr3R	24871202	24894605	0.0223317	CG3744 CG31381 CG31121
chr3R	25053369	25102146	0.00285448	CG11920 CG11836 CG33095 CG31111 CG9996 CG31109
chr3R	25997621	26098711	0.000579755	CG42498 E(spl)m2-BFM E(spl)m4-BFM E(spl)m3-HLH E(spl)m5-HLH E(spl)mbeta-HLH
				E(spl)m6-BFM E(spl)malpha-BFM CG14550 dys E(spl)mdelta-HLH CG14551 gro
chr3R	26842462	26871995	0.00203738	Lerp IntS12 His2Av BM-40-SPARC
chr3R	27256595	27282661	0.0196619	woc CG14262 CG5934 mrt
chr3R	29928701	29934587	0.0196619	CG42558 Cog7 alpha-Man-Ic CG42557
chr3R	31236035	31254900	0.0358337	qless mRpL32 CG1750
chrX	1329518	1357601	0.0346818	Tsp2A png CG12773 CG11409
chrX	1890256	1930517	0.0227564	mRpL16 arm CG32801 Rbcn-3B CG11596 Ocrl
chrX	2617758	2679553	0.00140475	Tsp3A Seipin PI4KIIIalpha sgg
chrX	5690002	5738031	0.0346818	cv CG4096 CG32758
chrX	7725996	7739978	0.00377028	Tom40 NELF-B CG12155 Rab39
chrX	9216872	9232378	0.0141067	CG12121 CG15369 CG15370 t
chrX	10764878	10824277	0.000691772	CG15211 Atg8a Imp BTBD9 Ant2
chrX	11089290	11094947	0.0346818	Vago CG2076 CG2061
chrX	11144120	11164670	0.0340111	CG15201 Ran Lint-1 Dlic
chrX	11355881	11409776	0.000221981	hop dlg1 dsh Pa1 Tim8
chrX	11561643	11573640	0.00960545	CG11699 PGRP-SA Kmn1 CG11697 RpII215
chrX	11792533	11837460	0.019226	CkIIbeta CG1578 rudhira
chrX	11990118	12020719	0.00787497	CG1492 CG18130 CG1806 CG15735
chrX	13288051	13329303	0.0346818	CG15744 CG1622 IP3K2
chrX	15446179	15466812	0.0227564	Scamp shtd CG6294 CG6299
chrX	15697494	15712309	0.0340111	CG9281 Pis CG8128 CG15601
chrX	16385278	16399850	0.0346818	CG4239 mei-41 TH1
chrX	16422831	16448302	0.0346818	hang rngo CG34015
chrX	18078491	18101314	0.0346818	CG7536 dik CG7192
chrX	18843663	18888860	0.00787497	CG34401 CG34422 CG7332 CG7326 Usp39
chrX	19676061	19701755	0.000120922	Ubqn CG14227 CG14231 dome Cdc42 CG14229
chrX	21023390	21041467	0.019226	r-cup CG1529 Ntf-2
Early Downregulated Clusters
chr	Begin	End	p-value	Downregulated genes inside cluster
chr2R	8430115	8436095	0.000125486	Lcp1 Lcp3 Lcp2
chr2R	9237512	9253255	2.30615	Cyp4p2 Cyp4p1 CG30343
chr3L	9371511	9374964	0.000240928	Hsp67Bb Hsp67Bc Hsp22
chr3R	12502510	12511461	0.529974	Hsp70Bb Hsp70Bc Hsp70Bbb
Mid Upregulated Clusters
chr	Begin	End	p-value	Upregulated genes inside cluster
chr2L	252589	282167	0.00484885	CG3645 mbm CG17078 smo
chr2L	404285	418536	0.0171815	RpI135 AP-2alpha ebi
chr2L	1129316	1166425	0.0154686	MFS3 Vps29 IntS14 CG4552 Tfb4
chr2L	2372455	2384747	0.0485001	CG3609 CG9870 CG15390
chr2L	4361925	4386062	0.010482	Traf4 CG17612 CG3338
chr2L	4442870	4453038	0.0362114	morgue Elp3 CG15439
chr2L	4821774	4850419	0.0257572	CG15628 tank mRpS2
chr2L	4955509	4981592	0.0432287	Marcal1 CG34125 mRpL28 CG8892
chr2L	5521281	5546642	0.0272583	Cap-D3 CG7371 CG6907 Lam
chr2L	6908083	6918743	0.010482	nop5 Wee1 Rat1
chr2L	6945464	6964074	0.00221584	CG13775 SA sip2 ihog CG3430
chr2L	7426866	7445882	0.00559711	CG5973 CG5261 CG5958
chr2L	7986786	8007210	0.0362114	pes Wwox Spn28Dc
chr2L	8363477	8382807	0.00676446	CG13392 Aats-ala Wdr82 Pp2A-29B RpS13
chr2L	8509069	8528618	6.16581	CG13097 lmgA CG13090 lmgB CG13096 PIG-U
chr2L	9954325	9968645	0.0362114	CG4709 Dref RpL13
chr2L	10302173	10323102	0.011051	CG4972 CG5381 Usp14 nmd
chr2L	10373369	10393228	0.0485001	CG33303 CG5096 da
chr2L	10970443	10997897	0.0362114	YL-1 CG16833 abo
chr2L	12690336	12712952	0.011051	CG5776 CG5787 CG6153 CG5525
chr2L	13812700	13831576	0.0362114	CG16888 Arpc1 Orc5
chr2L	15749319	15768349	0.0257572	ND-B17 l(2)35Df wek
chr2L	19110154	19131954	0.00753788	l(2)37Cc Aats-asn amd l(2)37Cb
chr2L	19435850	19453490	0.0171815	CG10237 RanGAP Top2
chr2L	20058163	20096253	0.00484885	barr nesd pr neb lok
chr2L	21084605	21102429	0.0362114	CG33509 ppk13 CG12050
chr2L	21154293	21182812	0.0272583	E2f2 Nbr CG9246 Mcm10
chr2R	5754517	5774324	0.00352019	CG7791 l(2)09851 Gp210
chr2R	6074471	6085625	0.00815841	Ars2 CG14590 CG7845
chr2R	6633647	6656594	0.00254924	Trap1 Debcl Opbp geminin
chr2R	6693430	6715892	0.0364891	CG3270 CG3409 CG45092
chr2R	7440706	7477162	0.00398605	CG11125 Aldh-III CG11123 sPLA2 Inos
chr2R	7496702	7539696	0.000130792	CG2144 CG1603 CG1598 Orc1 dpa Drat CG1602
chr2R	7791901	7815486	0.02457	Gapdh1 CG1550 CG1882
chr2R	8102260	8156654	0.000814588	Nup50 Cul4 coil Pbp49 kermit Obp44a
chr2R	8421033	8447164	0.0120292	CSN7 Lcp4 Lcp1 Cyp4e2
chr2R	8898729	8951086	0.00202928	CG8243 CG8229 FANCI CG8230 Pgi ana2 CG30349 CG8258 CG8235 MrgBP
chr2R	10063385	10084210	0.0364891	CG2292 cdc2rk egr
chr2R	10875748	10886375	0.02457	nclb Taf5 CG18004
chr2R	11886067	11895762	0.00815841	Ef1alpha48D cuff ERp60
chr2R	12453190	12471722	0.00352019	CG8545 dgt5 Lac
chr2R	13580313	13596557	0.02457	fand CG45088 CG6191
chr2R	14243778	14270658	0.00254924	Hsc70-5 CG8503 SelD CG8531
chr2R	16322186	16347500	0.0364891	CG4282 CG7997 wcd
chr2R	17420407	17430963	0.0364891	Bap55 CG6550 l(2)k01209
chr2R	20550334	20562331	0.02457	CG13430 lms Mgat1
chr2R	21658770	21688545	8.99096	CG30285 CG9865 CG42380 CG42379 NC2alpha CG42381 Rae1 Tbp CG42364
chr2R	22636063	22661389	0.0102752	RpS24 Ugt58Fa CG43326 bonsai Cdk9 CG42565
chr2R	23055474	23074725	0.00118431	PPO3 CG44252 l(2)k09913 Fib CG9890
chr2R	23847161	23877442	0.00853629	Thiolase eIF6 gbb CG5569 ytr ken
chr2R	24133989	24186343	0.0151325	Nop60B spag Zfrp8 CG3328 Dat
chr3L	677879	699144	0.03057	CG17129 ebd1 CG13894
chr3L	1534929	1576330	0.0204825	Pex10 CG12099 CG12091 CG12004
chr3L	1862881	1891462	0.000115796	Tmhs dre4 CG12025 CG13937 HBS1
chr3L	3145405	3172545	0.00948528	CG14963 CG15812 CG32281 Asciz Usp5
chr3L	3899259	3935617	7.08533	ida Ubi-p63E mge Sc2 Eip63F-1
chr3L	4134860	4152473	0.0204825	CG1299 Rop RfC4
chr3L	4242734	4288349	0.0204825	CG1309 TfIIEbeta pav CG11583 CG1311 CG15011
chr3L	8110368	8151813	0.03057	Uba2 CG13676 ldbr CG7927
chr3L	8176135	8191118	0.0427896	Nmt ERR Atg18a
chr3L	8340314	8360906	0.0125519	DNApol-alpha50 Idh CG7182
chr3L	8402168	8422205	0.03057	mkg-p Exo70 CG32354
chr3L	9334332	9358935	0.0125519	PGRP-LA PGRP-LC UGP
chr3L	9717786	9733807	0.0138402	CG18178 CG14174 defl CG6749
chr3L	10623066	10640136	0.00186422	CG18628 CG8009 CG42521 E(z) hay
chr3L	11070526	11100578	0.03057	Mocs1 CG7839 APP-BP1
chr3L	13009399	13044234	0.0192817	SRm160 CG11267 Zmynd10 CG11261 ste14 RpS4
chr3L	16415292	16496560	0.00673285	CG4573 CG33158 Aats-tyr
chr3L	16583028	16615472	0.0192817	spd-2 CG32164 Rpn12 Prosbeta6 Mo25
chr3L	19544345	19584568	0.03057	l(3)76BDr CG9300 Shal
chr3L	19589072	19612199	0.0427896	CG14100 Taf6 Lon
chr3L	19912405	19927175	0.00613081	Rpn1 Su(z)12 Grasp65 Mtr3
chr3L	20356807	20371746	0.0427896	kin17 DNApol-alpha60 CG13247
chr3L	21821997	21836685	0.0427896	CycH CG7148 Nopp140
chr3L	22263369	22292810	0.0204825	Ddx1 CG11523 Aats-ile
chr3R	5589601	5601136	0.018689	Vha26 kra noi
chr3R	8240747	8279274	0.0011648	RpA-70 CG9636 CG9630 ato CG33722 Mcm2
chr3R	8801564	8827279	0.0157157	Tcp-1eta CG9839 CG8369 CG8379
chr3R	9763650	9789323	0.0413836	CG8478 MED6 MtnA CG8500
chr3R	10766622	10791150	0.00828791	Art1 TfIIFbeta Mcm5 CG45076 mRpL37
chr3R	10853374	10878257	0.0011648	CG6567 CG4511 Sodh-2 SelR CG4570 CG6574
chr3R	11650971	11679690	0.018689	Elp1 CG14715 Taf12
chr3R	12352143	12374824	0.0161674	MBD-R2 GstD9 GstD1 GstD2 GstD4
chr3R	12403340	12429282	0.0312003	Cyp9f2 CG5167 Pp1-87B CG5641
chr3R	12456573	12465298	0.00339803	CG12267 CG5608 CG5961 trus
chr3R	12502510	12511461	0.0101392	Hsp70Bc Hsp70Bbb Hsp70Bb
chr3R	14892392	14923083	0.0157157	CG7265 Nup93-2 CG3817 Sdr
chr3R	15209204	15230516	0.00558043	mRpS10 Caf1 CG4203 CG12241 SIDL
chr3R	15343653	15367665	0.0117863	CG34404 CG42727 CG31301 CG42726 Surf4
chr3R	16264271	16304768	0.0101392	Mat89Ba asun gish
chr3R	16432998	16445010	0.0226603	CG14881 ema CG14882 CG17565
chr3R	16640205	16649978	0.0445141	CG10324 nonA-l Cctgamma
chr3R	17532325	17546531	0.000578437	Prx3 CG5823 P5cr-2 l(3)07882
chr3R	18216142	18242159	0.437572	mTerf5 Non3 CG7183 CG7988 CG7156 Mdh2 CG14314
chr3R	20535323	20564067	0.018689	CG10877 Stat92E att-ORFA CG5180
chr3R	22408566	22423302	0.0445141	CG13850 Nop56 mats
chr3R	22687542	22700307	0.018689	wfs1 Nup133 Cyp6d4
chr3R	23752876	23767488	0.00356271	Rpt5 CG10217 CG10214 Lsd-1 Plip
chr3R	24128049	24167763	0.089341	Apc2 CG5463 Kal1 Slimp Sec10 Tsc1 p38a p38c
chr3R	24913216	24934919	0.0312003	PIG-S sud1 Mink CG11771
chr3R	25117218	25131155	0.0011648	Mocs2 CG31510 vig2 Clbn CG42503
chr3R	26041736	26059267	0.00558043	CG42498 gro CG14550 RpL34a CG14543
chr3R	26715165	26725216	0.0101392	CG6425 CG6420 CG5484
chr3R	27913777	27924888	0.0101392	CG5003 CG33213 RpL4 CG12259
chr3R	27948711	27988384	0.00558043	CG4884 Gp93 CG4849 betaTub97EF CG4951
chr3R	29034573	29062975	0.0413836	Cpsf100 Slu7 CG11837 Cul5
chr3R	29116391	29130972	0.018689	dgt6 Atg14 yem
chrX	1028291	1047009	0.0146617	CDC45L CG14630 CG42259
chrX	1457175	1472325	0.0402943	Lrpprc2 Ns3 pck O-fut2
chrX	4097592	4117487	0.0493901	CG6379 Nsun2 Tip60
chrX	6276876	6301285	0.0310991	Ubi-p5E Rpt4 CG3815 CG12219
chrX	6674387	6698567	0.0115438	Pink1 Mcm6 CG14440 CG3184
chrX	7725996	7739978	0.0146617	Tom40 NELF-B CG12155
chrX	8117012	8137046	0.00243792	CG2116 CG2120 CG2260 CG1575
chrX	8461479	8469012	0.0354244	Es2 Sptr CG12116
chrX	10852446	10877893	0.0146617	feo sofe CG1637
chrX	15328342	15344625	0.0238295	dah CG9123 CG12608
chrX	16296671	16308667	0.0354244	CG9914 CG3632 CG3679
chrX	18085761	18116922	0.0354244	dik Taf8 wupA
chrX	18648182	18657286	0.0146617	CG6659 Ing3 CG6540
chrX	19475063	19509350	0.0232709	CG12200 Nat1 ND-18 Pfrx
chrX	19731004	19750167	0.000769137	Rpp20 COX6B AP-1-2beta Alr CG33932
chrX	20148124	20173514	0.00243792	CG9572 Phf7 AnxB10 CG9577 CG9581
chrX	20239855	20251093	0.0238295	Peritrophin-A obst-A CG17068
Mid Downregulated Clusters
chr	Begin	End	p-value	Downregulated genes inside cluster
chr2L	16292010	16302954	0.000119925	GMF CG13258 Cyp303a1
chr2R	7823943	7830429	0.000282583	CG18853 CG30383 phr
chr3L	9358999	9374964	0.000573051	CG32039 Hsp67Bc Hsp67Bb
chr3R	21354445	21373575	0.00411446	pre-mod(mdg4)-J pre-mod(mdg4)-O pre-mod(mdg4)-N pre-mod(mdg4)-P
				pre-mod(mdg4)-G pre-mod(mdg4)-Y
chr4	1172469	1196848	0.00211495	pho CG33521 PIP4K
Late Upregulated Clusters
chr	Begin	End	p-value	Upregulated genes inside cluster
chr2L	3692123	3713105	0.000627931	CG31955 CG16712 CG16704 CG16713 CG31777
chr2L	8190297	8215239	0.0179706	CG34134 CG8360 CG8353
chr2L	10681030	10689271	6.11318	CG17105 CG7296 CG7299 CG7294
chr2L	13965012	13976769	0.000107351	NimC1 He NimB3 NimB2
chr2L	14737090	14745210	0.000267612	CG34166 CG42586 CG31775 CG42587
chr2R	6693430	6715892	0.00373669	CG3409 CG3270 CG45092
chr2R	7042656	7057548	0.0129285	Tsp42El Tsp42Ep Tsp42Ek
chr2R	8430115	8447164	2.93173	Lcp1 Lcp4 Cyp4e2 Lcp3 Lcp2
chr2R	11248126	11275286	0.0012476	CG34227 Cpr47Eb Cpr47Ec Cpr47Ee TpnC47D
chr2R	17136451	17140865	0.00235815	CG43107 CG43103 Gbp CG11395
chr2R	22640526	22668848	0.0301232	RpS24 CG4250 Ugt58Fa CG43326 CG3746 CG42565 CG30196 CG30269 Cyp6d2
chr2R	23356372	23360266	0.00751336	CG3500 CG34423 CG34424
chr3L	3291459	3317144	0.00255298	CG12009 CG14968 Drsl5
chr3L	8202792	8222953	0.00124375	CG13679 CG8012 CG13678
chr3L	16271282	16303178	0.000291458	CG13044 CG13067 CG13046 CG4962 CG13045
chr3R	11983098	12003516	0.00103978	mfas Ect3 CG3397
chr3R	12360008	12408107	1.13624	GstD2 GstD9 GstD10 CG5167 GstD1 CG4115 lig3 Cyp9f2 GstD4
chr3R	12682186	12697379	0.0040073	NijC CG31347 kar
chr3R	21354445	21370249	0.000996138	pre-mod(mdg4)-W pre-mod(mdg4)-AD pre-mod(mdg4)-C pre-mod(mdg4)-I
				pre-mod(mdg4)-B
chr3R	24859900	24867651	8.10206	CG13641 CG13640 CG7016 Elal CG13639
chr3R	25291370	25316116	0.0121753	CG31098 CG31370 CG10559
chrX	1031496	1052631	0.000553943	CG14630 CG42259 CG14629
chrX	1464363	1483413	0.00165064	Rab27 CG14777 sta O-fut2
chrX	10839230	10848534	0.00182998	CG15209 CG17333 CG15210
chrX	11555050	11573640	0.000596142	CG11699 PGRP-SA CG1572 CG11697
chrX	15450261	15475400	0.00769044	Ahcy13 CG15642 mh
Late Downregulated Clusters
chr	Begin	End	p-value	Downregulated genes inside cluster
chr2L	7030493	7065837	0.000439812	CG31907 Nuf2 Mnn1 Rab30
chr2L	10207085	10261049	0.644902	CG5731 mthl15 Pten me31B CG5694 CG5708 eEF1delta
chr2L	10362989	10386262	0.00618328	pim lft Cdk1
chr2L	10414017	10441047	0.00123746	Klp31E TfIIB Nse4 CHIP
chr2L	21614232	21647964	0.000439812	CG2201 Df31 Ac3
chr2R	5339706	5354723	0.000106304	CG10465 CG10395 COX4L
chr2R	7823943	7828678	0.00199695	Prosalpha1 CG30383 phr
chr2R	12593604	12623197	0.000259887	Amph CG45086 Galphaq
chr3L	7357275	7373711	0.0039058	pst akirin Sh3beta
chr3L	8424954	8449377	0.000214337	Cbl Unr CG6983
chr3L	9371511	9382765	0.0147055	Hsp67Bb Hsp67Bc Hsp23
chr3L	15818734	15837482	0.000128239	dbo CG15715 CG18081 DCP2
chr3L	21507852	21533713	0.00267853	M6 SAK Mkrn1
chr3R	21355692	21373575	0.00216529	pre-mod(mdg4)-J pre-mod(mdg4)-X pre-mod(mdg4)-O pre-mod(mdg4)-Y
chr4	1172469	1224467	0.00258956	CG33521 Mitf PIP4K pho
chrX	15841769	15866175	0.00150001	Aats-arg AlkB Gbeta13F

## Sheet: Hotspot_List
Early Upregulated Hotspots
chr	Begin	End	p-value
chr2L	273836	851071	0.338655
chr2L	2359142	3171092	0.0693084
chr2L	7986786	8999816	0.1844
chr2L	9984645	11113061	0.192654
chr2L	12693872	13293415	0.192654
chr2R	9841080	10465701	0.192654
chr2R	13160063	14060356	0.192654
chr2R	18658418	19485686	0.0693084
chr3L	7970588	8726108	0.48233
chr3L	11061571	12138584	0.0693084
chr3R	8712933	9768984	0.09532
chr3R	11620090	12376572	0.338655
chr3R	24760530	25102146	0.48233
chrX	10764878	12020719	0.0211217
chrX	15446179	16448302	0.313069
Mid Upregulated Hotspots
chr	Begin	End	p-value
chr2L	252589	1166425	0.489332
chr2L	4361925	5546642	0.029133
chr2L	6908083	8528618	0.344619
chr2L	9954325	10997897	0.801204
chr2L	19110154	20096253	0.344619
chr2R	5754517	8951086	0.0710268
chr3L	3145405	4288349	0.0710268
chr3L	8110368	9358935	0.443173
chr3L	19544345	20371746	0.196708
chr3R	10766622	12511461	0.319839
chr3R	14892392	15367665	0.196708
chr3R	16264271	16649978	0.344619
chr3R	24128049	25131155	0.616452
chrX	7725996	8469012	0.196708
chrX	19475063	20251093	0.0710268
Late Upregulated Clusters
chr	Begin	End	p-value
chr3R	11983098	12697379	0.0348965
Late Upregulated Clusters
chr	Begin	End	p-value
chr2L	10207085	10441047	0.012161
