# Supplementary material for: Damage-responsive elements in Drosophila regeneration
Source: Genome Res. 2018 Dec;28(12):1852–66. doi: 10.1101/gr.233098.117 (PMC6280756; doi:10.1101/gr.233098.117)
Supplement: Supplemental Material [file supp_gr.233098.117_Supplemental_Table_S3.xlsx]

## Sheet: ATACSeq
id	coordinates	peak_distribution	genomic_region	early_classification	mid_classification	late_classification	L3_concordance_replicates	H3K4me1	H3K27ac	PolII	active_enhancer_features
PEAK000001	chr2L:10002435-10002583	proximal	exon	discordant	discordant	iDRRE	concordant	not_marked	not_marked	not_marked	absence
PEAK000002	chr2L:10003717-10003920	core-promoter	exon;intergenic	iDRRE	flat	flat	concordant	marked	marked	marked	presence
PEAK000003	chr2L:10004553-10004945	core-promoter	exon	flat	flat	flat	concordant	marked	marked	marked	presence
PEAK000004	chr2L:10009318-10009426	core-promoter	exon;intergenic	discordant	discordant	flat	concordant	not_marked	marked	not_marked	presence
PEAK000005	chr2L:10009916-10010342	first-intron	intron	iDRRE	flat	flat	concordant	not_marked	marked	not_marked	presence
PEAK000006	chr2L:10032489-10032815	core-promoter	exon;intron;intergenic	flat	flat	flat	concordant	not_marked	not_marked	marked	presence
PEAK000007	chr2L:10034386-10034687	proximal	intron	flat	discordant	discordant	concordant	marked	marked	not_marked	presence
PEAK000008	chr2L:10035434-10035718	distal	intron	flat	flat	flat	concordant	not_marked	marked	not_marked	presence
PEAK000009	chr2L:10035953-10036152	distal	intron	discordant	flat	flat	concordant	not_marked	marked	not_marked	presence
PEAK000010	chr2L:10045023-10045201	distal	intergenic	flat	flat	flat	concordant	not_marked	not_marked	not_marked	absence
PEAK000011	chr2L:10053809-10054080	proximal	exon	flat	flat	flat	concordant	not_marked	not_marked	not_marked	absence
PEAK000012	chr2L:10054167-10054354	core-promoter	exon;intergenic	higher_peak	flat	discordant	concordant	marked	not_marked	not_marked	presence
PEAK000013	chr2L:10056815-10057082	core-promoter	exon;intergenic	flat	flat	flat	concordant	not_marked	marked	marked	presence
PEAK000014	chr2L:10057211-10057598	first-intron	intron	flat	iDRRE	discordant	concordant	marked	marked	marked	presence
PEAK000015	chr2L:1006582-1006814	distal	intergenic	flat	lower_peak	flat	concordant	marked	marked	marked	presence
PEAK000016	chr2L:1007129-1008157	distal	intergenic	flat	iDRRE	flat	concordant	marked	marked	marked	presence
PEAK000017	chr2L:10143295-10143466	proximal	intron	iDRRE	flat	flat	concordant	marked	marked	marked	presence
PEAK000018	chr2L:10200934-10201143	core-promoter	exon;intergenic	iDRRE	flat	flat	concordant	marked	marked	marked	presence
PEAK000019	chr2L:10204265-10204377	core-promoter	exon;intergenic	flat	discordant	discordant	concordant	not_marked	not_marked	not_marked	absence
PEAK000020	chr2L:10208960-10209189	first-intron	exon	iDRRE	flat	flat	concordant	not_marked	not_marked	not_marked	absence
PEAK000021	chr2L:10220826-10221009	first-intron	exon;intron	iDRRE	discordant	discordant	concordant	not_marked	marked	marked	presence
PEAK000022	chr2L:10221239-10221426	core-promoter	exon;intergenic	flat	flat	flat	concordant	marked	marked	marked	presence
PEAK000023	chr2L:102226-102417	core-promoter	exon;intergenic	discordant	flat	flat	concordant	not_marked	marked	marked	presence
PEAK000024	chr2L:10226285-10226432	first-intron	intron	iDRRE	flat	flat	concordant	not_marked	not_marked	not_marked	absence
PEAK000025	chr2L:10226763-10226904	core-promoter	exon;intergenic	iDRRE	flat	discordant	concordant	not_marked	not_marked	not_marked	absence
PEAK000026	chr2L:10231607-10231773	core-promoter	exon;intergenic	iDRRE	discordant	discordant	concordant	not_marked	not_marked	not_marked	absence
PEAK000027	chr2L:1024654-1024949	proximal	intron	flat	flat	flat	concordant	not_marked	not_marked	not_marked	absence
PEAK000028	chr2L:10246737-10246851	first-intron	intron	discordant	discordant	flat	concordant	not_marked	marked	not_marked	presence
PEAK000029	chr2L:10246985-10247191	core-promoter	exon;intergenic	iDRRE	flat	flat	concordant	not_marked	marked	not_marked	presence
PEAK000030	chr2L:10249720-10250125	first-intron	exon;intron	iDRRE	flat	flat	concordant	not_marked	not_marked	not_marked	absence
PEAK000031	chr2L:10250454-10250536	core-promoter	exon;intergenic	discordant	no_peak	no_peak	concordant	not_marked	marked	marked	presence
PEAK000032	chr2L:10255862-10256015	core-promoter	exon;intergenic	discordant	discordant	flat	concordant	higher_signal	not_marked	not_marked	presence
PEAK000033	chr2L:10259964-10260284	first-intron	exon;intron	iDRRE	flat	flat	concordant	not_marked	not_marked	not_marked	absence
PEAK000034	chr2L:10260971-10261156	core-promoter	exon;intergenic	discordant	discordant	discordant	concordant	not_marked	not_marked	not_marked	absence
PEAK000035	chr2L:10263521-10263688	core-promoter	exon;intergenic	iDRRE	flat	flat	concordant	marked	marked	marked	presence
PEAK000036	chr2L:10265258-10265382	core-promoter	exon;intergenic	iDRRE	discordant	flat	concordant	not_marked	not_marked	not_marked	absence
PEAK000037	chr2L:10269939-10270082	core-promoter	exon;intergenic	flat	flat	flat	concordant	marked	marked	marked	presence
PEAK000038	chr2L:10277522-10277667	proximal	exon;intron	iDRRE	flat	flat	concordant	not_marked	not_marked	not_marked	absence
PEAK000039	chr2L:10292315-10292458	core-promoter	exon;intergenic	iDRRE	flat	flat	concordant	not_marked	not_marked	not_marked	absence
PEAK000040	chr2L:10295390-10295579	core-promoter	intergenic	iDRRE	flat	flat	concordant	not_marked	not_marked	not_marked	absence
PEAK000041	chr2L:10303860-10304017	core-promoter	exon;intergenic	iDRRE	discordant	flat	concordant	marked	marked	marked	presence
PEAK000042	chr2L:10306522-10306665	core-promoter	exon;intergenic	discordant	discordant	discordant	concordant	not_marked	marked	not_marked	presence
PEAK000043	chr2L:10306822-10307016	core-promoter	exon;intergenic	iDRRE	flat	flat	concordant	not_marked	marked	marked	presence
PEAK000044	chr2L:10312067-10312204	core-promoter	exon;intergenic	discordant	discordant	discordant	concordant	marked	marked	marked	presence
PEAK000045	chr2L:10314354-10314491	core-promoter	exon;intergenic	iDRRE	flat	flat	concordant	not_marked	marked	marked	presence
PEAK000046	chr2L:10327885-10328036	core-promoter	exon;intergenic	discordant	discordant	flat	concordant	not_marked	marked	not_marked	presence
PEAK000047	chr2L:10333614-10333705	core-promoter	intergenic	discordant	discordant	discordant	concordant	not_marked	marked	marked	presence
PEAK000048	chr2L:10334653-10335307	first-intron	exon;intron	iDRRE	flat	flat	concordant	marked	marked	marked	presence
PEAK000049	chr2L:10339337-10339526	core-promoter	exon;intergenic	flat	flat	flat	concordant	not_marked	marked	marked	presence
PEAK000050	chr2L:10341513-10341712	core-promoter	exon;intergenic	iDRRE	flat	flat	concordant	not_marked	not_marked	not_marked	absence
PEAK000051	chr2L:10356704-10356909	core-promoter	exon;intergenic	iDRRE	discordant	lower_peak	concordant	not_marked	marked	marked	presence
PEAK000052	chr2L:10362674-10362778	core-promoter	exon;intergenic	discordant	no_peak	discordant	concordant	marked	marked	marked	presence
PEAK000053	chr2L:10364365-10364535	core-promoter	exon;intergenic	iDRRE	iDRRE	lower_peak	concordant	not_marked	not_marked	not_marked	absence
PEAK000054	chr2L:10364757-10364869	first-intron	intron	discordant	discordant	discordant	concordant	higher_signal	not_marked	not_marked	presence
PEAK000055	chr2L:10366604-10366807	core-promoter	exon;intergenic	iDRRE	discordant	flat	concordant	marked	marked	marked	presence
PEAK000056	chr2L:10375701-10375844	core-promoter	exon;intergenic	flat	iDRRE	discordant	concordant	not_marked	marked	marked	presence
PEAK000057	chr2L:10380015-10380147	core-promoter	exon;intergenic	iDRRE	flat	discordant	concordant	marked	marked	marked	presence
PEAK000058	chr2L:10386231-10386337	core-promoter	exon;intergenic	discordant	discordant	discordant	concordant	not_marked	marked	marked	presence
PEAK000059	chr2L:10386594-10386737	core-promoter	exon;intergenic	discordant	discordant	no_peak	concordant	not_marked	marked	marked	presence
PEAK000060	chr2L:10387988-10388135	core-promoter	exon;intergenic	iDRRE	flat	flat	concordant	not_marked	not_marked	marked	presence
PEAK000061	chr2L:10408214-10408400	core-promoter	exon;intergenic	discordant	discordant	lower_peak	concordant	not_marked	marked	marked	presence
PEAK000062	chr2L:10413420-10413520	core-promoter	exon;intergenic	discordant	no_peak	discordant	concordant	not_marked	marked	marked	presence
PEAK000063	chr2L:10413789-10414082	core-promoter	exon;intergenic	iDRRE	flat	flat	concordant	not_marked	not_marked	not_marked	absence
PEAK000064	chr2L:10419075-10419214	core-promoter	exon;intergenic	discordant	flat	discordant	concordant	marked	marked	marked	presence
PEAK000065	chr2L:10422748-10422874	core-promoter	exon;intergenic	discordant	discordant	flat	concordant	not_marked	marked	not_marked	presence
PEAK000066	chr2L:10430843-10431032	core-promoter	exon;intergenic	flat	iDRRE	flat	concordant	marked	marked	marked	presence
PEAK000067	chr2L:10457477-10457887	core-promoter	exon;intergenic	iDRRE	iDRRE	flat	concordant	not_marked	not_marked	not_marked	absence
PEAK000068	chr2L:10474255-10474431	core-promoter	exon;intergenic	iDRRE	flat	flat	concordant	not_marked	not_marked	marked	presence
PEAK000069	chr2L:10479935-10480036	first-intron	intron	discordant	discordant	iDRRE	concordant	not_marked	not_marked	not_marked	absence
PEAK000070	chr2L:10483186-10483369	core-promoter	exon;intergenic	iDRRE	lower_peak	flat	concordant	not_marked	marked	not_marked	presence
PEAK000071	chr2L:10503546-10503997	first-intron	intron	flat	flat	flat	concordant	not_marked	marked	not_marked	presence
PEAK000072	chr2L:10506014-10506233	core-promoter	exon	discordant	discordant	discordant	concordant	not_marked	marked	marked	presence
PEAK000073	chr2L:10506295-10506928	core-promoter	exon	iDRRE	iDRRE	flat	concordant	not_marked	marked	marked	presence
PEAK000074	chr2L:10514912-10515065	distal	intron	discordant	discordant	no_peak	concordant	not_marked	not_marked	not_marked	absence
PEAK000075	chr2L:10515869-10516093	proximal	intron	iDRRE	flat	flat	concordant	marked	marked	marked	presence
PEAK000076	chr2L:10516236-10516801	proximal	exon;intron	iDRRE	flat	flat	concordant	marked	marked	marked	presence
PEAK000077	chr2L:10517197-10517365	core-promoter	exon;intergenic	discordant	flat	flat	concordant	marked	marked	marked	presence
PEAK000078	chr2L:10527044-10527153	proximal	intergenic	no_peak	discordant	higher_peak	concordant	not_marked	not_marked	not_marked	absence
PEAK000079	chr2L:10528937-10529275	first-intron	exon;intron	iDRRE	flat	flat	concordant	not_marked	not_marked	marked	presence
PEAK000080	chr2L:10544794-10544965	core-promoter	exon;intergenic	flat	flat	flat	concordant	marked	marked	marked	presence
PEAK000081	chr2L:10612849-10613560	first-intron	intron	iDRRE	flat	iDRRE	concordant	marked	marked	marked	presence
PEAK000082	chr2L:10615565-10615962	first-intron	intron	flat	flat	flat	concordant	marked	marked	marked	presence
PEAK000083	chr2L:1062285-1062925	first-intron	intron	flat	flat	flat	concordant	marked	marked	marked	presence
PEAK000084	chr2L:1063142-1063440	first-intron	intron	flat	flat	flat	concordant	not_marked	marked	marked	presence
PEAK000085	chr2L:10632554-10632840	first-intron	intron	discordant	flat	flat	concordant	marked	not_marked	not_marked	presence
PEAK000086	chr2L:10632980-10633335	first-intron	intron	iDRRE	flat	flat	concordant	not_marked	not_marked	not_marked	absence
PEAK000087	chr2L:1063636-1064166	first-intron	intron	flat	iDRRE	flat	concordant	not_marked	marked	marked	presence
PEAK000088	chr2L:1065255-1065891	first-intron	intron	flat	flat	flat	concordant	not_marked	marked	higher_signal	presence
PEAK000089	chr2L:10654651-10654806	distal	intergenic	iDRRE	flat	flat	concordant	marked	not_marked	marked	presence
PEAK000090	chr2L:10661132-10661663	proximal	intergenic	iDRRE	flat	flat	concordant	not_marked	not_marked	marked	presence
PEAK000091	chr2L:10661949-10662252	core-promoter	exon;intergenic	flat	flat	flat	concordant	marked	marked	marked	presence
PEAK000092	chr2L:1066229-1066586	first-intron	intron	flat	flat	flat	concordant	marked	marked	not_marked	presence
PEAK000093	chr2L:10665811-10665982	first-intron	intron	flat	discordant	discordant	concordant	not_marked	not_marked	not_marked	absence
PEAK000094	chr2L:10676914-10677472	core-promoter	exon;intron;intergenic	flat	flat	flat	concordant	marked	marked	marked	presence
PEAK000095	chr2L:10677697-10678011	first-intron	exon;intron	iDRRE	flat	flat	concordant	marked	marked	marked	presence
PEAK000096	chr2L:10684599-10684768	proximal	intergenic	iDRRE	iDRRE	iDRRE	concordant	marked	marked	marked	presence
PEAK000097	chr2L:10687136-10687355	core-promoter	intergenic	iDRRE	flat	flat	concordant	marked	marked	marked	presence
PEAK000098	chr2L:10689006-10689422	core-promoter	exon;intergenic	iDRRE	flat	flat	concordant	marked	marked	marked	presence
PEAK000099	chr2L:10711284-10711519	proximal	intergenic	flat	flat	flat	concordant	not_marked	not_marked	not_marked	absence
PEAK000100	chr2L:1071044-1071904	first-intron	intron	iDRRE	flat	flat	concordant	not_marked	not_marked	not_marked	absence
PEAK000101	chr2L:10725306-10725525	proximal	exon;intron	iDRRE	flat	flat	concordant	not_marked	not_marked	marked	presence
PEAK000102	chr2L:10728887-10729020	core-promoter	exon;intergenic	iDRRE	lower_peak	iDRRE	concordant	not_marked	not_marked	not_marked	absence
PEAK000103	chr2L:10736018-10736178	core-promoter	exon;intergenic	flat	discordant	flat	concordant	marked	marked	marked	presence
PEAK000104	chr2L:10737247-10737438	core-promoter	exon;intergenic	iDRRE	flat	flat	concordant	not_marked	marked	marked	presence
PEAK000105	chr2L:10743854-10744031	core-promoter	exon;intergenic	iDRRE	discordant	discordant	concordant	not_marked	marked	marked	presence
PEAK000106	chr2L:10756150-10756508	core-promoter	exon;intergenic	iDRRE	flat	flat	concordant	not_marked	marked	marked	presence
PEAK000107	chr2L:10757062-10757442	proximal	intergenic	iDRRE	flat	flat	concordant	not_marked	not_marked	marked	presence
PEAK000108	chr2L:10767892-10768072	core-promoter	exon;intergenic	iDRRE	flat	flat	concordant	marked	marked	marked	presence
PEAK000109	chr2L:10769917-10770066	core-promoter	exon;intergenic	iDRRE	flat	flat	concordant	marked	marked	marked	presence
PEAK000110	chr2L:1077028-1077285	proximal	exon	iDRRE	flat	flat	concordant	not_marked	marked	marked	presence
PEAK000111	chr2L:10774161-10774376	distal	exon	iDRRE	flat	flat	concordant	marked	marked	marked	presence
PEAK000112	chr2L:1077416-1077602	proximal	exon	flat	flat	flat	concordant	marked	marked	marked	presence
PEAK000113	chr2L:1077686-1077973	core-promoter	exon;intergenic	flat	flat	flat	concordant	marked	marked	marked	presence
PEAK000114	chr2L:107820-108239	proximal	exon	iDRRE	flat	flat	concordant	not_marked	marked	marked	presence
PEAK000115	chr2L:10791157-10791391	first-intron	exon	discordant	flat	flat	concordant	marked	marked	not_marked	presence
PEAK000116	chr2L:10791575-10792085	first-intron	intron	iDRRE	flat	flat	concordant	marked	marked	not_marked	presence
PEAK000117	chr2L:10794082-10794554	first-intron	intron	flat	flat	flat	concordant	not_marked	marked	not_marked	presence
PEAK000118	chr2L:10800969-10801343	core-promoter	exon;intergenic	iDRRE	iDRRE	flat	concordant	marked	marked	marked	presence
PEAK000119	chr2L:10801609-10801818	proximal	exon	flat	flat	flat	concordant	marked	marked	marked	presence
PEAK000120	chr2L:10801923-10802569	first-intron	exon;intron	iDRRE	flat	flat	concordant	not_marked	marked	marked	presence
PEAK000121	chr2L:1080852-1081002	core-promoter	intergenic;exon	iDRRE	flat	iDRRE	concordant	marked	marked	not_marked	presence
PEAK000122	chr2L:10842277-10842404	first-intron	exon;intron	discordant	discordant	discordant	concordant	marked	marked	marked	presence
PEAK000123	chr2L:10842544-10842724	core-promoter	exon;intergenic	iDRRE	flat	flat	concordant	marked	marked	marked	presence
PEAK000124	chr2L:10850271-10850489	first-intron	exon	iDRRE	flat	iDRRE	concordant	not_marked	marked	marked	presence
PEAK000125	chr2L:10850762-10850956	core-promoter	exon;intron	iDRRE	lower_peak	flat	concordant	marked	marked	marked	presence
PEAK000126	chr2L:10858443-10858555	core-promoter	exon;intergenic	iDRRE	lower_peak	iDRRE	concordant	not_marked	marked	marked	presence
PEAK000127	chr2L:108593-109410	proximal	exon;intron	flat	iDRRE	flat	concordant	not_marked	marked	marked	presence
PEAK000128	chr2L:10967265-10967503	distal	intron	flat	discordant	iDRRE	concordant	not_marked	marked	marked	presence
PEAK000129	chr2L:10967600-10967947	distal	exon;intron	iDRRE	iDRRE	flat	concordant	not_marked	marked	marked	presence
PEAK000130	chr2L:10976343-10976489	core-promoter	exon;intergenic	discordant	flat	iDRRE	concordant	not_marked	marked	marked	presence
PEAK000131	chr2L:10976706-10976870	core-promoter	exon;intergenic	iDRRE	flat	flat	concordant	not_marked	marked	marked	presence
PEAK000132	chr2L:10977008-10977395	first-intron	exon;intron	flat	iDRRE	flat	concordant	not_marked	marked	marked	presence
PEAK000133	chr2L:10989291-10989483	core-promoter	exon;intergenic	iDRRE	iDRRE	flat	concordant	not_marked	marked	marked	presence
PEAK000134	chr2L:11004115-11004270	core-promoter	exon;intergenic	flat	iDRRE	flat	concordant	marked	marked	marked	presence
PEAK000135	chr2L:11004732-11005079	core-promoter	exon;intron;intergenic	flat	flat	flat	concordant	marked	marked	marked	presence
PEAK000136	chr2L:11014175-11014749	proximal	exon;intron	iDRRE	iDRRE	flat	concordant	marked	marked	not_marked	presence
PEAK000137	chr2L:11020676-11021722	distal	intron	flat	iDRRE	flat	concordant	marked	marked	marked	presence
PEAK000138	chr2L:11023206-11024104	distal	intron	flat	flat	flat	concordant	marked	marked	marked	presence
PEAK000139	chr2L:11024232-11024612	distal	intron	iDRRE	flat	flat	concordant	marked	marked	marked	presence
PEAK000140	chr2L:11032480-11032819	proximal	intron	flat	iDRRE	flat	concordant	not_marked	marked	marked	presence
PEAK000141	chr2L:11038060-11038355	distal	intron	discordant	discordant	flat	concordant	not_marked	marked	marked	presence
PEAK000142	chr2L:11039790-11039940	distal	intron	discordant	discordant	discordant	concordant	not_marked	not_marked	not_marked	absence
PEAK000143	chr2L:11042653-11043121	distal	intron	flat	iDRRE	flat	concordant	not_marked	marked	marked	presence
PEAK000144	chr2L:11046618-11046933	distal	intron	discordant	iDRRE	flat	concordant	not_marked	marked	not_marked	presence
PEAK000145	chr2L:11049653-11050304	distal	intron	iDRRE	iDRRE	flat	concordant	not_marked	marked	not_marked	presence
PEAK000146	chr2L:11051961-11052525	distal	intron	flat	flat	flat	concordant	marked	marked	marked	presence
PEAK000147	chr2L:11052735-11053160	distal	intron	flat	flat	flat	concordant	marked	marked	marked	presence
PEAK000148	chr2L:11053262-11053681	distal	intron	flat	flat	flat	concordant	not_marked	marked	marked	presence
PEAK000149	chr2L:11057391-11057538	first-intron	exon;intron	flat	discordant	flat	concordant	not_marked	not_marked	marked	presence
PEAK000150	chr2L:11057760-11057900	first-intron	intron	iDRRE	iDRRE	flat	concordant	not_marked	not_marked	marked	presence
PEAK000151	chr2L:11059097-11059280	first-intron	intron	flat	iDRRE	flat	concordant	not_marked	marked	not_marked	presence
PEAK000152	chr2L:11059409-11059600	first-intron	intron	flat	flat	flat	concordant	not_marked	not_marked	not_marked	absence
PEAK000153	chr2L:11060168-11060754	first-intron	intron	flat	iDRRE	flat	concordant	marked	marked	marked	presence
PEAK000154	chr2L:11061059-11061570	first-intron	intron	flat	iDRRE	flat	concordant	marked	marked	marked	presence
PEAK000155	chr2L:11061874-11062257	first-intron	intron	flat	flat	flat	concordant	marked	marked	marked	presence
PEAK000156	chr2L:11066958-11067185	core-promoter	exon;intergenic	iDRRE	flat	flat	concordant	not_marked	not_marked	marked	presence
PEAK000157	chr2L:11067855-11068000	proximal	intergenic	discordant	no_peak	discordant	concordant	not_marked	not_marked	not_marked	absence
PEAK000158	chr2L:11068263-11068515	proximal	intergenic	discordant	discordant	discordant	concordant	marked	marked	not_marked	presence
PEAK000159	chr2L:11069053-11069538	proximal	intergenic	flat	flat	flat	concordant	marked	marked	marked	presence
PEAK000160	chr2L:11069914-11070251	proximal	intergenic	flat	iDRRE	flat	concordant	marked	marked	marked	presence
PEAK000161	chr2L:11071774-11072377	proximal	intergenic	flat	flat	flat	concordant	not_marked	marked	not_marked	presence
PEAK000162	chr2L:11072774-11072944	proximal	intergenic	flat	iDRRE	flat	concordant	not_marked	not_marked	not_marked	absence
PEAK000163	chr2L:11074290-11074854	core-promoter	exon;intergenic	flat	iDRRE	flat	concordant	marked	marked	marked	presence
PEAK000164	chr2L:1108292-1108442	core-promoter	exon;intergenic	iDRRE	iDRRE	lower_peak	concordant	not_marked	marked	marked	presence
PEAK000165	chr2L:11100778-11100948	core-promoter	exon;intergenic	iDRRE	flat	flat	concordant	marked	marked	marked	presence
PEAK000166	chr2L:11106530-11106759	core-promoter	exon;intergenic	flat	flat	flat	concordant	marked	marked	marked	presence
PEAK000167	chr2L:11106877-11106978	core-promoter	exon;intergenic	iDRRE	discordant	lower_peak	concordant	marked	marked	marked	presence
PEAK000168	chr2L:11112998-11113165	core-promoter	exon;intergenic	flat	flat	higher_peak	concordant	marked	marked	marked	presence
PEAK000169	chr2L:11113383-11113631	proximal	intergenic	iDRRE	iDRRE	flat	concordant	marked	marked	marked	presence
PEAK000170	chr2L:11120252-11120409	core-promoter	exon;intergenic	discordant	discordant	discordant	concordant	marked	marked	marked	presence
PEAK000171	chr2L:11130622-11130811	core-promoter	exon;intergenic	iDRRE	flat	flat	concordant	marked	marked	marked	presence
PEAK000172	chr2L:11144136-11144278	proximal	exon;intron	discordant	iDRRE	discordant	concordant	not_marked	not_marked	not_marked	absence
PEAK000173	chr2L:11154920-11155113	proximal	exon;intron	flat	lower_peak	flat	concordant	not_marked	marked	marked	presence
PEAK000174	chr2L:11155431-11155957	core-promoter	exon;intron;intergenic	flat	flat	flat	concordant	not_marked	marked	marked	presence
PEAK000175	chr2L:11168778-11168998	distal	intron	iDRRE	flat	iDRRE	concordant	not_marked	not_marked	not_marked	absence
PEAK000176	chr2L:1117026-1118391	distal	exon;intron	flat	flat	flat	concordant	marked	marked	marked	presence
PEAK000177	chr2L:1117058-1118420	distal	exon;intron	flat	flat	flat	concordant	marked	marked	marked	presence
PEAK000178	chr2L:11175211-11175867	distal	exon;intron	flat	iDRRE	flat	concordant	not_marked	marked	marked	presence
PEAK000179	chr2L:11176138-11176675	distal	intron	iDRRE	flat	flat	concordant	not_marked	marked	marked	presence
PEAK000180	chr2L:11177033-11177221	proximal	intron	discordant	flat	flat	concordant	not_marked	marked	higher_signal	presence
PEAK000181	chr2L:11181427-11181554	distal	intron	discordant	discordant	discordant	concordant	marked	marked	marked	presence
PEAK000182	chr2L:11181622-11182148	distal	intron	flat	iDRRE	flat	concordant	marked	marked	marked	presence
PEAK000183	chr2L:11182548-11183288	distal	intron	flat	flat	flat	concordant	not_marked	marked	not_marked	presence
PEAK000184	chr2L:11184456-11184954	distal	intron	flat	flat	flat	concordant	marked	marked	marked	presence
PEAK000185	chr2L:11185163-11185367	distal	intron	iDRRE	flat	flat	concordant	marked	marked	marked	presence
PEAK000186	chr2L:11188617-11189249	distal	intron	flat	flat	flat	concordant	not_marked	not_marked	not_marked	absence
PEAK000187	chr2L:1118905-1119414	distal	exon;intron	flat	flat	lower_peak	concordant	marked	not_marked	marked	presence
PEAK000188	chr2L:11196791-11197184	distal	intron	iDRRE	flat	flat	concordant	marked	not_marked	higher_signal	presence
PEAK000189	chr2L:11206934-11207137	proximal	intergenic	iDRRE	flat	discordant	concordant	not_marked	not_marked	not_marked	absence
PEAK000190	chr2L:11210241-11210754	core-promoter	exon;intergenic	flat	flat	lower_peak	concordant	not_marked	marked	marked	presence
PEAK000191	chr2L:11219272-11219756	distal	intron	flat	flat	flat	concordant	marked	marked	marked	presence
PEAK000192	chr2L:11219948-11220092	distal	intron	flat	flat	iDRRE	concordant	marked	marked	marked	presence
PEAK000193	chr2L:11221045-11221626	distal	intron	iDRRE	flat	flat	concordant	not_marked	marked	marked	presence
PEAK000194	chr2L:11222026-11222195	distal	intron	discordant	iDRRE	flat	concordant	not_marked	not_marked	not_marked	absence
PEAK000195	chr2L:11268944-11269171	core-promoter	exon;intergenic	iDRRE	flat	flat	concordant	marked	marked	marked	presence
PEAK000196	chr2L:11271674-11272310	proximal	intron;exon	flat	iDRRE	flat	concordant	marked	marked	marked	presence
PEAK000197	chr2L:11277910-11278132	core-promoter	exon;intron;intergenic	flat	flat	flat	concordant	marked	marked	marked	presence
PEAK000198	chr2L:11280169-11280401	core-promoter	exon	iDRRE	discordant	lower_peak	concordant	not_marked	marked	not_marked	presence
PEAK000199	chr2L:11282028-11282147	core-promoter	exon;intergenic	iDRRE	discordant	flat	concordant	not_marked	marked	marked	presence
PEAK000200	chr2L:1128393-1128795	first-intron	intron	iDRRE	flat	flat	concordant	not_marked	marked	not_marked	presence
PEAK000201	chr2L:11291493-11292077	proximal	intergenic	iDRRE	iDRRE	flat	concordant	marked	marked	not_marked	presence
PEAK000202	chr2L:1129182-1129359	core-promoter	exon;intergenic	iDRRE	flat	flat	concordant	not_marked	marked	not_marked	presence
PEAK000203	chr2L:11305757-11306216	proximal	intergenic	flat	flat	flat	concordant	marked	marked	marked	presence
PEAK000204	chr2L:11306344-11306880	proximal	intergenic	flat	iDRRE	flat	concordant	marked	marked	marked	presence
PEAK000205	chr2L:11307754-11308197	core-promoter	exon;intergenic	flat	iDRRE	flat	concordant	not_marked	marked	not_marked	presence
PEAK000206	chr2L:11312341-11312535	distal	intergenic	discordant	discordant	discordant	concordant	not_marked	not_marked	not_marked	absence
PEAK000207	chr2L:11312781-11313467	distal	intergenic	flat	iDRRE	flat	concordant	not_marked	marked	higher_signal	presence
PEAK000208	chr2L:11317994-11318100	proximal	intergenic	iDRRE	discordant	flat	concordant	not_marked	marked	not_marked	presence
PEAK000209	chr2L:11320278-11320792	proximal	intergenic	iDRRE	iDRRE	flat	concordant	not_marked	marked	not_marked	presence
PEAK000210	chr2L:11323490-11323718	distal	intergenic	flat	discordant	flat	concordant	marked	marked	higher_signal	presence
PEAK000211	chr2L:11323812-11324020	distal	intergenic	iDRRE	flat	iDRRE	concordant	not_marked	marked	higher_signal	presence
PEAK000212	chr2L:11324204-11324392	distal	intergenic	flat	iDRRE	discordant	concordant	not_marked	marked	not_marked	presence
PEAK000213	chr2L:11326264-11326521	distal	intergenic	iDRRE	iDRRE	flat	concordant	not_marked	marked	not_marked	presence
PEAK000214	chr2L:11326689-11327205	distal	intergenic	iDRRE	iDRRE	flat	concordant	not_marked	marked	higher_signal	presence
PEAK000215	chr2L:11328643-11329052	distal	intergenic	flat	flat	flat	concordant	not_marked	marked	marked	presence
PEAK000216	chr2L:11343873-11344341	proximal	intergenic	flat	flat	flat	concordant	not_marked	not_marked	not_marked	absence
PEAK000217	chr2L:11345125-11345289	proximal	intergenic	discordant	discordant	discordant	concordant	not_marked	not_marked	not_marked	absence
PEAK000218	chr2L:11358365-11359199	core-promoter	exon;intergenic	iDRRE	flat	flat	concordant	marked	marked	marked	presence
PEAK000219	chr2L:11362723-11363272	first-intron	intron	iDRRE	iDRRE	flat	concordant	not_marked	not_marked	not_marked	absence
PEAK000220	chr2L:11373760-11373977	distal	intergenic	higher_peak	flat	discordant	concordant	not_marked	not_marked	not_marked	absence
PEAK000221	chr2L:11379075-11379821	distal	intergenic	flat	iDRRE	discordant	concordant	marked	marked	marked	presence
PEAK000222	chr2L:11382585-11383312	distal	intergenic	iDRRE	iDRRE	flat	concordant	marked	marked	not_marked	presence
PEAK000223	chr2L:11384231-11384858	distal	intergenic	iDRRE	iDRRE	flat	concordant	marked	marked	not_marked	presence
PEAK000224	chr2L:11385250-11385660	distal	intergenic	iDRRE	flat	flat	concordant	marked	marked	marked	presence
PEAK000225	chr2L:11386112-11386441	distal	intergenic	flat	iDRRE	lower_peak	concordant	marked	marked	marked	presence
PEAK000226	chr2L:11396301-11396555	distal	intergenic	discordant	discordant	higher_peak	concordant	not_marked	marked	not_marked	presence
PEAK000227	chr2L:11396863-11397126	distal	intergenic	iDRRE	iDRRE	flat	concordant	not_marked	marked	not_marked	presence
PEAK000228	chr2L:11398878-11399536	distal	intergenic	flat	flat	flat	concordant	marked	marked	marked	presence
PEAK000229	chr2L:11399816-11400151	distal	intergenic	iDRRE	flat	iDRRE	concordant	marked	marked	marked	presence
PEAK000230	chr2L:11401982-11402217	distal	intergenic	discordant	discordant	discordant	concordant	marked	marked	marked	presence
PEAK000231	chr2L:11405417-11405645	distal	intergenic	flat	flat	flat	concordant	not_marked	marked	marked	presence
PEAK000232	chr2L:11405797-11406141	distal	intergenic	flat	iDRRE	flat	concordant	not_marked	marked	marked	presence
PEAK000233	chr2L:11407044-11407776	distal	intergenic	flat	iDRRE	flat	concordant	marked	marked	marked	presence
PEAK000234	chr2L:11407991-11408572	distal	intergenic	flat	flat	flat	concordant	marked	marked	marked	presence
PEAK000235	chr2L:11418763-11419169	distal	intergenic	flat	lower_peak	flat	concordant	not_marked	not_marked	not_marked	absence
PEAK000236	chr2L:1142668-1143622	core-promoter	exon;intron;intergenic	iDRRE	iDRRE	flat	concordant	not_marked	marked	marked	presence
PEAK000237	chr2L:11428589-11428777	distal	intergenic	iDRRE	discordant	discordant	concordant	marked	not_marked	not_marked	presence
PEAK000238	chr2L:11431499-11431730	distal	intergenic	iDRRE	flat	flat	concordant	not_marked	not_marked	higher_signal	presence
PEAK000239	chr2L:11432416-11432595	distal	intergenic	flat	discordant	higher_peak	concordant	not_marked	not_marked	not_marked	absence
PEAK000240	chr2L:11433695-11434076	distal	intergenic	flat	flat	discordant	concordant	not_marked	not_marked	not_marked	absence
PEAK000241	chr2L:11445539-11446507	core-promoter	exon;intergenic	flat	iDRRE	flat	concordant	not_marked	marked	marked	presence
PEAK000242	chr2L:11447392-11448095	proximal	intergenic	iDRRE	flat	flat	concordant	not_marked	not_marked	not_marked	absence
PEAK000243	chr2L:11454248-11454901	distal	intergenic	flat	flat	flat	concordant	marked	marked	not_marked	presence
PEAK000244	chr2L:11455089-11455370	distal	intergenic	flat	flat	lower_peak	concordant	marked	marked	marked	presence
PEAK000245	chr2L:114562-114692	core-promoter	intergenic	iDRRE	flat	flat	concordant	not_marked	not_marked	not_marked	absence
PEAK000246	chr2L:11470232-11470410	distal	intergenic	flat	discordant	iDRRE	concordant	marked	marked	marked	presence
PEAK000247	chr2L:11474011-11474152	distal	intergenic	flat	flat	iDRRE	concordant	not_marked	not_marked	not_marked	absence
PEAK000248	chr2L:11475106-11475266	distal	intergenic	iDRRE	lower_peak	iDRRE	concordant	not_marked	not_marked	not_marked	absence
PEAK000249	chr2L:1147728-1147852	core-promoter	exon;intergenic	discordant	discordant	no_peak	concordant	not_marked	marked	not_marked	presence
PEAK000250	chr2L:11500579-11500877	proximal	intergenic	iDRRE	iDRRE	iDRRE	concordant	marked	not_marked	marked	presence
PEAK000251	chr2L:11501623-11501751	core-promoter	exon;intergenic	flat	discordant	discordant	concordant	marked	not_marked	marked	presence
PEAK000252	chr2L:11504800-11505361	first-intron	intron	flat	flat	flat	concordant	marked	marked	marked	presence
PEAK000253	chr2L:1150615-1150857	core-promoter	exon;intron;intergenic	flat	flat	flat	concordant	not_marked	marked	marked	presence
PEAK000254	chr2L:11516383-11516569	first-intron	exon;intron	flat	iDRRE	flat	concordant	not_marked	marked	marked	presence
PEAK000255	chr2L:11516711-11516930	proximal	exon	flat	flat	flat	concordant	not_marked	marked	marked	presence
PEAK000256	chr2L:11517013-11517371	core-promoter	exon;intergenic	iDRRE	flat	flat	concordant	not_marked	marked	marked	presence
PEAK000257	chr2L:11528158-11528285	core-promoter	exon;intergenic	higher_peak	flat	higher_peak	concordant	not_marked	not_marked	marked	presence
PEAK000258	chr2L:1157457-1157690	first-intron	intron	iDRRE	flat	flat	concordant	not_marked	marked	marked	presence
PEAK000259	chr2L:1157834-1158012	first-intron	intron	iDRRE	flat	flat	concordant	not_marked	marked	marked	presence
PEAK000260	chr2L:1158077-1158277	core-promoter	exon;intron;intergenic	iDRRE	iDRRE	flat	concordant	not_marked	marked	marked	presence
PEAK000261	chr2L:1158628-1158982	core-promoter	exon	flat	discordant	flat	concordant	marked	marked	marked	presence
PEAK000262	chr2L:11587609-11587888	first-intron	intron	iDRRE	flat	iDRRE	concordant	not_marked	marked	not_marked	presence
PEAK000263	chr2L:11607081-11607431	distal	intron	discordant	flat	discordant	concordant	not_marked	not_marked	not_marked	absence
PEAK000264	chr2L:1164366-1164473	core-promoter	exon;intergenic	discordant	discordant	discordant	concordant	not_marked	marked	not_marked	presence
PEAK000265	chr2L:11648684-11648900	core-promoter	exon;intergenic	discordant	discordant	discordant	concordant	not_marked	not_marked	not_marked	absence
PEAK000266	chr2L:1169804-1169933	proximal	exon	flat	flat	flat	concordant	marked	marked	marked	presence
PEAK000267	chr2L:1170114-1170222	core-promoter	exon;intron	iDRRE	flat	iDRRE	concordant	not_marked	marked	marked	presence
PEAK000268	chr2L:1172672-1172848	core-promoter	exon;intergenic	iDRRE	iDRRE	flat	concordant	not_marked	marked	marked	presence
PEAK000269	chr2L:1172986-1173089	core-promoter	exon;intergenic	iDRRE	flat	flat	concordant	marked	marked	marked	presence
PEAK000270	chr2L:11756009-11756434	proximal	intergenic	iDRRE	flat	flat	concordant	not_marked	not_marked	higher_signal	presence
PEAK000271	chr2L:1177580-1177800	core-promoter	exon;intergenic	flat	flat	flat	concordant	marked	marked	marked	presence
PEAK000272	chr2L:11804941-11805308	distal	intron	iDRRE	flat	flat	concordant	not_marked	marked	not_marked	presence
PEAK000273	chr2L:11806091-11806473	distal	exon;intron	iDRRE	iDRRE	discordant	concordant	higher_signal	marked	higher_signal	presence
PEAK000274	chr2L:11806588-11806834	distal	intron	flat	flat	flat	concordant	not_marked	marked	not_marked	presence
PEAK000275	chr2L:11806934-11807335	distal	intron	flat	iDRRE	flat	concordant	not_marked	marked	not_marked	presence
PEAK000276	chr2L:11807628-11807790	proximal	intron	discordant	discordant	flat	concordant	marked	marked	marked	presence
PEAK000277	chr2L:11807934-11808329	proximal	exon;intron	flat	flat	flat	concordant	marked	marked	marked	presence
PEAK000278	chr2L:11808748-11809019	first-intron	exon;intron	flat	iDRRE	flat	concordant	marked	marked	marked	presence
PEAK000279	chr2L:11809387-11809540	core-promoter	exon;intergenic	iDRRE	flat	flat	concordant	marked	marked	marked	presence
PEAK000280	chr2L:11821142-11821261	distal	exon	no_peak	flat	discordant	concordant	marked	not_marked	not_marked	presence
PEAK000281	chr2L:11829330-11829549	core-promoter	intron;exon	iDRRE	flat	flat	concordant	marked	marked	marked	presence
PEAK000282	chr2L:11838912-11839040	proximal	intron	discordant	lower_peak	discordant	concordant	marked	not_marked	not_marked	presence
PEAK000283	chr2L:1183917-1184125	core-promoter	exon;intergenic	flat	flat	flat	concordant	marked	marked	marked	presence
PEAK000284	chr2L:1185759-1186687	core-promoter	exon;intron	flat	flat	flat	concordant	marked	marked	marked	presence
PEAK000285	chr2L:11870677-11870982	distal	intron	lower_peak	lower_peak	flat	concordant	not_marked	not_marked	not_marked	absence
PEAK000286	chr2L:11871184-11871610	distal	intron	lower_peak	flat	flat	concordant	not_marked	not_marked	not_marked	absence
PEAK000287	chr2L:11878992-11879171	distal	intron	flat	flat	flat	concordant	not_marked	not_marked	not_marked	absence
PEAK000288	chr2L:11890253-11890444	distal	intron	flat	flat	iDRRE	concordant	not_marked	not_marked	not_marked	absence
PEAK000289	chr2L:11955994-11956140	distal	exon	discordant	flat	discordant	concordant	not_marked	not_marked	higher_signal	presence
PEAK000290	chr2L:11957510-11957630	distal	exon	discordant	no_peak	discordant	concordant	not_marked	not_marked	higher_signal	presence
PEAK000291	chr2L:11959552-11960171	distal	exon	flat	flat	flat	concordant	not_marked	marked	not_marked	presence
PEAK000292	chr2L:11965534-11966078	first-intron	intron	flat	flat	flat	concordant	marked	marked	marked	presence
PEAK000293	chr2L:11966451-11966797	first-intron	intron	flat	flat	lower_peak	concordant	marked	marked	marked	presence
PEAK000294	chr2L:11967228-11967383	first-intron	intron	discordant	discordant	no_peak	concordant	marked	marked	marked	presence
PEAK000295	chr2L:11968093-11968603	first-intron	intron	flat	flat	flat	concordant	marked	marked	marked	presence
PEAK000296	chr2L:11968907-11969208	first-intron	intron	flat	flat	flat	concordant	marked	marked	marked	presence
PEAK000297	chr2L:11970824-11971423	core-promoter	exon;intergenic	iDRRE	flat	flat	concordant	not_marked	marked	marked	presence
PEAK000298	chr2L:1198521-1198659	proximal	exon	flat	lower_peak	higher_peak	concordant	marked	not_marked	not_marked	presence
PEAK000299	chr2L:11989857-11989999	core-promoter	exon;intergenic	iDRRE	flat	flat	concordant	not_marked	marked	marked	presence
PEAK000300	chr2L:11990831-11990930	core-promoter	exon	discordant	flat	discordant	concordant	not_marked	marked	marked	presence
PEAK000301	chr2L:11996726-11996859	core-promoter	exon;intergenic	discordant	discordant	flat	concordant	not_marked	marked	not_marked	presence
PEAK000302	chr2L:12003031-12003398	proximal	intergenic	iDRRE	iDRRE	flat	concordant	marked	marked	marked	presence
PEAK000303	chr2L:12003565-12003715	proximal	intergenic	higher_peak	discordant	discordant	concordant	marked	marked	marked	presence
PEAK000304	chr2L:12004732-12005163	distal	intergenic	flat	iDRRE	lower_peak	concordant	marked	marked	higher_signal	presence
PEAK000305	chr2L:12005470-12006650	proximal	intergenic	iDRRE	flat	flat	concordant	marked	marked	higher_signal	presence
PEAK000306	chr2L:12006921-12007790	proximal	intergenic	flat	iDRRE	lower_peak	concordant	marked	not_marked	marked	presence
PEAK000307	chr2L:12010071-12010525	proximal	intergenic	iDRRE	iDRRE	flat	concordant	marked	marked	marked	presence
PEAK000308	chr2L:12010879-12011203	distal	intergenic	flat	discordant	flat	concordant	not_marked	marked	higher_signal	presence
PEAK000309	chr2L:12011405-12012650	proximal	intergenic	iDRRE	iDRRE	flat	concordant	marked	marked	marked	presence
PEAK000310	chr2L:12013314-12014246	core-promoter	exon;intergenic	iDRRE	iDRRE	flat	concordant	not_marked	marked	marked	presence
PEAK000311	chr2L:12025544-12025805	proximal	intergenic	flat	iDRRE	flat	concordant	not_marked	marked	not_marked	presence
PEAK000312	chr2L:12026167-12026711	proximal	intergenic	flat	flat	flat	concordant	not_marked	marked	marked	presence
PEAK000313	chr2L:12027156-12027615	core-promoter	exon;intergenic	iDRRE	flat	flat	concordant	not_marked	marked	marked	presence
PEAK000314	chr2L:12027735-12028049	first-intron	exon;intron	flat	iDRRE	flat	concordant	not_marked	marked	marked	presence
PEAK000315	chr2L:12038462-12038588	core-promoter	exon;intergenic	discordant	discordant	flat	concordant	marked	marked	marked	presence
PEAK000316	chr2L:12040647-12040802	core-promoter	exon;intergenic	discordant	flat	flat	concordant	marked	marked	not_marked	presence
PEAK000317	chr2L:12044705-12044882	proximal	exon	iDRRE	flat	lower_peak	concordant	not_marked	not_marked	not_marked	absence
PEAK000318	chr2L:12045048-12045344	core-promoter	exon;intergenic	flat	flat	flat	concordant	not_marked	marked	marked	presence
PEAK000319	chr2L:12045570-12046222	core-promoter	exon;intergenic	flat	flat	flat	concordant	not_marked	marked	marked	presence
PEAK000320	chr2L:12055557-12056123	core-promoter	exon;intron;intergenic	flat	iDRRE	lower_peak	concordant	not_marked	marked	marked	presence
PEAK000321	chr2L:120531-120798	first-intron	exon	discordant	iDRRE	flat	concordant	not_marked	higher_signal	not_marked	presence
PEAK000322	chr2L:12063135-12063281	core-promoter	exon;intergenic	iDRRE	flat	flat	concordant	not_marked	marked	not_marked	presence
PEAK000323	chr2L:12065607-12065767	proximal	exon	iDRRE	flat	flat	concordant	marked	marked	not_marked	presence
PEAK000324	chr2L:12065940-12066192	proximal	exon	iDRRE	flat	flat	concordant	marked	marked	marked	presence
PEAK000325	chr2L:12066685-12067170	core-promoter	exon;intergenic	flat	flat	flat	concordant	not_marked	not_marked	marked	presence
PEAK000326	chr2L:12085749-12086088	core-promoter	exon	flat	iDRRE	flat	concordant	marked	not_marked	marked	presence
PEAK000327	chr2L:12093676-12093853	first-intron	exon;intron	iDRRE	flat	flat	concordant	marked	marked	marked	presence
PEAK000328	chr2L:12096439-12096559	core-promoter	exon;intergenic	higher_peak	flat	flat	concordant	not_marked	marked	marked	presence
PEAK000329	chr2L:12103302-12103421	core-promoter	intergenic	iDRRE	flat	flat	concordant	marked	marked	not_marked	presence
PEAK000330	chr2L:12103642-12103801	core-promoter	exon;intergenic	flat	flat	flat	concordant	not_marked	marked	not_marked	presence
PEAK000331	chr2L:12104106-12104253	first-intron	intron	iDRRE	discordant	flat	concordant	marked	marked	not_marked	presence
PEAK000332	chr2L:12109055-12109188	core-promoter	intergenic;exon	discordant	discordant	iDRRE	concordant	marked	marked	marked	presence
PEAK000333	chr2L:12112671-12113109	proximal	intergenic	iDRRE	iDRRE	flat	concordant	marked	marked	marked	presence
PEAK000334	chr2L:12113210-12113617	proximal	intergenic	flat	iDRRE	flat	concordant	marked	marked	marked	presence
PEAK000335	chr2L:12114149-12114437	core-promoter	exon;intergenic	iDRRE	flat	flat	concordant	not_marked	marked	marked	presence
PEAK000336	chr2L:12117180-12117413	first-intron	intron	discordant	discordant	higher_peak	concordant	not_marked	marked	not_marked	presence
PEAK000337	chr2L:12119598-12120022	first-intron	intron	flat	flat	flat	concordant	not_marked	not_marked	not_marked	absence
PEAK000338	chr2L:12124828-12125193	distal	exon;intron	discordant	discordant	discordant	concordant	not_marked	marked	not_marked	presence
PEAK000339	chr2L:12133724-12133855	proximal	intergenic	flat	flat	flat	concordant	marked	marked	not_marked	presence
PEAK000340	chr2L:12134036-12134236	proximal	intergenic	iDRRE	flat	flat	concordant	not_marked	not_marked	not_marked	absence
PEAK000341	chr2L:12172896-12173011	core-promoter	exon;intergenic	flat	flat	flat	concordant	marked	marked	marked	presence
PEAK000342	chr2L:12177664-12177937	core-promoter	exon;intron	iDRRE	flat	iDRRE	concordant	not_marked	not_marked	higher_signal	presence
PEAK000343	chr2L:12193324-12193529	first-intron	intron	discordant	discordant	no_peak	concordant	marked	marked	marked	presence
PEAK000344	chr2L:1219981-1220193	proximal	exon;intron	discordant	lower_peak	flat	concordant	marked	marked	higher_signal	presence
PEAK000345	chr2L:12207691-12207881	core-promoter	exon;intron	iDRRE	iDRRE	flat	concordant	not_marked	not_marked	not_marked	absence
PEAK000346	chr2L:12315117-12315530	proximal	intergenic	discordant	flat	iDRRE	concordant	not_marked	not_marked	not_marked	absence
PEAK000347	chr2L:12364444-12364755	distal	intron	discordant	discordant	discordant	concordant	not_marked	not_marked	not_marked	absence
PEAK000348	chr2L:12365930-12366500	distal	exon;intron	flat	flat	flat	concordant	not_marked	not_marked	marked	presence
PEAK000349	chr2L:12367169-12367563	distal	intron	flat	flat	higher_peak	concordant	not_marked	not_marked	not_marked	absence
PEAK000350	chr2L:12404437-12404838	distal	exon;intron	flat	lower_peak	flat	concordant	not_marked	not_marked	not_marked	absence
PEAK000351	chr2L:12421821-12422051	first-intron	exon;intron	iDRRE	flat	flat	concordant	not_marked	not_marked	marked	presence
PEAK000352	chr2L:12423263-12423567	core-promoter	exon;intron;intergenic	flat	iDRRE	flat	concordant	not_marked	marked	marked	presence
PEAK000353	chr2L:12423668-12424338	proximal	intergenic	flat	flat	flat	concordant	not_marked	marked	marked	presence
PEAK000354	chr2L:12424715-12424861	core-promoter	intergenic	iDRRE	flat	iDRRE	concordant	not_marked	not_marked	not_marked	absence
PEAK000355	chr2L:12427644-12427746	core-promoter	exon;intergenic	discordant	flat	discordant	concordant	not_marked	marked	marked	presence
PEAK000356	chr2L:12433978-12434115	first-intron	exon;intron	iDRRE	flat	flat	concordant	not_marked	marked	marked	presence
PEAK000357	chr2L:12434400-12434581	core-promoter	exon;intron	iDRRE	flat	flat	concordant	not_marked	marked	marked	presence
PEAK000358	chr2L:12434636-12434939	core-promoter	exon	flat	flat	lower_peak	concordant	marked	marked	marked	presence
PEAK000359	chr2L:12435466-12435613	first-intron	intron	discordant	no_peak	discordant	concordant	marked	marked	marked	presence
PEAK000360	chr2L:12436328-12436777	first-intron	exon;intron	flat	flat	lower_peak	concordant	marked	marked	marked	presence
PEAK000361	chr2L:12455115-12455343	proximal	intergenic	discordant	flat	discordant	concordant	not_marked	not_marked	not_marked	absence
PEAK000362	chr2L:12455992-12456170	distal	exon	discordant	flat	discordant	concordant	not_marked	not_marked	not_marked	absence
PEAK000363	chr2L:12457252-12457944	distal	exon	iDRRE	iDRRE	flat	concordant	marked	marked	marked	presence
PEAK000364	chr2L:12459976-12460116	distal	intron	discordant	flat	flat	concordant	not_marked	marked	not_marked	presence
PEAK000365	chr2L:12461199-12461747	distal	exon;intron	iDRRE	iDRRE	flat	concordant	not_marked	marked	marked	presence
PEAK000366	chr2L:12466667-12466920	distal	intron	iDRRE	iDRRE	flat	concordant	not_marked	not_marked	not_marked	absence
PEAK000367	chr2L:12469067-12469569	distal	intron	flat	iDRRE	flat	concordant	not_marked	marked	not_marked	presence
PEAK000368	chr2L:12469867-12470090	distal	intron	discordant	discordant	discordant	concordant	not_marked	marked	not_marked	presence
PEAK000369	chr2L:12478687-12478899	distal	intron	discordant	higher_peak	no_peak	concordant	not_marked	marked	not_marked	presence
PEAK000370	chr2L:12480772-12481145	distal	intron	flat	iDRRE	flat	concordant	not_marked	marked	not_marked	presence
PEAK000371	chr2L:12482906-12483296	distal	exon	iDRRE	flat	flat	concordant	not_marked	marked	marked	presence
PEAK000372	chr2L:12483542-12483886	distal	exon;intron	flat	iDRRE	flat	concordant	not_marked	marked	marked	presence
PEAK000373	chr2L:12484226-12484569	distal	intron	flat	flat	flat	concordant	not_marked	marked	marked	presence
PEAK000374	chr2L:12504823-12504960	distal	exon;intron	discordant	discordant	discordant	concordant	not_marked	not_marked	not_marked	absence
PEAK000375	chr2L:12505094-12505263	distal	intron	discordant	discordant	flat	concordant	not_marked	not_marked	not_marked	absence
PEAK000376	chr2L:12507577-12508258	core-promoter	exon;intron	flat	flat	flat	concordant	not_marked	marked	marked	presence
PEAK000377	chr2L:12513517-12513933	distal	intron	flat	iDRRE	flat	concordant	not_marked	not_marked	not_marked	absence
PEAK000378	chr2L:12514059-12514474	distal	intron	flat	iDRRE	lower_peak	concordant	not_marked	not_marked	not_marked	absence
PEAK000379	chr2L:12515276-12515723	distal	intron	flat	flat	flat	concordant	not_marked	marked	higher_signal	presence
PEAK000380	chr2L:12520339-12520657	distal	intron	iDRRE	flat	lower_peak	concordant	not_marked	not_marked	not_marked	absence
PEAK000381	chr2L:12521035-12521318	distal	intron	flat	flat	lower_peak	concordant	not_marked	not_marked	not_marked	absence
PEAK000382	chr2L:12524100-12524397	distal	intron	iDRRE	flat	flat	concordant	not_marked	not_marked	not_marked	absence
PEAK000383	chr2L:12527683-12527857	distal	intron	flat	flat	flat	concordant	not_marked	not_marked	higher_signal	presence
PEAK000384	chr2L:12529521-12530033	distal	intron	iDRRE	flat	flat	concordant	not_marked	not_marked	not_marked	absence
PEAK000385	chr2L:12540327-12540566	distal	exon	discordant	discordant	flat	concordant	not_marked	not_marked	not_marked	absence
PEAK000386	chr2L:12542962-12543618	core-promoter	exon;intron	iDRRE	iDRRE	flat	concordant	marked	not_marked	marked	presence
PEAK000387	chr2L:12546274-12546434	proximal	exon	iDRRE	flat	flat	concordant	not_marked	marked	marked	presence
PEAK000388	chr2L:12546614-12546832	core-promoter	intergenic	iDRRE	flat	iDRRE	concordant	not_marked	marked	marked	presence
PEAK000389	chr2L:12563566-12563877	distal	intergenic	flat	flat	iDRRE	concordant	not_marked	not_marked	not_marked	absence
PEAK000390	chr2L:12564549-12564688	distal	intergenic	iDRRE	flat	flat	concordant	not_marked	not_marked	not_marked	absence
PEAK000391	chr2L:12576178-12576385	distal	intergenic	higher_peak	flat	discordant	concordant	not_marked	not_marked	not_marked	absence
PEAK000392	chr2L:12577780-12578120	distal	intergenic	discordant	flat	flat	concordant	not_marked	marked	not_marked	presence
PEAK000393	chr2L:12578190-12578454	distal	intergenic	iDRRE	flat	flat	concordant	not_marked	marked	higher_signal	presence
PEAK000394	chr2L:12578603-12579042	distal	intergenic	iDRRE	flat	flat	concordant	not_marked	marked	not_marked	presence
PEAK000395	chr2L:12586092-12586331	proximal	intergenic	discordant	flat	discordant	concordant	marked	marked	not_marked	presence
PEAK000396	chr2L:12586804-12587810	core-promoter	exon;intergenic	iDRRE	iDRRE	flat	concordant	not_marked	marked	marked	presence
PEAK000397	chr2L:12593924-12594312	distal	exon	flat	flat	flat	concordant	marked	marked	marked	presence
PEAK000398	chr2L:12595183-12595441	distal	intron	flat	flat	flat	concordant	not_marked	marked	higher_signal	presence
PEAK000399	chr2L:12597568-12598058	distal	intron	iDRRE	iDRRE	flat	concordant	not_marked	marked	not_marked	presence
PEAK000400	chr2L:12598329-12598693	distal	intron	iDRRE	iDRRE	iDRRE	concordant	not_marked	marked	not_marked	presence
PEAK000401	chr2L:12601661-12602091	distal	intron	flat	iDRRE	flat	concordant	not_marked	marked	not_marked	presence
PEAK000402	chr2L:12602521-12602748	distal	intron	flat	iDRRE	flat	concordant	not_marked	marked	higher_signal	presence
PEAK000403	chr2L:12605814-12606224	distal	intron	iDRRE	flat	discordant	concordant	not_marked	not_marked	not_marked	absence
PEAK000404	chr2L:12609931-12610348	distal	intron	discordant	flat	iDRRE	concordant	marked	marked	marked	presence
PEAK000405	chr2L:12611650-12612113	distal	intron	flat	flat	flat	concordant	marked	marked	marked	presence
PEAK000406	chr2L:12617655-12618804	distal	exon;intron	iDRRE	iDRRE	flat	concordant	not_marked	marked	marked	presence
PEAK000407	chr2L:12623746-12623921	distal	intron	discordant	discordant	discordant	concordant	not_marked	marked	not_marked	presence
PEAK000408	chr2L:12634892-12635281	distal	intron	flat	iDRRE	flat	concordant	not_marked	marked	not_marked	presence
PEAK000409	chr2L:12635591-12636221	distal	intron	flat	iDRRE	flat	concordant	not_marked	marked	not_marked	presence
PEAK000410	chr2L:12640265-12640666	distal	intron	flat	iDRRE	lower_peak	concordant	not_marked	marked	not_marked	presence
PEAK000411	chr2L:12641047-12641345	first-intron	exon;intron	iDRRE	iDRRE	flat	concordant	not_marked	marked	not_marked	presence
PEAK000412	chr2L:12645773-12646202	first-intron	exon;intron	flat	iDRRE	flat	concordant	marked	marked	marked	presence
PEAK000413	chr2L:12646377-12647083	core-promoter	intergenic	flat	iDRRE	lower_peak	concordant	not_marked	marked	marked	presence
PEAK000414	chr2L:12649122-12649349	distal	intergenic	discordant	iDRRE	flat	concordant	marked	marked	not_marked	presence
PEAK000415	chr2L:12651068-12651375	distal	intergenic	flat	iDRRE	discordant	concordant	marked	marked	higher_signal	presence
PEAK000416	chr2L:12651601-12652020	distal	intergenic	flat	flat	flat	concordant	marked	marked	higher_signal	presence
PEAK000417	chr2L:12655652-12656131	proximal	intergenic	iDRRE	iDRRE	flat	concordant	marked	not_marked	marked	presence
PEAK000418	chr2L:12657532-12658226	first-intron	exon;intron	iDRRE	flat	flat	concordant	not_marked	marked	not_marked	presence
PEAK000419	chr2L:12660293-12660699	distal	exon	flat	flat	flat	concordant	marked	marked	not_marked	presence
PEAK000420	chr2L:12664286-12664588	distal	intron	discordant	flat	discordant	concordant	marked	marked	higher_signal	presence
PEAK000421	chr2L:12692881-12693040	core-promoter	exon;intergenic	iDRRE	flat	flat	concordant	marked	marked	marked	presence
PEAK000422	chr2L:12694886-12695075	core-promoter	exon;intergenic	iDRRE	flat	flat	concordant	marked	marked	not_marked	presence
PEAK000423	chr2L:12700156-12700753	core-promoter	exon;intergenic	iDRRE	flat	flat	concordant	marked	marked	marked	presence
PEAK000424	chr2L:12704352-12704506	core-promoter	exon;intergenic	flat	discordant	flat	concordant	not_marked	marked	marked	presence
PEAK000425	chr2L:12704652-12704968	core-promoter	exon;intergenic	flat	flat	flat	concordant	not_marked	marked	marked	presence
PEAK000426	chr2L:12712396-12712574	first-intron	exon;intron	iDRRE	flat	flat	concordant	marked	marked	marked	presence
PEAK000427	chr2L:12718696-12719117	core-promoter	exon;intron	iDRRE	flat	flat	concordant	not_marked	marked	marked	presence
PEAK000428	chr2L:12719232-12719448	first-intron	exon;intron	discordant	discordant	discordant	concordant	not_marked	marked	marked	presence
PEAK000429	chr2L:12720152-12720270	first-intron	intron	iDRRE	flat	flat	concordant	not_marked	marked	not_marked	presence
PEAK000430	chr2L:12721781-12721962	core-promoter	exon;intron	iDRRE	flat	flat	concordant	marked	marked	marked	presence
PEAK000431	chr2L:12722178-12722354	first-intron	exon;intron	iDRRE	flat	iDRRE	concordant	marked	marked	marked	presence
PEAK000432	chr2L:12748382-12748630	distal	intron	flat	iDRRE	iDRRE	concordant	not_marked	not_marked	higher_signal	presence
PEAK000433	chr2L:12822670-12823070	core-promoter	exon;intergenic	flat	flat	flat	concordant	marked	marked	marked	presence
PEAK000434	chr2L:12823914-12824784	proximal	intergenic	flat	flat	flat	concordant	not_marked	marked	not_marked	presence
PEAK000435	chr2L:12829026-12829231	distal	intergenic	flat	flat	flat	concordant	marked	marked	marked	presence
PEAK000436	chr2L:12829462-12830022	distal	intergenic	flat	iDRRE	flat	concordant	marked	marked	marked	presence
PEAK000437	chr2L:12836273-12836623	distal	intergenic	discordant	discordant	flat	concordant	marked	marked	not_marked	presence
PEAK000438	chr2L:12837001-12837283	distal	intergenic	flat	iDRRE	flat	concordant	not_marked	marked	not_marked	presence
PEAK000439	chr2L:12840711-12841272	core-promoter	exon;intergenic	iDRRE	flat	flat	concordant	not_marked	marked	marked	presence
PEAK000440	chr2L:12841488-12841969	core-promoter	exon;intron;intergenic	flat	flat	flat	concordant	marked	marked	marked	presence
PEAK000441	chr2L:12842214-12842773	proximal	intergenic	flat	flat	flat	concordant	marked	marked	marked	presence
PEAK000442	chr2L:128479-128932	first-intron	exon;intron	iDRRE	iDRRE	flat	concordant	marked	marked	marked	presence
PEAK000443	chr2L:12850559-12850862	distal	intergenic	flat	discordant	flat	concordant	not_marked	marked	not_marked	presence
PEAK000444	chr2L:12852700-12853323	distal	intergenic	flat	iDRRE	flat	concordant	not_marked	marked	marked	presence
PEAK000445	chr2L:12854508-12854864	distal	intergenic	iDRRE	flat	flat	concordant	not_marked	not_marked	higher_signal	presence
PEAK000446	chr2L:128998-129481	first-intron	exon;intron	flat	flat	flat	concordant	marked	marked	marked	presence
PEAK000447	chr2L:12974120-12974644	core-promoter	exon;intron;intergenic	iDRRE	flat	flat	concordant	not_marked	marked	marked	presence
PEAK000448	chr2L:12974803-12975158	proximal	intron	iDRRE	flat	flat	concordant	not_marked	marked	marked	presence
PEAK000449	chr2L:1299289-1299559	distal	intergenic	lower_peak	flat	flat	concordant	not_marked	not_marked	not_marked	absence
PEAK000450	chr2L:13000601-13000743	core-promoter	exon;intergenic	discordant	discordant	discordant	concordant	not_marked	marked	marked	presence
PEAK000451	chr2L:13004058-13004222	core-promoter	exon;intergenic	iDRRE	flat	iDRRE	concordant	not_marked	marked	marked	presence
PEAK000452	chr2L:13019058-13019244	proximal	exon	iDRRE	flat	iDRRE	concordant	not_marked	marked	marked	presence
PEAK000453	chr2L:13021272-13021400	core-promoter	exon;intergenic	iDRRE	flat	flat	concordant	marked	marked	marked	presence
PEAK000454	chr2L:13043963-13044540	distal	intron	flat	iDRRE	flat	concordant	marked	not_marked	marked	presence
PEAK000455	chr2L:13044909-13045115	distal	intron	flat	flat	discordant	concordant	not_marked	not_marked	marked	presence
PEAK000456	chr2L:13060009-13060658	core-promoter	exon;intergenic	flat	flat	flat	concordant	marked	not_marked	marked	presence
PEAK000457	chr2L:13062225-13062526	distal	intergenic	discordant	no_peak	no_peak	concordant	not_marked	marked	not_marked	presence
PEAK000458	chr2L:13069729-13070248	distal	intergenic	iDRRE	flat	flat	concordant	not_marked	not_marked	higher_signal	presence
PEAK000459	chr2L:13070792-13071364	distal	intergenic	flat	iDRRE	flat	concordant	not_marked	marked	not_marked	presence
PEAK000460	chr2L:13073715-13073898	distal	intergenic	discordant	discordant	discordant	concordant	not_marked	marked	not_marked	presence
PEAK000461	chr2L:13074792-13075059	distal	intergenic	flat	iDRRE	flat	concordant	not_marked	not_marked	not_marked	absence
PEAK000462	chr2L:13079494-13079766	distal	intergenic	discordant	discordant	flat	concordant	not_marked	marked	not_marked	presence
PEAK000463	chr2L:13086883-13087518	distal	intergenic	flat	iDRRE	flat	concordant	marked	marked	marked	presence
PEAK000464	chr2L:13092735-13093244	distal	intergenic	iDRRE	flat	iDRRE	concordant	not_marked	marked	not_marked	presence
PEAK000465	chr2L:13095711-13096227	proximal	intergenic	flat	flat	flat	concordant	not_marked	not_marked	not_marked	absence
PEAK000466	chr2L:13097126-13097599	proximal	exon;intergenic	flat	flat	flat	concordant	not_marked	not_marked	not_marked	absence
PEAK000467	chr2L:13102312-13102872	proximal	intergenic	flat	iDRRE	flat	concordant	not_marked	not_marked	not_marked	absence
PEAK000468	chr2L:13113669-13113825	distal	intergenic	flat	flat	flat	concordant	not_marked	not_marked	not_marked	absence
PEAK000469	chr2L:13115848-13116165	distal	intergenic	iDRRE	flat	flat	concordant	not_marked	not_marked	higher_signal	presence
PEAK000470	chr2L:13121727-13122093	distal	intergenic	flat	flat	iDRRE	concordant	not_marked	not_marked	not_marked	absence
PEAK000471	chr2L:13122503-13122901	distal	intergenic	flat	flat	iDRRE	concordant	not_marked	not_marked	not_marked	absence
PEAK000472	chr2L:13129685-13129984	proximal	intergenic	flat	flat	flat	concordant	marked	not_marked	not_marked	presence
PEAK000473	chr2L:13136929-13137442	distal	intergenic	flat	flat	flat	concordant	marked	marked	not_marked	presence
PEAK000474	chr2L:13137609-13138458	distal	intergenic	flat	flat	flat	concordant	marked	marked	not_marked	presence
PEAK000475	chr2L:13145405-13145554	proximal	intergenic	discordant	discordant	discordant	concordant	not_marked	marked	not_marked	presence
PEAK000476	chr2L:13146560-13146910	core-promoter	exon;intergenic	flat	flat	flat	concordant	not_marked	marked	marked	presence
PEAK000477	chr2L:13147639-13147905	proximal	intergenic	flat	flat	flat	concordant	not_marked	not_marked	not_marked	absence
PEAK000478	chr2L:13148478-13148910	proximal	intergenic	flat	flat	flat	concordant	not_marked	not_marked	not_marked	absence
PEAK000479	chr2L:13150851-13151033	distal	intergenic	discordant	discordant	discordant	concordant	not_marked	not_marked	not_marked	absence
PEAK000480	chr2L:13154443-13154872	distal	intergenic	iDRRE	flat	flat	concordant	marked	not_marked	marked	presence
PEAK000481	chr2L:13156134-13156454	distal	intergenic	flat	iDRRE	flat	concordant	not_marked	not_marked	not_marked	absence
PEAK000482	chr2L:13165005-13165191	first-intron	exon;intron	iDRRE	lower_peak	flat	concordant	marked	marked	marked	presence
PEAK000483	chr2L:13165403-13165607	core-promoter	exon;intron	iDRRE	flat	flat	concordant	not_marked	marked	marked	presence
PEAK000484	chr2L:13165780-13166079	core-promoter	exon	iDRRE	flat	lower_peak	concordant	marked	marked	marked	presence
PEAK000485	chr2L:13166082-13166248	core-promoter	exon	discordant	discordant	no_peak	concordant	marked	marked	marked	presence
PEAK000486	chr2L:13176733-13176912	core-promoter	exon;intergenic	iDRRE	flat	flat	concordant	not_marked	marked	marked	presence
PEAK000487	chr2L:13177077-13177207	core-promoter	exon;intergenic	iDRRE	iDRRE	flat	concordant	not_marked	marked	marked	presence
PEAK000488	chr2L:13182530-13182688	core-promoter	exon;intron	iDRRE	flat	flat	concordant	marked	marked	marked	presence
PEAK000489	chr2L:131859-132158	core-promoter	exon;intron	iDRRE	flat	flat	concordant	marked	not_marked	marked	presence
PEAK000490	chr2L:13191224-13191388	first-intron	intron	discordant	discordant	flat	concordant	not_marked	marked	not_marked	presence
PEAK000491	chr2L:13191506-13191747	first-intron	intron	discordant	flat	flat	concordant	not_marked	marked	marked	presence
PEAK000492	chr2L:13191911-13192049	core-promoter	exon;intergenic	discordant	flat	iDRRE	concordant	not_marked	marked	marked	presence
PEAK000493	chr2L:13203229-13203368	core-promoter	exon;intergenic	iDRRE	flat	iDRRE	concordant	marked	marked	marked	presence
PEAK000494	chr2L:13203660-13204065	core-promoter	exon;intergenic	iDRRE	flat	flat	concordant	not_marked	marked	marked	presence
PEAK000495	chr2L:13205057-13205656	first-intron	intron	flat	flat	flat	concordant	marked	marked	not_marked	presence
PEAK000496	chr2L:13211924-13212134	proximal	intergenic	discordant	flat	flat	concordant	marked	marked	marked	presence
PEAK000497	chr2L:13215673-13216240	proximal	intergenic	iDRRE	iDRRE	flat	concordant	not_marked	not_marked	marked	presence
PEAK000498	chr2L:13219628-13219733	proximal	exon	discordant	flat	discordant	concordant	marked	marked	not_marked	presence
PEAK000499	chr2L:13219876-13220029	core-promoter	exon;intergenic	iDRRE	flat	flat	concordant	marked	marked	not_marked	presence
PEAK000500	chr2L:13244379-13244571	proximal	exon	flat	lower_peak	flat	concordant	not_marked	not_marked	not_marked	absence
PEAK000501	chr2L:13247814-13248036	first-intron	intron	discordant	iDRRE	iDRRE	concordant	not_marked	not_marked	not_marked	absence
PEAK000502	chr2L:13251686-13252114	proximal	exon	flat	flat	flat	concordant	not_marked	marked	marked	presence
PEAK000503	chr2L:13266620-13267024	first-intron	exon;intron	iDRRE	flat	flat	concordant	not_marked	marked	marked	presence
PEAK000504	chr2L:13270011-13270197	distal	intron	flat	discordant	flat	concordant	not_marked	not_marked	not_marked	absence
PEAK000505	chr2L:13272312-13272993	distal	exon	discordant	iDRRE	flat	concordant	marked	marked	marked	presence
PEAK000506	chr2L:13286325-13286564	core-promoter	exon;intergenic	iDRRE	flat	flat	concordant	not_marked	marked	marked	presence
PEAK000507	chr2L:13290575-13291084	proximal	exon	iDRRE	iDRRE	flat	concordant	marked	marked	marked	presence
PEAK000508	chr2L:13292294-13292871	first-intron	intron	flat	flat	flat	concordant	not_marked	marked	not_marked	presence
PEAK000509	chr2L:13296183-13296406	distal	exon;intron	iDRRE	flat	iDRRE	concordant	not_marked	marked	not_marked	presence
PEAK000510	chr2L:13349371-13349731	proximal	intergenic	flat	lower_peak	discordant	concordant	not_marked	not_marked	not_marked	absence
PEAK000511	chr2L:13363024-13363294	proximal	intergenic	iDRRE	flat	flat	concordant	not_marked	not_marked	not_marked	absence
PEAK000512	chr2L:13366072-13366234	core-promoter	exon;intergenic	iDRRE	flat	flat	concordant	marked	marked	marked	presence
PEAK000513	chr2L:13369108-13369212	core-promoter	intergenic;exon	discordant	discordant	discordant	concordant	marked	marked	marked	presence
PEAK000514	chr2L:13370950-13371094	core-promoter	exon	discordant	discordant	flat	concordant	not_marked	marked	marked	presence
PEAK000515	chr2L:13373752-13373876	core-promoter	exon	discordant	flat	flat	concordant	marked	marked	marked	presence
PEAK000516	chr2L:13374066-13374283	core-promoter	exon	iDRRE	flat	flat	concordant	marked	marked	marked	presence
PEAK000517	chr2L:13378478-13378635	core-promoter	exon;intergenic	iDRRE	flat	flat	concordant	marked	marked	marked	presence
PEAK000518	chr2L:13378812-13378974	core-promoter	exon;intergenic	flat	flat	flat	concordant	marked	marked	marked	presence
PEAK000519	chr2L:13387242-13387387	core-promoter	exon;intergenic	iDRRE	flat	iDRRE	concordant	not_marked	marked	marked	presence
PEAK000520	chr2L:13395048-13395281	core-promoter	exon;intron;intergenic	iDRRE	flat	flat	concordant	marked	marked	marked	presence
PEAK000521	chr2L:13398885-13399063	core-promoter	exon	iDRRE	flat	flat	concordant	not_marked	marked	marked	presence
PEAK000522	chr2L:13445563-13445773	core-promoter	exon;intron	iDRRE	flat	flat	concordant	marked	marked	marked	presence
PEAK000523	chr2L:13459056-13459295	proximal	intron	iDRRE	flat	iDRRE	concordant	not_marked	not_marked	not_marked	absence
PEAK000524	chr2L:13506041-13506629	distal	exon	iDRRE	iDRRE	flat	concordant	marked	marked	not_marked	presence
PEAK000525	chr2L:13512778-13513675	distal	exon;intron	iDRRE	iDRRE	flat	concordant	marked	marked	marked	presence
PEAK000526	chr2L:13514183-13514581	distal	intron	flat	flat	flat	concordant	marked	marked	not_marked	presence
PEAK000527	chr2L:13517280-13517431	distal	intron	discordant	discordant	discordant	concordant	not_marked	marked	not_marked	presence
PEAK000528	chr2L:13519123-13519407	distal	intron	iDRRE	flat	iDRRE	concordant	not_marked	not_marked	not_marked	absence
PEAK000529	chr2L:13521502-13521919	distal	intron	flat	flat	flat	concordant	marked	marked	not_marked	presence
PEAK000530	chr2L:13527811-13528026	core-promoter	exon;intron	discordant	flat	flat	concordant	not_marked	not_marked	not_marked	absence
PEAK000531	chr2L:13546878-13547053	distal	exon;intron	flat	flat	flat	concordant	not_marked	marked	not_marked	presence
PEAK000532	chr2L:13547938-13548163	first-intron	intron	iDRRE	flat	flat	concordant	marked	marked	not_marked	presence
PEAK000533	chr2L:13548450-13548569	first-intron	intron	discordant	discordant	flat	concordant	marked	marked	marked	presence
PEAK000534	chr2L:13548733-13549431	core-promoter	exon;intron;intergenic	flat	flat	flat	concordant	marked	marked	marked	presence
PEAK000535	chr2L:13550026-13550280	core-promoter	exon;intergenic	iDRRE	flat	flat	concordant	not_marked	marked	marked	presence
PEAK000536	chr2L:13550414-13550570	first-intron	exon;intron	flat	discordant	flat	concordant	not_marked	marked	marked	presence
PEAK000537	chr2L:13550798-13550890	first-intron	intron	flat	discordant	flat	concordant	not_marked	marked	marked	presence
PEAK000538	chr2L:13552761-13553043	distal	intron	flat	flat	flat	concordant	not_marked	not_marked	not_marked	absence
PEAK000539	chr2L:13554732-13555056	distal	intron	flat	flat	flat	concordant	not_marked	not_marked	not_marked	absence
PEAK000540	chr2L:13568571-13568784	distal	intron	flat	flat	discordant	concordant	not_marked	not_marked	not_marked	absence
PEAK000541	chr2L:13569450-13569715	distal	intron	flat	flat	iDRRE	concordant	not_marked	not_marked	not_marked	absence
PEAK000542	chr2L:13569814-13569914	distal	intron	discordant	discordant	discordant	concordant	not_marked	not_marked	not_marked	absence
PEAK000543	chr2L:13570454-13570544	distal	intron	no_peak	no_peak	no_peak	concordant	not_marked	marked	higher_signal	presence
PEAK000544	chr2L:13570567-13571065	distal	intron	flat	flat	flat	concordant	not_marked	marked	higher_signal	presence
PEAK000545	chr2L:13571301-13571484	distal	intron	flat	flat	flat	concordant	not_marked	marked	not_marked	presence
PEAK000546	chr2L:13571703-13572166	distal	intron	iDRRE	flat	iDRRE	concordant	not_marked	not_marked	not_marked	absence
PEAK000547	chr2L:13597371-13597684	proximal	intron	discordant	discordant	discordant	concordant	not_marked	not_marked	not_marked	absence
PEAK000548	chr2L:13611728-13611972	distal	intron	discordant	discordant	discordant	concordant	not_marked	not_marked	not_marked	absence
PEAK000549	chr2L:1361637-1361836	core-promoter	exon;intron;intergenic	flat	flat	flat	concordant	not_marked	not_marked	marked	presence
PEAK000550	chr2L:13622209-13622438	distal	intron	flat	lower_peak	discordant	concordant	not_marked	not_marked	not_marked	absence
PEAK000551	chr2L:13622760-13623058	distal	intron	higher_peak	flat	iDRRE	concordant	not_marked	not_marked	not_marked	absence
PEAK000552	chr2L:1362340-1362536	proximal	intergenic	flat	flat	flat	concordant	not_marked	not_marked	not_marked	absence
PEAK000553	chr2L:13640570-13640678	proximal	intron	discordant	flat	flat	concordant	not_marked	marked	marked	presence
PEAK000554	chr2L:13642294-13642739	core-promoter	exon;intergenic	flat	flat	flat	concordant	not_marked	marked	marked	presence
PEAK000555	chr2L:13642884-13643048	core-promoter	exon;intron	flat	no_peak	discordant	concordant	not_marked	marked	marked	presence
PEAK000556	chr2L:13655655-13655758	distal	intergenic	discordant	discordant	no_peak	concordant	not_marked	not_marked	not_marked	absence
PEAK000557	chr2L:13664703-13664937	proximal	intergenic	iDRRE	discordant	flat	concordant	not_marked	marked	marked	presence
PEAK000558	chr2L:13665305-13665576	core-promoter	exon;intergenic	iDRRE	iDRRE	flat	concordant	not_marked	marked	marked	presence
PEAK000559	chr2L:13665783-13666312	first-intron	exon;intron	iDRRE	flat	flat	concordant	not_marked	marked	marked	presence
PEAK000560	chr2L:13666641-13666935	first-intron	intron	flat	flat	iDRRE	concordant	not_marked	marked	marked	presence
PEAK000561	chr2L:1368810-1369136	proximal	exon;intergenic	discordant	flat	discordant	concordant	marked	marked	marked	presence
PEAK000562	chr2L:13770981-13771155	first-intron	exon;intron	flat	flat	flat	concordant	marked	marked	marked	presence
PEAK000563	chr2L:13776325-13776499	proximal	intron	discordant	flat	discordant	concordant	not_marked	marked	not_marked	presence
PEAK000564	chr2L:13776876-13777764	core-promoter	exon;intron	flat	flat	flat	concordant	marked	marked	higher_signal	presence
PEAK000565	chr2L:13779963-13780258	core-promoter	exon;intergenic	iDRRE	flat	flat	concordant	not_marked	not_marked	marked	presence
PEAK000566	chr2L:13780535-13780731	core-promoter	exon;intergenic	iDRRE	flat	flat	concordant	marked	marked	marked	presence
PEAK000567	chr2L:13783431-13783539	first-intron	exon;intron	discordant	discordant	no_peak	concordant	marked	marked	marked	presence
PEAK000568	chr2L:13784014-13784132	core-promoter	exon;intron	discordant	discordant	discordant	concordant	not_marked	marked	not_marked	presence
PEAK000569	chr2L:13793444-13793590	core-promoter	exon;intergenic	iDRRE	flat	iDRRE	concordant	marked	marked	marked	presence
PEAK000570	chr2L:13803784-13804214	first-intron	exon;intron	iDRRE	flat	flat	concordant	marked	marked	marked	presence
PEAK000571	chr2L:13804571-13805071	first-intron	intron	iDRRE	iDRRE	flat	concordant	not_marked	marked	not_marked	presence
PEAK000572	chr2L:13806327-13806632	first-intron	intron	flat	iDRRE	flat	concordant	not_marked	not_marked	not_marked	absence
PEAK000573	chr2L:13811447-13811567	core-promoter	exon;intergenic	iDRRE	flat	discordant	concordant	not_marked	marked	not_marked	presence
PEAK000574	chr2L:13813715-13813899	core-promoter	exon;intergenic	iDRRE	flat	flat	concordant	marked	marked	marked	presence
PEAK000575	chr2L:13820166-13820562	proximal	intergenic	discordant	discordant	flat	concordant	not_marked	marked	not_marked	presence
PEAK000576	chr2L:138207-138427	first-intron	exon;intron	iDRRE	flat	flat	concordant	not_marked	marked	not_marked	presence
PEAK000577	chr2L:13827679-13827816	core-promoter	exon;intergenic	iDRRE	flat	discordant	concordant	marked	marked	marked	presence
PEAK000578	chr2L:13829712-13829902	core-promoter	exon;intergenic	flat	lower_peak	flat	concordant	marked	marked	marked	presence
PEAK000579	chr2L:13835289-13835384	proximal	intergenic	discordant	discordant	flat	concordant	not_marked	marked	marked	presence
PEAK000580	chr2L:13835531-13835646	core-promoter	exon;intergenic	discordant	discordant	discordant	concordant	marked	marked	marked	presence
PEAK000581	chr2L:13837182-13837916	first-intron	intron	iDRRE	iDRRE	flat	concordant	not_marked	marked	not_marked	presence
PEAK000582	chr2L:13839607-13839787	first-intron	exon	flat	discordant	discordant	concordant	not_marked	not_marked	not_marked	absence
PEAK000583	chr2L:138762-139067	first-intron	exon	discordant	iDRRE	flat	concordant	marked	marked	not_marked	presence
PEAK000584	chr2L:13878113-13878305	first-intron	intron	iDRRE	flat	flat	concordant	not_marked	not_marked	marked	presence
PEAK000585	chr2L:13878725-13879095	first-intron	exon;intron	flat	iDRRE	flat	concordant	marked	marked	marked	presence
PEAK000586	chr2L:13888011-13888404	distal	intron	flat	iDRRE	flat	concordant	not_marked	not_marked	not_marked	absence
PEAK000587	chr2L:13890107-13890817	distal	intron	flat	flat	flat	concordant	not_marked	marked	not_marked	presence
PEAK000588	chr2L:13904244-13904560	proximal	exon	flat	flat	flat	concordant	not_marked	marked	marked	presence
PEAK000589	chr2L:13904653-13904819	core-promoter	exon;intergenic	flat	iDRRE	iDRRE	concordant	not_marked	marked	marked	presence
PEAK000590	chr2L:13905560-13905754	core-promoter	exon;intron;intergenic	iDRRE	flat	flat	concordant	not_marked	not_marked	marked	presence
PEAK000591	chr2L:13924328-13924619	proximal	intron	discordant	flat	flat	concordant	marked	not_marked	not_marked	presence
PEAK000592	chr2L:13929642-13930015	proximal	intron	flat	flat	flat	concordant	not_marked	not_marked	not_marked	absence
PEAK000593	chr2L:13934600-13935022	core-promoter	exon;intron	flat	flat	flat	concordant	marked	not_marked	marked	presence
PEAK000594	chr2L:13939491-13939690	distal	intron	iDRRE	flat	flat	concordant	marked	not_marked	not_marked	presence
PEAK000595	chr2L:13940684-13940898	distal	intron	discordant	flat	discordant	concordant	not_marked	marked	higher_signal	presence
PEAK000596	chr2L:13941758-13942660	distal	intron	flat	flat	iDRRE	concordant	not_marked	marked	not_marked	presence
PEAK000597	chr2L:13955785-13956398	proximal	exon;intergenic	flat	flat	flat	concordant	not_marked	marked	not_marked	presence
PEAK000598	chr2L:1395875-1396053	distal	exon;intron	flat	iDRRE	flat	concordant	not_marked	not_marked	not_marked	absence
PEAK000599	chr2L:13960573-13960665	first-intron	intron	discordant	discordant	discordant	concordant	not_marked	not_marked	not_marked	absence
PEAK000600	chr2L:13975583-13975830	proximal	exon	flat	flat	flat	concordant	marked	marked	marked	presence
PEAK000601	chr2L:139798-139909	first-intron	exon	no_peak	discordant	no_peak	concordant	marked	marked	marked	presence
PEAK000602	chr2L:1399412-1399971	first-intron	intron	flat	flat	flat	concordant	not_marked	not_marked	not_marked	absence
PEAK000603	chr2L:14000867-14001408	core-promoter	exon;intron;intergenic	flat	flat	flat	concordant	not_marked	marked	marked	presence
PEAK000604	chr2L:14001961-14002093	proximal	intergenic	discordant	flat	discordant	concordant	not_marked	not_marked	not_marked	absence
PEAK000605	chr2L:140102-140484	first-intron	exon;intron	flat	flat	flat	concordant	marked	marked	marked	presence
PEAK000606	chr2L:14013637-14013786	first-intron	exon;intron	flat	discordant	discordant	concordant	not_marked	not_marked	marked	presence
PEAK000607	chr2L:14020685-14020954	proximal	intergenic	iDRRE	flat	flat	concordant	not_marked	marked	not_marked	presence
PEAK000608	chr2L:14021596-14022102	core-promoter	exon;intergenic	iDRRE	flat	flat	concordant	not_marked	marked	not_marked	presence
PEAK000609	chr2L:14022427-14022628	proximal	intergenic	iDRRE	flat	flat	concordant	not_marked	marked	not_marked	presence
PEAK000610	chr2L:14023693-14024609	core-promoter	exon;intergenic	iDRRE	flat	flat	concordant	marked	marked	not_marked	presence
PEAK000611	chr2L:1404949-1405262	first-intron	intron	discordant	flat	flat	concordant	not_marked	not_marked	marked	presence
PEAK000612	chr2L:1405359-1405629	first-intron	intron	flat	flat	flat	concordant	not_marked	not_marked	marked	presence
PEAK000613	chr2L:1405918-1406440	first-intron	intron	flat	flat	flat	concordant	not_marked	marked	marked	presence
PEAK000614	chr2L:1409167-1409768	first-intron	intron	flat	iDRRE	flat	concordant	marked	marked	marked	presence
PEAK000615	chr2L:14094697-14094948	distal	intergenic	flat	flat	flat	concordant	not_marked	higher_signal	not_marked	presence
PEAK000616	chr2L:14105999-14106205	proximal	exon	discordant	flat	discordant	concordant	marked	marked	marked	presence
PEAK000617	chr2L:1413077-1413517	first-intron	intron	flat	iDRRE	flat	concordant	not_marked	marked	marked	presence
PEAK000618	chr2L:1415457-1415968	first-intron	intron	flat	flat	flat	concordant	marked	marked	not_marked	presence
PEAK000619	chr2L:14160930-14161124	distal	intergenic	iDRRE	lower_peak	iDRRE	concordant	not_marked	not_marked	not_marked	absence
PEAK000620	chr2L:14170851-14170962	first-intron	intron	discordant	discordant	no_peak	concordant	not_marked	not_marked	not_marked	absence
PEAK000621	chr2L:14175674-14176033	first-intron	intron	flat	iDRRE	flat	concordant	marked	marked	marked	presence
PEAK000622	chr2L:14178668-14178975	first-intron	intron	iDRRE	iDRRE	discordant	concordant	not_marked	marked	not_marked	presence
PEAK000623	chr2L:14180613-14181016	core-promoter	exon;intergenic	flat	flat	flat	concordant	marked	not_marked	marked	presence
PEAK000624	chr2L:14183040-14183404	distal	intergenic	flat	iDRRE	flat	concordant	not_marked	marked	not_marked	presence
PEAK000625	chr2L:14197253-14197489	distal	exon;intron	flat	flat	flat	concordant	not_marked	not_marked	not_marked	absence
PEAK000626	chr2L:1420317-1420766	core-promoter	exon;intergenic	flat	flat	lower_peak	concordant	not_marked	marked	marked	presence
PEAK000627	chr2L:14207471-14208012	distal	intron	iDRRE	flat	flat	concordant	not_marked	not_marked	not_marked	absence
PEAK000628	chr2L:14225235-14225551	distal	intron	iDRRE	lower_peak	flat	concordant	not_marked	not_marked	not_marked	absence
PEAK000629	chr2L:14226229-14226745	distal	intron	flat	flat	flat	concordant	marked	marked	marked	presence
PEAK000630	chr2L:1422642-1422838	distal	intergenic	flat	flat	flat	concordant	not_marked	not_marked	not_marked	absence
PEAK000631	chr2L:14226872-14227141	distal	intron	discordant	flat	flat	concordant	marked	marked	marked	presence
PEAK000632	chr2L:14233429-14233683	first-intron	exon;intron	iDRRE	flat	flat	concordant	not_marked	marked	marked	presence
PEAK000633	chr2L:14233958-14234294	core-promoter	exon;intergenic	flat	flat	flat	concordant	not_marked	marked	marked	presence
PEAK000634	chr2L:14234572-14234850	core-promoter	exon;intergenic	iDRRE	flat	flat	concordant	not_marked	marked	marked	presence
PEAK000635	chr2L:1424703-1424969	distal	intergenic	flat	flat	flat	concordant	not_marked	marked	higher_signal	presence
PEAK000636	chr2L:1425146-1425243	distal	intergenic	discordant	discordant	discordant	concordant	not_marked	marked	higher_signal	presence
PEAK000637	chr2L:14252865-14253433	distal	intergenic	iDRRE	flat	flat	concordant	not_marked	not_marked	not_marked	absence
PEAK000638	chr2L:14257760-14258097	distal	intergenic	iDRRE	flat	flat	concordant	not_marked	not_marked	not_marked	absence
PEAK000639	chr2L:14260955-14261561	proximal	intergenic	iDRRE	iDRRE	flat	concordant	not_marked	not_marked	not_marked	absence
PEAK000640	chr2L:14262214-14262414	proximal	intergenic	discordant	discordant	flat	concordant	not_marked	not_marked	marked	presence
PEAK000641	chr2L:1426194-1426880	proximal	intergenic	flat	iDRRE	flat	concordant	not_marked	marked	not_marked	presence
PEAK000642	chr2L:14262938-14263136	core-promoter	exon;intergenic	flat	flat	flat	concordant	not_marked	not_marked	marked	presence
PEAK000643	chr2L:14270037-14270234	first-intron	intron	discordant	no_peak	discordant	concordant	not_marked	not_marked	higher_signal	presence
PEAK000644	chr2L:1427003-1427387	proximal	intergenic	flat	flat	flat	concordant	not_marked	marked	higher_signal	presence
PEAK000645	chr2L:14272438-14272650	first-intron	intron	flat	discordant	flat	concordant	not_marked	not_marked	not_marked	absence
PEAK000646	chr2L:14279383-14279810	distal	intron	iDRRE	flat	flat	concordant	not_marked	not_marked	not_marked	absence
PEAK000647	chr2L:14282920-14283423	distal	intron	iDRRE	flat	flat	concordant	not_marked	not_marked	not_marked	absence
PEAK000648	chr2L:14287982-14288136	distal	intron	iDRRE	flat	iDRRE	concordant	marked	not_marked	marked	presence
PEAK000649	chr2L:14290408-14290715	proximal	intron	flat	flat	discordant	concordant	marked	marked	marked	presence
PEAK000650	chr2L:14294101-14294622	proximal	exon	flat	flat	flat	concordant	not_marked	marked	not_marked	presence
PEAK000651	chr2L:14297393-14298158	proximal	intron	flat	flat	flat	concordant	marked	marked	marked	presence
PEAK000652	chr2L:14300814-14301097	distal	exon;intron	iDRRE	flat	flat	concordant	not_marked	marked	marked	presence
PEAK000653	chr2L:14302805-14303194	distal	intron	iDRRE	iDRRE	flat	concordant	marked	marked	marked	presence
PEAK000654	chr2L:1431298-1431929	distal	intergenic	discordant	flat	flat	concordant	not_marked	marked	marked	presence
PEAK000655	chr2L:143165-143412	core-promoter	exon;intron	iDRRE	flat	flat	concordant	marked	marked	marked	presence
PEAK000656	chr2L:1432391-1433005	distal	intergenic	flat	flat	flat	concordant	not_marked	marked	not_marked	presence
PEAK000657	chr2L:14334044-14334529	core-promoter	exon;intergenic	flat	flat	flat	concordant	not_marked	marked	marked	presence
PEAK000658	chr2L:14334997-14335157	first-intron	intron	iDRRE	iDRRE	flat	concordant	not_marked	marked	marked	presence
PEAK000659	chr2L:1433999-1434338	distal	intergenic	iDRRE	iDRRE	iDRRE	concordant	not_marked	marked	not_marked	presence
PEAK000660	chr2L:14350789-14351048	first-intron	intron	discordant	flat	flat	concordant	not_marked	not_marked	not_marked	absence
PEAK000661	chr2L:14351527-14351699	core-promoter	intergenic	flat	flat	discordant	concordant	not_marked	higher_signal	not_marked	presence
PEAK000662	chr2L:14355036-14355226	core-promoter	exon;intergenic	iDRRE	flat	flat	concordant	marked	marked	marked	presence
PEAK000663	chr2L:14355357-14355509	first-intron	exon	iDRRE	iDRRE	flat	concordant	not_marked	marked	marked	presence
PEAK000664	chr2L:14356820-14357089	core-promoter	exon;intron	iDRRE	no_peak	no_peak	concordant	not_marked	not_marked	not_marked	absence
PEAK000665	chr2L:14366225-14366772	distal	exon	iDRRE	iDRRE	flat	concordant	marked	marked	marked	presence
PEAK000666	chr2L:14367010-14367292	distal	intergenic	flat	iDRRE	flat	concordant	marked	marked	marked	presence
PEAK000667	chr2L:14369692-14370046	distal	intergenic	flat	iDRRE	flat	concordant	marked	marked	not_marked	presence
PEAK000668	chr2L:14370210-14370462	distal	intergenic	flat	flat	flat	concordant	marked	marked	not_marked	presence
PEAK000669	chr2L:14381780-14382473	proximal	intergenic	flat	iDRRE	lower_peak	concordant	not_marked	marked	not_marked	presence
PEAK000670	chr2L:14386270-14386627	distal	intergenic	flat	iDRRE	flat	concordant	not_marked	marked	marked	presence
PEAK000671	chr2L:14386807-14387341	distal	intergenic	flat	iDRRE	flat	concordant	not_marked	marked	marked	presence
PEAK000672	chr2L:14392397-14393319	first-intron	exon;intron	iDRRE	iDRRE	flat	concordant	marked	marked	marked	presence
PEAK000673	chr2L:14394415-14394583	first-intron	intron	discordant	iDRRE	flat	concordant	not_marked	higher_signal	not_marked	presence
PEAK000674	chr2L:14397135-14397416	first-intron	intron	higher_peak	discordant	flat	concordant	not_marked	not_marked	not_marked	absence
PEAK000675	chr2L:1439705-1440089	distal	intergenic	iDRRE	flat	flat	concordant	not_marked	marked	not_marked	presence
PEAK000676	chr2L:14409427-14409929	core-promoter	exon;intergenic	flat	flat	flat	concordant	not_marked	not_marked	marked	presence
PEAK000677	chr2L:14410315-14410620	proximal	intergenic	iDRRE	iDRRE	flat	concordant	not_marked	not_marked	marked	presence
PEAK000678	chr2L:14415555-14415782	proximal	intergenic	discordant	discordant	discordant	concordant	not_marked	not_marked	not_marked	absence
PEAK000679	chr2L:14417861-14418028	proximal	intergenic	discordant	flat	flat	concordant	not_marked	not_marked	higher_signal	presence
PEAK000680	chr2L:14418687-14418812	proximal	intergenic	discordant	discordant	no_peak	concordant	not_marked	marked	higher_signal	presence
PEAK000681	chr2L:14418911-14419332	proximal	intergenic	flat	iDRRE	lower_peak	concordant	not_marked	marked	higher_signal	presence
PEAK000682	chr2L:14421298-14421527	distal	intergenic	flat	iDRRE	flat	concordant	not_marked	marked	marked	presence
PEAK000683	chr2L:14422314-14422572	distal	intergenic	iDRRE	flat	flat	concordant	not_marked	not_marked	not_marked	absence
PEAK000684	chr2L:14425516-14426019	proximal	intergenic	flat	iDRRE	flat	concordant	marked	marked	marked	presence
PEAK000685	chr2L:14426326-14427232	proximal	intergenic	flat	flat	flat	concordant	marked	marked	marked	presence
PEAK000686	chr2L:14432294-14432617	proximal	intergenic	iDRRE	discordant	flat	concordant	not_marked	not_marked	not_marked	absence
PEAK000687	chr2L:14432751-14433174	proximal	intergenic	flat	discordant	flat	concordant	not_marked	not_marked	not_marked	absence
PEAK000688	chr2L:14436780-14437347	distal	intergenic	discordant	iDRRE	flat	concordant	not_marked	marked	higher_signal	presence
PEAK000689	chr2L:14437440-14437723	distal	intergenic	discordant	discordant	no_peak	concordant	not_marked	marked	not_marked	presence
PEAK000690	chr2L:1444545-1445574	proximal	intergenic	flat	flat	flat	concordant	marked	marked	marked	presence
PEAK000691	chr2L:14451630-14452413	proximal	intergenic	flat	iDRRE	flat	concordant	marked	marked	not_marked	presence
PEAK000692	chr2L:14460599-14461179	distal	intergenic	flat	iDRRE	flat	concordant	not_marked	marked	not_marked	presence
PEAK000693	chr2L:14461352-14461972	distal	intergenic	flat	flat	flat	concordant	not_marked	not_marked	not_marked	absence
PEAK000694	chr2L:14465092-14465238	distal	intergenic	flat	discordant	discordant	concordant	not_marked	not_marked	not_marked	absence
PEAK000695	chr2L:14469592-14469898	distal	intergenic	flat	iDRRE	flat	concordant	not_marked	marked	not_marked	presence
PEAK000696	chr2L:14471542-14471953	distal	intergenic	flat	flat	flat	concordant	not_marked	marked	not_marked	presence
PEAK000697	chr2L:14472192-14472518	distal	intergenic	discordant	discordant	discordant	concordant	not_marked	marked	not_marked	presence
PEAK000698	chr2L:14472647-14472935	distal	intergenic	flat	flat	discordant	concordant	not_marked	marked	not_marked	presence
PEAK000699	chr2L:14475291-14475469	distal	intergenic	discordant	iDRRE	flat	concordant	not_marked	marked	not_marked	presence
PEAK000700	chr2L:14477694-14478076	distal	intergenic	flat	iDRRE	flat	concordant	not_marked	marked	not_marked	presence
PEAK000701	chr2L:14479791-14480181	distal	intergenic	flat	flat	flat	concordant	not_marked	not_marked	not_marked	absence
PEAK000702	chr2L:14482882-14483651	distal	intergenic	flat	iDRRE	flat	concordant	not_marked	marked	not_marked	presence
PEAK000703	chr2L:14484871-14485365	proximal	intergenic	discordant	flat	discordant	concordant	not_marked	not_marked	not_marked	absence
PEAK000704	chr2L:14490165-14490975	core-promoter	exon;intergenic	iDRRE	iDRRE	flat	concordant	marked	marked	marked	presence
PEAK000705	chr2L:14495783-14495919	core-promoter	exon;intergenic	discordant	discordant	discordant	concordant	not_marked	not_marked	not_marked	absence
PEAK000706	chr2L:14499291-14499913	proximal	intergenic	flat	flat	flat	concordant	not_marked	marked	marked	presence
PEAK000707	chr2L:14500201-14500327	distal	intergenic	discordant	discordant	no_peak	concordant	not_marked	marked	not_marked	presence
PEAK000708	chr2L:1450019-1450472	distal	intergenic	flat	iDRRE	flat	concordant	not_marked	marked	not_marked	presence
PEAK000709	chr2L:14502489-14502610	distal	intergenic	no_peak	no_peak	no_peak	concordant	marked	marked	marked	presence
PEAK000710	chr2L:14502798-14503378	distal	intergenic	iDRRE	iDRRE	flat	concordant	marked	marked	marked	presence
PEAK000711	chr2L:14506719-14507280	distal	intergenic	iDRRE	iDRRE	flat	concordant	not_marked	not_marked	not_marked	absence
PEAK000712	chr2L:14508778-14508989	distal	intergenic	iDRRE	iDRRE	flat	concordant	not_marked	marked	not_marked	presence
PEAK000713	chr2L:14510574-14510788	proximal	exon	discordant	iDRRE	flat	concordant	marked	marked	marked	presence
PEAK000714	chr2L:14511874-14512176	core-promoter	exon;intergenic	flat	iDRRE	flat	concordant	marked	marked	marked	presence
PEAK000715	chr2L:14512775-14512870	proximal	intergenic	no_peak	discordant	no_peak	concordant	not_marked	marked	not_marked	presence
PEAK000716	chr2L:14513137-14513595	proximal	intergenic	flat	iDRRE	flat	concordant	marked	marked	higher_signal	presence
PEAK000717	chr2L:14513970-14514579	proximal	intergenic	flat	flat	flat	concordant	marked	marked	not_marked	presence
PEAK000718	chr2L:14515280-14515517	distal	intergenic	discordant	discordant	flat	concordant	not_marked	marked	marked	presence
PEAK000719	chr2L:14515917-14516582	proximal	intergenic	flat	iDRRE	flat	concordant	not_marked	marked	marked	presence
PEAK000720	chr2L:14519059-14519301	proximal	intergenic	iDRRE	flat	flat	concordant	not_marked	marked	not_marked	presence
PEAK000721	chr2L:14519746-14520013	proximal	intergenic	flat	discordant	flat	concordant	not_marked	marked	not_marked	presence
PEAK000722	chr2L:14527487-14527746	distal	intergenic	flat	flat	flat	concordant	not_marked	not_marked	higher_signal	presence
PEAK000723	chr2L:14529018-14529338	proximal	intergenic	flat	flat	flat	concordant	not_marked	marked	not_marked	presence
PEAK000724	chr2L:14531175-14531991	proximal	intergenic	flat	flat	flat	concordant	marked	marked	marked	presence
PEAK000725	chr2L:14535605-14535955	distal	intergenic	flat	iDRRE	flat	concordant	not_marked	marked	not_marked	presence
PEAK000726	chr2L:14541797-14542243	distal	intergenic	discordant	discordant	flat	concordant	not_marked	marked	not_marked	presence
PEAK000727	chr2L:14542974-14543129	distal	intergenic	discordant	flat	flat	concordant	not_marked	not_marked	not_marked	absence
PEAK000728	chr2L:14545920-14546099	distal	intergenic	flat	discordant	discordant	concordant	not_marked	marked	not_marked	presence
PEAK000729	chr2L:14546221-14546347	distal	intergenic	no_peak	no_peak	discordant	concordant	not_marked	marked	not_marked	presence
PEAK000730	chr2L:14546749-14546987	distal	intergenic	iDRRE	flat	flat	concordant	marked	marked	not_marked	presence
PEAK000731	chr2L:14547176-14547463	proximal	intergenic	flat	iDRRE	flat	concordant	marked	marked	not_marked	presence
PEAK000732	chr2L:14550688-14550911	core-promoter	exon	discordant	flat	discordant	concordant	marked	marked	not_marked	presence
PEAK000733	chr2L:14551322-14551727	proximal	intergenic	discordant	iDRRE	flat	concordant	marked	marked	higher_signal	presence
PEAK000734	chr2L:14552441-14553204	proximal	intergenic	flat	iDRRE	flat	concordant	marked	marked	marked	presence
PEAK000735	chr2L:14553600-14553990	distal	intergenic	flat	iDRRE	flat	concordant	marked	marked	marked	presence
PEAK000736	chr2L:14554165-14554489	distal	intergenic	flat	iDRRE	iDRRE	concordant	not_marked	marked	higher_signal	presence
PEAK000737	chr2L:14557493-14557909	proximal	intergenic	flat	iDRRE	flat	concordant	not_marked	marked	marked	presence
PEAK000738	chr2L:14558024-14558327	proximal	exon	flat	iDRRE	flat	concordant	not_marked	marked	marked	presence
PEAK000739	chr2L:1455851-1456300	distal	intergenic	flat	flat	flat	concordant	marked	marked	marked	presence
PEAK000740	chr2L:14560504-14561127	core-promoter	exon;intergenic	iDRRE	flat	flat	concordant	not_marked	not_marked	not_marked	absence
PEAK000741	chr2L:1456537-1456890	distal	intergenic	flat	flat	flat	concordant	marked	marked	marked	presence
PEAK000742	chr2L:14568710-14569246	distal	intergenic	flat	flat	flat	concordant	marked	marked	marked	presence
PEAK000743	chr2L:14569594-14569974	distal	intergenic	flat	flat	flat	concordant	marked	marked	marked	presence
PEAK000744	chr2L:14571634-14572046	distal	intergenic	flat	iDRRE	flat	concordant	not_marked	marked	higher_signal	presence
PEAK000745	chr2L:14573478-14573854	distal	intergenic	flat	flat	flat	concordant	not_marked	marked	not_marked	presence
PEAK000746	chr2L:14577657-14578488	proximal	intergenic	flat	flat	flat	concordant	not_marked	marked	marked	presence
PEAK000747	chr2L:14579456-14579762	distal	intergenic	discordant	discordant	iDRRE	concordant	not_marked	marked	not_marked	presence
PEAK000748	chr2L:14580948-14581171	distal	intergenic	iDRRE	flat	flat	concordant	not_marked	not_marked	not_marked	absence
PEAK000749	chr2L:1458293-1458698	distal	intergenic	no_peak	discordant	discordant	concordant	marked	marked	higher_signal	presence
PEAK000750	chr2L:14586995-14587417	proximal	intergenic	flat	flat	flat	concordant	marked	marked	marked	presence
PEAK000751	chr2L:1458861-1459450	distal	intergenic	iDRRE	iDRRE	flat	concordant	marked	marked	higher_signal	presence
PEAK000752	chr2L:14588967-14589210	proximal	intergenic	iDRRE	lower_peak	iDRRE	concordant	not_marked	not_marked	not_marked	absence
PEAK000753	chr2L:14596222-14596740	distal	intergenic	flat	flat	flat	concordant	not_marked	marked	not_marked	presence
PEAK000754	chr2L:14598706-14598945	core-promoter	exon;intergenic	flat	flat	flat	concordant	not_marked	not_marked	not_marked	absence
PEAK000755	chr2L:14599355-14599758	core-promoter	exon	flat	flat	flat	concordant	not_marked	not_marked	not_marked	absence
PEAK000756	chr2L:14605675-14606618	distal	intron	flat	iDRRE	flat	concordant	not_marked	marked	marked	presence
PEAK000757	chr2L:14607003-14607222	distal	intron	discordant	flat	discordant	concordant	not_marked	marked	marked	presence
PEAK000758	chr2L:14607539-14608116	distal	intron	flat	flat	flat	concordant	marked	marked	marked	presence
PEAK000759	chr2L:1460844-1461118	distal	intergenic	flat	flat	flat	concordant	marked	marked	marked	presence
PEAK000760	chr2L:14621905-14622263	distal	intron	flat	flat	flat	concordant	marked	marked	marked	presence
PEAK000761	chr2L:14623786-14624027	distal	intron	flat	flat	iDRRE	concordant	not_marked	not_marked	not_marked	absence
PEAK000762	chr2L:14624848-14625378	distal	intron	flat	flat	flat	concordant	not_marked	not_marked	not_marked	absence
PEAK000763	chr2L:14627432-14628033	distal	intron	discordant	discordant	discordant	concordant	not_marked	marked	not_marked	presence
PEAK000764	chr2L:1463141-1463745	distal	intergenic	flat	iDRRE	flat	concordant	not_marked	not_marked	not_marked	absence
PEAK000765	chr2L:14634677-14635120	distal	intron	iDRRE	flat	iDRRE	concordant	marked	marked	not_marked	presence
PEAK000766	chr2L:14640367-14640496	first-intron	intron	discordant	discordant	no_peak	concordant	not_marked	not_marked	not_marked	absence
PEAK000767	chr2L:14642211-14642586	first-intron	intron	flat	flat	flat	concordant	not_marked	marked	marked	presence
PEAK000768	chr2L:14651818-14652426	first-intron	intron	flat	iDRRE	flat	concordant	marked	marked	marked	presence
PEAK000769	chr2L:14653334-14653569	first-intron	intron	discordant	discordant	discordant	concordant	not_marked	not_marked	not_marked	absence
PEAK000770	chr2L:14654185-14654456	first-intron	intron	discordant	discordant	discordant	concordant	not_marked	not_marked	not_marked	absence
PEAK000771	chr2L:14657917-14658621	first-intron	intron	flat	iDRRE	flat	concordant	not_marked	marked	not_marked	presence
PEAK000772	chr2L:14659403-14659522	first-intron	intron	no_peak	no_peak	no_peak	concordant	not_marked	marked	not_marked	presence
PEAK000773	chr2L:14662848-14663125	first-intron	intron	iDRRE	flat	iDRRE	concordant	not_marked	marked	not_marked	presence
PEAK000774	chr2L:14663177-14663693	first-intron	intron	flat	iDRRE	flat	concordant	not_marked	marked	not_marked	presence
PEAK000775	chr2L:14664578-14664860	first-intron	intron	flat	iDRRE	flat	concordant	not_marked	marked	not_marked	presence
PEAK000776	chr2L:14665696-14666048	first-intron	intron	flat	flat	flat	concordant	not_marked	marked	not_marked	presence
PEAK000777	chr2L:14666708-14667013	first-intron	intron	discordant	discordant	discordant	concordant	not_marked	not_marked	not_marked	absence
PEAK000778	chr2L:14671118-14671298	first-intron	intron	flat	flat	flat	concordant	not_marked	not_marked	not_marked	absence
PEAK000779	chr2L:14672459-14672689	first-intron	intron	flat	flat	flat	concordant	not_marked	not_marked	not_marked	absence
PEAK000780	chr2L:14674512-14674744	first-intron	intron	flat	flat	flat	concordant	not_marked	not_marked	not_marked	absence
PEAK000781	chr2L:14674977-14675234	first-intron	intron	flat	flat	flat	concordant	not_marked	not_marked	not_marked	absence
PEAK000782	chr2L:14679657-14680039	first-intron	intron	flat	flat	flat	concordant	not_marked	not_marked	not_marked	absence
PEAK000783	chr2L:14681144-14681616	first-intron	intron	flat	iDRRE	iDRRE	concordant	not_marked	marked	marked	presence
PEAK000784	chr2L:14682299-14682634	first-intron	intron	iDRRE	flat	discordant	concordant	not_marked	not_marked	not_marked	absence
PEAK000785	chr2L:14683569-14683794	first-intron	intron	flat	iDRRE	flat	concordant	not_marked	marked	not_marked	presence
PEAK000786	chr2L:1468365-1468781	distal	intergenic	flat	discordant	discordant	concordant	not_marked	not_marked	not_marked	absence
PEAK000787	chr2L:14688927-14689451	core-promoter	exon;intergenic	flat	iDRRE	flat	concordant	marked	marked	marked	presence
PEAK000788	chr2L:14689620-14689727	proximal	intergenic	iDRRE	flat	flat	concordant	not_marked	not_marked	marked	presence
PEAK000789	chr2L:14690257-14690403	proximal	intergenic	iDRRE	flat	flat	concordant	not_marked	not_marked	not_marked	absence
PEAK000790	chr2L:14691122-14691393	proximal	intergenic	flat	discordant	discordant	concordant	not_marked	not_marked	not_marked	absence
PEAK000791	chr2L:14695887-14696102	distal	intergenic	discordant	flat	iDRRE	concordant	not_marked	not_marked	not_marked	absence
PEAK000792	chr2L:14699688-14700109	distal	intergenic	flat	flat	flat	concordant	not_marked	not_marked	not_marked	absence
PEAK000793	chr2L:1470320-1470884	distal	intergenic	flat	flat	flat	concordant	marked	marked	marked	presence
PEAK000794	chr2L:14706272-14706465	distal	intergenic	iDRRE	lower_peak	iDRRE	concordant	higher_signal	not_marked	not_marked	presence
PEAK000795	chr2L:1470950-1471437	distal	intergenic	flat	flat	flat	concordant	marked	marked	marked	presence
PEAK000796	chr2L:14711693-14711988	proximal	intergenic	flat	flat	flat	concordant	not_marked	marked	not_marked	presence
PEAK000797	chr2L:14712430-14712703	core-promoter	exon;intron;intergenic	flat	flat	iDRRE	concordant	not_marked	marked	not_marked	presence
PEAK000798	chr2L:14713526-14713783	core-promoter	exon;intergenic	iDRRE	flat	iDRRE	concordant	not_marked	marked	not_marked	presence
PEAK000799	chr2L:1472246-1472593	distal	intergenic	discordant	iDRRE	flat	concordant	not_marked	marked	not_marked	presence
PEAK000800	chr2L:1473945-1474208	distal	intergenic	discordant	iDRRE	flat	concordant	not_marked	marked	higher_signal	presence
PEAK000801	chr2L:14760993-14761256	proximal	exon	discordant	flat	higher_peak	concordant	marked	marked	marked	presence
PEAK000802	chr2L:1476257-1476938	distal	intergenic	discordant	flat	flat	concordant	not_marked	marked	not_marked	presence
PEAK000803	chr2L:14851666-14851936	core-promoter	exon;intergenic	flat	flat	iDRRE	concordant	not_marked	not_marked	marked	presence
PEAK000804	chr2L:1485946-1486096	distal	intergenic	discordant	flat	flat	concordant	not_marked	marked	not_marked	presence
PEAK000805	chr2L:1486232-1486473	distal	intergenic	flat	flat	iDRRE	concordant	not_marked	marked	not_marked	presence
PEAK000806	chr2L:1486597-1486936	distal	intergenic	flat	iDRRE	flat	concordant	not_marked	marked	not_marked	presence
PEAK000807	chr2L:1491916-1492070	proximal	intergenic	iDRRE	flat	flat	concordant	not_marked	not_marked	not_marked	absence
PEAK000808	chr2L:1492264-1492541	core-promoter	exon;intergenic	flat	flat	flat	concordant	not_marked	not_marked	not_marked	absence
PEAK000809	chr2L:149733-150020	first-intron	intron	flat	discordant	flat	concordant	not_marked	not_marked	not_marked	absence
PEAK000810	chr2L:14983903-14984113	distal	exon;intron	flat	flat	discordant	concordant	not_marked	not_marked	not_marked	absence
PEAK000811	chr2L:14995505-14996015	first-intron	intron	iDRRE	flat	flat	concordant	not_marked	marked	not_marked	presence
PEAK000812	chr2L:14997431-14997670	core-promoter	exon;intergenic	iDRRE	iDRRE	flat	concordant	not_marked	not_marked	marked	presence
PEAK000813	chr2L:14999569-14999845	distal	intergenic	iDRRE	iDRRE	discordant	concordant	not_marked	not_marked	not_marked	absence
PEAK000814	chr2L:1502807-1503004	core-promoter	exon;intron	iDRRE	flat	iDRRE	concordant	not_marked	marked	marked	presence
PEAK000815	chr2L:15035293-15035762	core-promoter	exon;intergenic	iDRRE	flat	flat	concordant	not_marked	marked	marked	presence
PEAK000816	chr2L:15038778-15038953	core-promoter	exon;intergenic	flat	flat	flat	concordant	marked	marked	marked	presence
PEAK000817	chr2L:15039349-15039550	core-promoter	exon;intergenic	iDRRE	flat	flat	concordant	marked	marked	marked	presence
PEAK000818	chr2L:1504402-1504547	proximal	intergenic	flat	flat	iDRRE	concordant	not_marked	higher_signal	not_marked	presence
PEAK000819	chr2L:15053475-15053588	first-intron	exon;intron	discordant	discordant	discordant	concordant	not_marked	not_marked	not_marked	absence
PEAK000820	chr2L:15057004-15057323	first-intron	intron	flat	flat	flat	concordant	marked	marked	marked	presence
PEAK000821	chr2L:15057767-15058053	core-promoter	exon;intergenic	iDRRE	flat	flat	concordant	not_marked	marked	marked	presence
PEAK000822	chr2L:15060655-15060908	core-promoter	exon;intergenic	iDRRE	flat	flat	concordant	marked	marked	marked	presence
PEAK000823	chr2L:15067918-15068213	first-intron	exon;intron	flat	flat	flat	concordant	marked	marked	marked	presence
PEAK000824	chr2L:15074474-15074744	core-promoter	intergenic	discordant	flat	iDRRE	concordant	not_marked	higher_signal	marked	presence
PEAK000825	chr2L:15096906-15097004	distal	exon;intergenic	iDRRE	lower_peak	flat	concordant	not_marked	not_marked	not_marked	absence
PEAK000826	chr2L:15109193-15109483	core-promoter	exon;intergenic	flat	iDRRE	flat	concordant	marked	not_marked	marked	presence
PEAK000827	chr2L:15111245-15111653	first-intron	intron	flat	iDRRE	flat	concordant	not_marked	not_marked	not_marked	absence
PEAK000828	chr2L:15113284-15113551	core-promoter	exon;intergenic	iDRRE	flat	flat	concordant	marked	marked	marked	presence
PEAK000829	chr2L:15210389-15210775	distal	intergenic	iDRRE	iDRRE	discordant	concordant	marked	marked	not_marked	presence
PEAK000830	chr2L:15211195-15211599	distal	intergenic	flat	flat	iDRRE	concordant	marked	marked	marked	presence
PEAK000831	chr2L:15211882-15212240	distal	intergenic	flat	flat	flat	concordant	marked	marked	marked	presence
PEAK000832	chr2L:15254559-15254689	proximal	exon	discordant	flat	discordant	concordant	not_marked	marked	not_marked	presence
PEAK000833	chr2L:15264473-15265022	core-promoter	exon;intergenic	iDRRE	flat	flat	concordant	marked	marked	marked	presence
PEAK000834	chr2L:15271212-15271396	proximal	exon	discordant	discordant	discordant	concordant	not_marked	marked	not_marked	presence
PEAK000835	chr2L:15271975-15272135	core-promoter	exon;intergenic	iDRRE	flat	iDRRE	concordant	not_marked	marked	not_marked	presence
PEAK000836	chr2L:15272436-15272571	proximal	intergenic	discordant	discordant	discordant	concordant	not_marked	marked	not_marked	presence
PEAK000837	chr2L:1527448-1527622	distal	intergenic	flat	flat	higher_peak	concordant	not_marked	not_marked	not_marked	absence
PEAK000838	chr2L:15280463-15281054	proximal	intergenic	iDRRE	iDRRE	flat	concordant	not_marked	marked	marked	presence
PEAK000839	chr2L:15281238-15281624	proximal	intergenic	iDRRE	iDRRE	flat	concordant	not_marked	marked	marked	presence
PEAK000840	chr2L:15286355-15286518	proximal	intergenic	discordant	discordant	no_peak	concordant	not_marked	not_marked	not_marked	absence
PEAK000841	chr2L:15286898-15287408	proximal	intergenic	iDRRE	iDRRE	flat	concordant	marked	not_marked	not_marked	presence
PEAK000842	chr2L:15304081-15304417	distal	intergenic	flat	flat	flat	concordant	marked	marked	marked	presence
PEAK000843	chr2L:15304616-15305177	distal	intergenic	flat	flat	flat	concordant	marked	marked	marked	presence
PEAK000844	chr2L:15309776-15310049	distal	intergenic	flat	flat	flat	concordant	not_marked	not_marked	not_marked	absence
PEAK000845	chr2L:15312258-15312894	distal	intergenic	flat	iDRRE	flat	concordant	not_marked	not_marked	not_marked	absence
PEAK000846	chr2L:15313558-15314108	distal	intergenic	iDRRE	flat	flat	concordant	not_marked	marked	not_marked	presence
PEAK000847	chr2L:15314449-15314951	distal	intergenic	flat	flat	flat	concordant	not_marked	marked	not_marked	presence
PEAK000848	chr2L:15323124-15323749	distal	intergenic	flat	flat	flat	concordant	not_marked	not_marked	not_marked	absence
PEAK000849	chr2L:15327299-15327605	distal	intergenic	higher_peak	flat	flat	concordant	not_marked	not_marked	not_marked	absence
PEAK000850	chr2L:15332685-15332847	proximal	intergenic	discordant	discordant	discordant	concordant	not_marked	not_marked	not_marked	absence
PEAK000851	chr2L:15333503-15334003	core-promoter	intergenic;exon	iDRRE	iDRRE	flat	concordant	marked	marked	marked	presence
PEAK000852	chr2L:15339548-15340048	distal	intergenic	flat	flat	flat	concordant	not_marked	not_marked	not_marked	absence
PEAK000853	chr2L:15343327-15343520	distal	intergenic	flat	discordant	discordant	concordant	marked	not_marked	higher_signal	presence
PEAK000854	chr2L:15347065-15347394	distal	intergenic	discordant	no_peak	discordant	concordant	not_marked	not_marked	not_marked	absence
PEAK000855	chr2L:15349085-15349258	distal	intergenic	flat	discordant	flat	concordant	not_marked	not_marked	not_marked	absence
PEAK000856	chr2L:15349497-15349763	distal	intergenic	flat	discordant	flat	concordant	not_marked	marked	not_marked	presence
PEAK000857	chr2L:15353444-15353766	distal	intergenic	flat	flat	flat	concordant	not_marked	not_marked	not_marked	absence
PEAK000858	chr2L:15356855-15357028	distal	intergenic	iDRRE	discordant	discordant	concordant	not_marked	not_marked	not_marked	absence
PEAK000859	chr2L:15359696-15359963	proximal	intergenic	discordant	iDRRE	flat	concordant	not_marked	marked	not_marked	presence
PEAK000860	chr2L:15363259-15364088	proximal	intergenic	flat	iDRRE	flat	concordant	marked	marked	marked	presence
PEAK000861	chr2L:15366493-15367008	distal	intergenic	iDRRE	flat	flat	concordant	not_marked	not_marked	not_marked	absence
PEAK000862	chr2L:15368034-15368374	distal	intergenic	iDRRE	iDRRE	flat	concordant	not_marked	marked	not_marked	presence
PEAK000863	chr2L:15368762-15369539	distal	intergenic	iDRRE	flat	flat	concordant	marked	marked	marked	presence
PEAK000864	chr2L:15375226-15375660	distal	intergenic	flat	flat	lower_peak	concordant	marked	marked	marked	presence
PEAK000865	chr2L:15376061-15376450	distal	intergenic	flat	flat	flat	concordant	marked	marked	marked	presence
PEAK000866	chr2L:15379980-15380174	distal	intergenic	iDRRE	flat	flat	concordant	marked	marked	higher_signal	presence
PEAK000867	chr2L:15380466-15380785	distal	intergenic	flat	discordant	discordant	concordant	marked	not_marked	not_marked	presence
PEAK000868	chr2L:15381415-15381530	distal	intergenic	discordant	discordant	discordant	concordant	not_marked	not_marked	not_marked	absence
PEAK000869	chr2L:1538428-1538745	distal	intergenic	discordant	flat	discordant	concordant	marked	not_marked	marked	presence
PEAK000870	chr2L:15385127-15385455	distal	intergenic	flat	iDRRE	flat	concordant	marked	marked	marked	presence
PEAK000871	chr2L:15385738-15386153	distal	intergenic	flat	flat	flat	concordant	marked	marked	marked	presence
PEAK000872	chr2L:15386377-15386802	distal	intergenic	flat	iDRRE	flat	concordant	marked	marked	marked	presence
PEAK000873	chr2L:15387838-15388255	distal	intergenic	flat	flat	flat	concordant	marked	marked	marked	presence
PEAK000874	chr2L:15388627-15389030	distal	intergenic	flat	iDRRE	flat	concordant	marked	marked	marked	presence
PEAK000875	chr2L:15389279-15389627	distal	intergenic	iDRRE	flat	flat	concordant	marked	marked	marked	presence
PEAK000876	chr2L:15394503-15394819	proximal	intergenic	flat	flat	flat	concordant	marked	marked	marked	presence
PEAK000877	chr2L:15395261-15395910	proximal	intergenic	flat	iDRRE	flat	concordant	marked	marked	marked	presence
PEAK000878	chr2L:15396546-15396918	proximal	exon	iDRRE	flat	flat	concordant	not_marked	marked	not_marked	presence
PEAK000879	chr2L:15401790-15401942	proximal	intergenic	discordant	discordant	discordant	concordant	not_marked	marked	not_marked	presence
PEAK000880	chr2L:15405900-15406535	distal	intergenic	iDRRE	flat	flat	concordant	marked	marked	marked	presence
PEAK000881	chr2L:15406873-15406989	distal	intergenic	discordant	discordant	discordant	concordant	marked	marked	not_marked	presence
PEAK000882	chr2L:15407335-15407586	distal	intergenic	flat	flat	flat	concordant	marked	marked	higher_signal	presence
PEAK000883	chr2L:15407806-15408333	distal	intergenic	flat	flat	flat	concordant	not_marked	not_marked	not_marked	absence
PEAK000884	chr2L:15410640-15410874	distal	intergenic	iDRRE	discordant	flat	concordant	not_marked	marked	not_marked	presence
PEAK000885	chr2L:15413226-15414166	distal	intergenic	flat	iDRRE	flat	concordant	not_marked	marked	not_marked	presence
PEAK000886	chr2L:15414318-15414686	distal	intergenic	flat	flat	flat	concordant	not_marked	not_marked	not_marked	absence
PEAK000887	chr2L:15418099-15418398	core-promoter	exon;intergenic	discordant	discordant	flat	concordant	not_marked	marked	not_marked	presence
PEAK000888	chr2L:15425684-15426252	proximal	intergenic	flat	iDRRE	flat	concordant	marked	marked	marked	presence
PEAK000889	chr2L:15438902-15439086	distal	intergenic	discordant	flat	discordant	concordant	not_marked	not_marked	not_marked	absence
PEAK000890	chr2L:15439825-15440050	proximal	intergenic	discordant	discordant	discordant	concordant	not_marked	not_marked	not_marked	absence
PEAK000891	chr2L:15444030-15444176	distal	intergenic	discordant	no_peak	discordant	concordant	not_marked	marked	not_marked	presence
PEAK000892	chr2L:15457544-15458046	distal	intergenic	iDRRE	flat	flat	concordant	marked	marked	higher_signal	presence
PEAK000893	chr2L:15458466-15458863	distal	intergenic	flat	flat	flat	concordant	marked	marked	higher_signal	presence
PEAK000894	chr2L:15461349-15461555	proximal	intergenic	flat	flat	discordant	concordant	marked	marked	not_marked	presence
PEAK000895	chr2L:15462364-15462595	proximal	intergenic	flat	flat	flat	concordant	not_marked	marked	marked	presence
PEAK000896	chr2L:15463304-15463591	core-promoter	exon	flat	flat	flat	concordant	not_marked	marked	not_marked	presence
PEAK000897	chr2L:15463805-15464321	proximal	intergenic	flat	flat	flat	concordant	not_marked	marked	not_marked	presence
PEAK000898	chr2L:15474740-15475166	distal	intergenic	flat	flat	discordant	concordant	not_marked	marked	higher_signal	presence
PEAK000899	chr2L:15482090-15482481	distal	intergenic	iDRRE	flat	flat	concordant	not_marked	marked	not_marked	presence
PEAK000900	chr2L:15482770-15483206	proximal	intergenic	flat	flat	flat	concordant	not_marked	marked	not_marked	presence
PEAK000901	chr2L:15484094-15484502	proximal	intergenic	flat	iDRRE	iDRRE	concordant	marked	marked	not_marked	presence
PEAK000902	chr2L:15498891-15499203	core-promoter	intergenic;exon	iDRRE	flat	flat	concordant	marked	marked	marked	presence
PEAK000903	chr2L:15499263-15499704	first-intron	intron;exon	flat	flat	iDRRE	concordant	marked	marked	marked	presence
PEAK000904	chr2L:15500204-15500429	first-intron	intron	iDRRE	flat	discordant	concordant	not_marked	marked	marked	presence
PEAK000905	chr2L:155278-155395	core-promoter	exon	discordant	discordant	flat	concordant	not_marked	marked	marked	presence
PEAK000906	chr2L:1554368-1554574	proximal	intergenic	flat	flat	flat	concordant	not_marked	marked	marked	presence
PEAK000907	chr2L:1554878-1555513	core-promoter	exon;intergenic	flat	flat	flat	concordant	marked	marked	marked	presence
PEAK000908	chr2L:155536-155689	proximal	exon	flat	iDRRE	lower_peak	concordant	not_marked	marked	marked	presence
PEAK000909	chr2L:1556664-1557015	proximal	exon;intron	flat	flat	discordant	concordant	not_marked	not_marked	not_marked	absence
PEAK000910	chr2L:1559383-1559906	distal	intron	lower_peak	flat	iDRRE	concordant	not_marked	not_marked	not_marked	absence
PEAK000911	chr2L:156058-156185	core-promoter	exon	iDRRE	flat	flat	concordant	not_marked	marked	marked	presence
PEAK000912	chr2L:15643900-15644051	distal	intergenic	flat	flat	iDRRE	concordant	not_marked	not_marked	not_marked	absence
PEAK000913	chr2L:15683398-15683558	distal	intron	discordant	discordant	discordant	concordant	not_marked	not_marked	higher_signal	presence
PEAK000914	chr2L:1568953-1569597	distal	intron	flat	flat	flat	concordant	not_marked	marked	not_marked	presence
PEAK000915	chr2L:1570301-1570640	distal	intron	flat	flat	flat	concordant	not_marked	marked	not_marked	presence
PEAK000916	chr2L:15718393-15718591	proximal	intergenic	discordant	flat	flat	concordant	not_marked	not_marked	higher_signal	presence
PEAK000917	chr2L:1573607-1574026	distal	intron	iDRRE	iDRRE	flat	concordant	marked	not_marked	higher_signal	presence
PEAK000918	chr2L:1574310-1574483	distal	intron	discordant	flat	discordant	concordant	marked	not_marked	not_marked	presence
PEAK000919	chr2L:15743138-15743607	distal	intron	flat	flat	flat	concordant	marked	marked	marked	presence
PEAK000920	chr2L:15743834-15744368	proximal	intron	iDRRE	flat	flat	concordant	marked	marked	marked	presence
PEAK000921	chr2L:15745560-15745846	proximal	exon;intron	iDRRE	flat	flat	concordant	not_marked	not_marked	not_marked	absence
PEAK000922	chr2L:15746583-15746990	first-intron	exon	flat	iDRRE	flat	concordant	marked	not_marked	marked	presence
PEAK000923	chr2L:15748031-15748263	core-promoter	exon	flat	flat	flat	concordant	marked	marked	marked	presence
PEAK000924	chr2L:15751046-15751198	core-promoter	exon;intergenic	iDRRE	flat	flat	concordant	marked	marked	marked	presence
PEAK000925	chr2L:15752215-15752323	core-promoter	exon;intergenic	iDRRE	flat	flat	concordant	marked	marked	marked	presence
PEAK000926	chr2L:15760680-15760926	first-intron	intron	flat	flat	flat	concordant	not_marked	not_marked	not_marked	absence
PEAK000927	chr2L:15761507-15762024	first-intron	intron	flat	flat	flat	concordant	not_marked	not_marked	marked	presence
PEAK000928	chr2L:15762349-15762845	core-promoter	exon;intergenic	flat	flat	flat	concordant	not_marked	not_marked	marked	presence
PEAK000929	chr2L:15764123-15764264	core-promoter	exon;intergenic	iDRRE	flat	iDRRE	concordant	marked	marked	marked	presence
PEAK000930	chr2L:15771114-15771235	core-promoter	exon;intergenic	iDRRE	lower_peak	flat	concordant	not_marked	marked	not_marked	presence
PEAK000931	chr2L:1578990-1579295	distal	intron	flat	flat	flat	concordant	not_marked	not_marked	not_marked	absence
PEAK000932	chr2L:15815208-15815491	distal	intergenic	flat	flat	flat	concordant	not_marked	not_marked	not_marked	absence
PEAK000933	chr2L:1581568-1581712	distal	intron	no_peak	discordant	discordant	concordant	not_marked	not_marked	not_marked	absence
PEAK000934	chr2L:158901-159083	core-promoter	exon;intergenic	iDRRE	flat	flat	concordant	not_marked	marked	marked	presence
PEAK000935	chr2L:15905566-15905799	distal	exon	flat	flat	flat	concordant	not_marked	not_marked	not_marked	absence
PEAK000936	chr2L:15908821-15909300	distal	intron	discordant	flat	flat	concordant	not_marked	not_marked	not_marked	absence
PEAK000937	chr2L:15910839-15911150	proximal	intron	discordant	flat	iDRRE	concordant	marked	marked	marked	presence
PEAK000938	chr2L:15911366-15912053	core-promoter	exon;intron	flat	flat	flat	concordant	marked	marked	marked	presence
PEAK000939	chr2L:15928791-15929179	distal	intron	flat	flat	flat	concordant	not_marked	marked	not_marked	presence
PEAK000940	chr2L:1596678-1597254	distal	intron	flat	iDRRE	iDRRE	concordant	marked	marked	not_marked	presence
PEAK000941	chr2L:1603516-1603855	distal	exon;intron	discordant	flat	discordant	concordant	marked	marked	marked	presence
PEAK000942	chr2L:1604134-1604520	distal	exon;intron	flat	flat	flat	concordant	not_marked	marked	not_marked	presence
PEAK000943	chr2L:160420-161216	proximal	exon	iDRRE	flat	flat	concordant	not_marked	marked	marked	presence
PEAK000944	chr2L:16049689-16049863	proximal	intergenic	flat	flat	iDRRE	concordant	higher_signal	not_marked	marked	presence
PEAK000945	chr2L:16085020-16085217	distal	intergenic	discordant	discordant	discordant	concordant	not_marked	not_marked	not_marked	absence
PEAK000946	chr2L:1611093-1611211	core-promoter	exon;intergenic	iDRRE	flat	iDRRE	concordant	not_marked	marked	marked	presence
PEAK000947	chr2L:161398-162230	distal	exon	flat	flat	flat	concordant	marked	marked	marked	presence
PEAK000948	chr2L:1614091-1614312	core-promoter	exon;intergenic	iDRRE	flat	flat	concordant	not_marked	marked	marked	presence
PEAK000949	chr2L:16187453-16187630	distal	exon;intron	flat	flat	iDRRE	concordant	not_marked	not_marked	not_marked	absence
PEAK000950	chr2L:16187958-16188379	distal	intron	iDRRE	lower_peak	iDRRE	concordant	not_marked	not_marked	not_marked	absence
PEAK000951	chr2L:16223805-16223997	distal	intergenic	discordant	lower_peak	flat	concordant	not_marked	not_marked	not_marked	absence
PEAK000952	chr2L:16234921-16235168	first-intron	intron	iDRRE	iDRRE	flat	concordant	not_marked	not_marked	not_marked	absence
PEAK000953	chr2L:16251642-16251937	distal	exon;intron	iDRRE	iDRRE	flat	concordant	not_marked	not_marked	marked	presence
PEAK000954	chr2L:16253059-16253330	distal	intron	flat	flat	iDRRE	concordant	not_marked	not_marked	not_marked	absence
PEAK000955	chr2L:16255502-16256051	proximal	exon;intron	iDRRE	iDRRE	flat	concordant	not_marked	not_marked	not_marked	absence
PEAK000956	chr2L:16257540-16257680	core-promoter	exon;intergenic	discordant	discordant	iDRRE	concordant	not_marked	marked	not_marked	presence
PEAK000957	chr2L:16261660-16261812	core-promoter	exon	iDRRE	discordant	discordant	concordant	not_marked	marked	marked	presence
PEAK000958	chr2L:16267303-16267645	distal	intron	iDRRE	discordant	discordant	concordant	marked	marked	marked	presence
PEAK000959	chr2L:16267965-16268428	distal	intron	flat	iDRRE	flat	concordant	not_marked	not_marked	higher_signal	presence
PEAK000960	chr2L:16269029-16269924	distal	intron	iDRRE	iDRRE	flat	concordant	not_marked	marked	not_marked	presence
PEAK000961	chr2L:16271497-16271721	distal	intron	flat	flat	flat	concordant	not_marked	not_marked	not_marked	absence
PEAK000962	chr2L:16273600-16273740	distal	intron	discordant	discordant	flat	concordant	not_marked	not_marked	not_marked	absence
PEAK000963	chr2L:16280022-16280306	first-intron	intron	iDRRE	flat	flat	concordant	not_marked	marked	not_marked	presence
PEAK000964	chr2L:16281421-16281657	first-intron	intron	iDRRE	flat	flat	concordant	not_marked	marked	marked	presence
PEAK000965	chr2L:16281962-16282455	first-intron	intron	iDRRE	iDRRE	flat	concordant	not_marked	marked	marked	presence
PEAK000966	chr2L:16284259-16285130	first-intron	intron	iDRRE	iDRRE	flat	concordant	not_marked	not_marked	not_marked	absence
PEAK000967	chr2L:16286567-16286962	first-intron	intron	iDRRE	iDRRE	flat	concordant	not_marked	marked	marked	presence
PEAK000968	chr2L:16287339-16287514	proximal	exon	iDRRE	flat	flat	concordant	not_marked	marked	marked	presence
PEAK000969	chr2L:16287640-16287834	core-promoter	exon;intergenic	iDRRE	iDRRE	flat	concordant	not_marked	marked	marked	presence
PEAK000970	chr2L:16292983-16293510	core-promoter	exon;intergenic	flat	flat	flat	concordant	marked	marked	not_marked	presence
PEAK000971	chr2L:16299479-16299915	core-promoter	exon;intergenic	iDRRE	flat	flat	concordant	marked	marked	marked	presence
PEAK000972	chr2L:16307275-16307407	core-promoter	exon;intergenic	discordant	discordant	flat	concordant	marked	marked	marked	presence
PEAK000973	chr2L:16310668-16310779	core-promoter	exon;intergenic	discordant	discordant	discordant	concordant	marked	marked	marked	presence
PEAK000974	chr2L:16315071-16315401	distal	intron	flat	flat	flat	concordant	marked	marked	marked	presence
PEAK000975	chr2L:16321501-16321660	distal	intron	iDRRE	discordant	flat	concordant	not_marked	not_marked	not_marked	absence
PEAK000976	chr2L:16323385-16323858	distal	exon;intron	iDRRE	flat	flat	concordant	marked	not_marked	higher_signal	presence
PEAK000977	chr2L:16324895-16325214	proximal	exon	iDRRE	flat	flat	concordant	marked	marked	marked	presence
PEAK000978	chr2L:16325573-16325668	first-intron	exon;intron	discordant	discordant	lower_peak	concordant	not_marked	marked	marked	presence
PEAK000979	chr2L:16325833-16326151	core-promoter	exon;intron	flat	flat	flat	concordant	not_marked	not_marked	marked	presence
PEAK000980	chr2L:16329094-16329256	core-promoter	exon;intergenic	iDRRE	flat	flat	concordant	marked	marked	marked	presence
PEAK000981	chr2L:16350232-16350454	first-intron	exon;intron	flat	iDRRE	flat	concordant	not_marked	not_marked	not_marked	absence
PEAK000982	chr2L:16350720-16351143	first-intron	intron	iDRRE	flat	flat	concordant	not_marked	not_marked	not_marked	absence
PEAK000983	chr2L:16351303-16351740	first-intron	intron	iDRRE	flat	flat	concordant	not_marked	not_marked	not_marked	absence
PEAK000984	chr2L:16352102-16352217	proximal	exon	discordant	discordant	flat	concordant	not_marked	marked	not_marked	presence
PEAK000985	chr2L:16352574-16352677	core-promoter	exon;intergenic	flat	iDRRE	flat	concordant	not_marked	marked	marked	presence
PEAK000986	chr2L:16352895-16353469	core-promoter	exon;intron;intergenic	iDRRE	flat	flat	concordant	not_marked	marked	marked	presence
PEAK000987	chr2L:16353869-16354170	proximal	exon	iDRRE	flat	flat	concordant	not_marked	marked	marked	presence
PEAK000988	chr2L:16356662-16356794	core-promoter	exon;intergenic	discordant	discordant	flat	concordant	marked	marked	marked	presence
PEAK000989	chr2L:1638466-1638612	distal	intergenic	discordant	discordant	discordant	concordant	not_marked	not_marked	not_marked	absence
PEAK000990	chr2L:1639292-1639411	distal	intergenic	discordant	discordant	discordant	concordant	not_marked	not_marked	not_marked	absence
PEAK000991	chr2L:16402043-16402691	distal	intron	flat	flat	flat	concordant	not_marked	marked	not_marked	presence
PEAK000992	chr2L:16406801-16407395	first-intron	intron	flat	flat	flat	concordant	not_marked	not_marked	marked	presence
PEAK000993	chr2L:16407661-16407976	first-intron	intron	flat	flat	flat	concordant	not_marked	not_marked	marked	presence
PEAK000994	chr2L:16413537-16414044	first-intron	intron	flat	flat	flat	concordant	not_marked	not_marked	not_marked	absence
PEAK000995	chr2L:16422624-16423047	first-intron	intron	iDRRE	flat	iDRRE	concordant	not_marked	not_marked	not_marked	absence
PEAK000996	chr2L:1643076-1643286	distal	intergenic	flat	flat	flat	concordant	marked	not_marked	not_marked	presence
PEAK000997	chr2L:1643536-1643864	distal	intergenic	flat	iDRRE	flat	concordant	marked	not_marked	not_marked	presence
PEAK000998	chr2L:16437660-16437930	first-intron	intron	discordant	discordant	discordant	concordant	not_marked	not_marked	higher_signal	presence
PEAK000999	chr2L:16438429-16438914	first-intron	intron	flat	iDRRE	flat	concordant	not_marked	not_marked	not_marked	absence
PEAK001000	chr2L:16441542-16441952	first-intron	intron	iDRRE	flat	iDRRE	concordant	marked	not_marked	not_marked	presence
PEAK001001	chr2L:1644401-1644708	distal	intergenic	flat	flat	iDRRE	concordant	not_marked	higher_signal	higher_signal	presence
PEAK001002	chr2L:16448388-16448560	core-promoter	exon;intron	iDRRE	iDRRE	flat	concordant	not_marked	not_marked	not_marked	absence
PEAK001003	chr2L:16448840-16449122	proximal	exon	iDRRE	flat	flat	concordant	not_marked	not_marked	not_marked	absence
PEAK001004	chr2L:16453391-16453882	distal	exon	iDRRE	flat	flat	concordant	not_marked	not_marked	not_marked	absence
PEAK001005	chr2L:16454909-16455465	distal	exon;intergenic	flat	flat	iDRRE	concordant	not_marked	marked	higher_signal	presence
PEAK001006	chr2L:16455539-16455875	distal	intergenic	flat	discordant	discordant	concordant	not_marked	marked	not_marked	presence
PEAK001007	chr2L:16458555-16458776	distal	intergenic	flat	discordant	flat	concordant	not_marked	not_marked	not_marked	absence
PEAK001008	chr2L:16463459-16464045	distal	intergenic	flat	flat	flat	concordant	not_marked	not_marked	not_marked	absence
PEAK001009	chr2L:16465324-16465588	distal	intergenic	discordant	discordant	no_peak	concordant	not_marked	not_marked	marked	presence
PEAK001010	chr2L:16477582-16477949	distal	intron	flat	flat	flat	concordant	not_marked	marked	higher_signal	presence
PEAK001011	chr2L:16485630-16486595	core-promoter	exon;intergenic	flat	flat	flat	concordant	marked	marked	marked	presence
PEAK001012	chr2L:16486786-16486938	proximal	intergenic	higher_peak	discordant	discordant	concordant	not_marked	not_marked	not_marked	absence
PEAK001013	chr2L:16487710-16487821	proximal	intergenic	discordant	flat	iDRRE	concordant	not_marked	not_marked	not_marked	absence
PEAK001014	chr2L:1648809-1649259	proximal	intergenic	flat	iDRRE	flat	concordant	not_marked	not_marked	higher_signal	presence
PEAK001015	chr2L:16491732-16491923	proximal	exon	discordant	discordant	flat	concordant	not_marked	marked	marked	presence
PEAK001016	chr2L:16492000-16492174	first-intron	exon;intron	iDRRE	discordant	iDRRE	concordant	not_marked	marked	marked	presence
PEAK001017	chr2L:16492473-16492666	first-intron	intron	iDRRE	flat	flat	concordant	not_marked	marked	not_marked	presence
PEAK001018	chr2L:16492822-16493063	first-intron	intron	flat	flat	flat	concordant	not_marked	marked	not_marked	presence
PEAK001019	chr2L:1649549-1649682	proximal	intergenic	discordant	flat	higher_peak	concordant	not_marked	not_marked	higher_signal	presence
PEAK001020	chr2L:1649859-1650161	proximal	intergenic	iDRRE	iDRRE	iDRRE	concordant	not_marked	not_marked	higher_signal	presence
PEAK001021	chr2L:16507784-16507892	distal	intergenic	discordant	discordant	discordant	concordant	not_marked	not_marked	not_marked	absence
PEAK001022	chr2L:1651119-1651468	core-promoter	exon;intergenic	flat	iDRRE	flat	concordant	marked	marked	marked	presence
PEAK001023	chr2L:16520190-16520378	distal	intron	iDRRE	flat	lower_peak	concordant	not_marked	marked	marked	presence
PEAK001024	chr2L:16520593-16520968	distal	intron	iDRRE	flat	flat	concordant	not_marked	marked	marked	presence
PEAK001025	chr2L:16521318-16521678	distal	intron	flat	iDRRE	flat	concordant	marked	marked	marked	presence
PEAK001026	chr2L:16525166-16525517	distal	intron	iDRRE	iDRRE	flat	concordant	not_marked	marked	not_marked	presence
PEAK001027	chr2L:16525822-16526513	distal	intron	iDRRE	flat	flat	concordant	not_marked	marked	marked	presence
PEAK001028	chr2L:16532778-16533151	core-promoter	exon;intergenic	iDRRE	flat	flat	concordant	not_marked	marked	marked	presence
PEAK001029	chr2L:16533318-16533683	proximal	intergenic	iDRRE	flat	flat	concordant	not_marked	marked	marked	presence
PEAK001030	chr2L:16534254-16534564	core-promoter	exon;intergenic	iDRRE	flat	flat	concordant	not_marked	marked	higher_signal	presence
PEAK001031	chr2L:16535705-16535877	proximal	intergenic	iDRRE	iDRRE	flat	concordant	not_marked	not_marked	higher_signal	presence
PEAK001032	chr2L:16543966-16544195	proximal	intergenic	iDRRE	flat	flat	concordant	not_marked	not_marked	not_marked	absence
PEAK001033	chr2L:16544796-16545021	core-promoter	exon;intergenic	iDRRE	iDRRE	iDRRE	concordant	not_marked	not_marked	not_marked	absence
PEAK001034	chr2L:16545568-16545976	first-intron	intron	flat	iDRRE	flat	concordant	not_marked	not_marked	not_marked	absence
PEAK001035	chr2L:16548128-16548426	first-intron	intron	iDRRE	flat	flat	concordant	not_marked	not_marked	not_marked	absence
PEAK001036	chr2L:165638-165826	distal	intron	discordant	iDRRE	flat	concordant	not_marked	marked	marked	presence
PEAK001037	chr2L:1657101-1657481	distal	intron	flat	flat	flat	concordant	not_marked	not_marked	not_marked	absence
PEAK001038	chr2L:1658043-1658558	distal	intron	flat	flat	iDRRE	concordant	not_marked	not_marked	not_marked	absence
PEAK001039	chr2L:16587889-16588374	distal	intron	iDRRE	flat	flat	concordant	not_marked	not_marked	not_marked	absence
PEAK001040	chr2L:16588607-16588856	distal	intron	iDRRE	flat	flat	concordant	not_marked	not_marked	not_marked	absence
PEAK001041	chr2L:16590545-16590809	distal	intron	flat	flat	flat	concordant	not_marked	marked	not_marked	presence
PEAK001042	chr2L:16591083-16591542	distal	intron	flat	flat	flat	concordant	not_marked	marked	higher_signal	presence
PEAK001043	chr2L:16594344-16594602	distal	intron	discordant	discordant	flat	concordant	not_marked	not_marked	not_marked	absence
PEAK001044	chr2L:16594714-16594962	distal	intron	iDRRE	flat	flat	concordant	not_marked	not_marked	not_marked	absence
PEAK001045	chr2L:16598016-16598425	distal	intron	iDRRE	flat	flat	concordant	not_marked	not_marked	marked	presence
PEAK001046	chr2L:16600048-16600534	distal	intron	iDRRE	flat	flat	concordant	not_marked	not_marked	not_marked	absence
PEAK001047	chr2L:16601478-16601975	distal	exon;intron	iDRRE	iDRRE	flat	concordant	not_marked	not_marked	marked	presence
PEAK001048	chr2L:16602513-16602619	distal	intron	discordant	discordant	flat	concordant	not_marked	not_marked	marked	presence
PEAK001049	chr2L:16605063-16605293	proximal	intron	flat	higher_peak	discordant	concordant	not_marked	not_marked	not_marked	absence
PEAK001050	chr2L:166085-167144	distal	intron	iDRRE	iDRRE	flat	concordant	not_marked	marked	marked	presence
PEAK001051	chr2L:16611406-16611506	distal	intron	discordant	discordant	discordant	concordant	not_marked	not_marked	not_marked	absence
PEAK001052	chr2L:16612840-16613275	distal	intron	flat	iDRRE	flat	concordant	not_marked	marked	not_marked	presence
PEAK001053	chr2L:16619269-16619609	distal	intron	flat	iDRRE	flat	concordant	marked	not_marked	not_marked	presence
PEAK001054	chr2L:16620158-16620471	distal	intron	iDRRE	flat	flat	concordant	not_marked	not_marked	not_marked	absence
PEAK001055	chr2L:16638783-16639074	distal	intron	iDRRE	discordant	flat	concordant	not_marked	not_marked	higher_signal	presence
PEAK001056	chr2L:16645561-16646035	distal	intron	flat	flat	flat	concordant	not_marked	not_marked	not_marked	absence
PEAK001057	chr2L:16656657-16656853	distal	intron	iDRRE	flat	flat	concordant	not_marked	not_marked	not_marked	absence
PEAK001058	chr2L:16657010-16657148	distal	exon;intron	iDRRE	flat	iDRRE	concordant	marked	marked	marked	presence
PEAK001059	chr2L:16662191-16662390	distal	exon	flat	flat	flat	concordant	not_marked	not_marked	not_marked	absence
PEAK001060	chr2L:1666841-1667142	distal	intron	iDRRE	discordant	discordant	concordant	not_marked	marked	higher_signal	presence
PEAK001061	chr2L:1667533-1667799	distal	intron	flat	flat	flat	concordant	not_marked	marked	higher_signal	presence
PEAK001062	chr2L:16677056-16677211	core-promoter	exon;intergenic	discordant	discordant	flat	concordant	marked	marked	marked	presence
PEAK001063	chr2L:16679949-16680138	core-promoter	exon;intergenic	iDRRE	flat	iDRRE	concordant	not_marked	not_marked	not_marked	absence
PEAK001064	chr2L:16680420-16680597	first-intron	exon;intron	iDRRE	flat	flat	concordant	not_marked	marked	not_marked	presence
PEAK001065	chr2L:1668263-1668902	distal	intron	flat	flat	iDRRE	concordant	not_marked	marked	higher_signal	presence
PEAK001066	chr2L:16683592-16683823	first-intron	exon;intron	flat	iDRRE	flat	concordant	not_marked	marked	not_marked	presence
PEAK001067	chr2L:16684759-16684875	proximal	intron	flat	iDRRE	flat	concordant	not_marked	marked	marked	presence
PEAK001068	chr2L:16685161-16685427	proximal	exon;intron	iDRRE	iDRRE	flat	concordant	not_marked	marked	marked	presence
PEAK001069	chr2L:16686573-16687138	distal	intron	iDRRE	flat	flat	concordant	not_marked	marked	not_marked	presence
PEAK001070	chr2L:16689715-16689965	distal	intron	iDRRE	iDRRE	flat	concordant	not_marked	not_marked	not_marked	absence
PEAK001071	chr2L:16690344-16690729	distal	intron	flat	flat	lower_peak	concordant	marked	marked	not_marked	presence
PEAK001072	chr2L:1669684-1670002	distal	intron	flat	flat	flat	concordant	not_marked	not_marked	higher_signal	presence
PEAK001073	chr2L:16703192-16703341	core-promoter	exon;intergenic	iDRRE	flat	lower_peak	concordant	not_marked	marked	not_marked	presence
PEAK001074	chr2L:16716032-16716822	core-promoter	exon;intron	iDRRE	flat	flat	concordant	marked	marked	marked	presence
PEAK001075	chr2L:16719883-16719982	core-promoter	exon;intron;intergenic	discordant	flat	flat	concordant	not_marked	marked	marked	presence
PEAK001076	chr2L:16720316-16720768	first-intron	intron	iDRRE	flat	flat	concordant	not_marked	marked	marked	presence
PEAK001077	chr2L:16721151-16721339	first-intron	intron	iDRRE	flat	flat	concordant	not_marked	marked	not_marked	presence
PEAK001078	chr2L:16727753-16727908	core-promoter	exon;intergenic	iDRRE	flat	flat	concordant	marked	marked	marked	presence
PEAK001079	chr2L:16729635-16729849	core-promoter	exon;intergenic	iDRRE	discordant	flat	concordant	higher_signal	marked	not_marked	presence
PEAK001080	chr2L:16732083-16732195	core-promoter	exon;intergenic	iDRRE	discordant	flat	concordant	not_marked	marked	marked	presence
PEAK001081	chr2L:16738356-16738487	core-promoter	exon;intergenic	flat	flat	flat	concordant	marked	marked	marked	presence
PEAK001082	chr2L:16743056-16743193	core-promoter	exon;intergenic	flat	flat	flat	concordant	marked	marked	marked	presence
PEAK001083	chr2L:16743609-16743761	first-intron	exon;intron	iDRRE	flat	flat	concordant	marked	marked	marked	presence
PEAK001084	chr2L:16754096-16754568	core-promoter	exon;intergenic	flat	flat	flat	concordant	not_marked	marked	marked	presence
PEAK001085	chr2L:16776964-16777335	distal	exon	discordant	flat	flat	concordant	marked	marked	marked	presence
PEAK001086	chr2L:16783911-16784321	distal	exon;intron	discordant	flat	discordant	concordant	marked	marked	marked	presence
PEAK001087	chr2L:16791401-16791696	core-promoter	exon;intergenic	flat	flat	flat	concordant	not_marked	not_marked	not_marked	absence
PEAK001088	chr2L:16806973-16807578	first-intron	exon;intron	flat	iDRRE	flat	concordant	marked	marked	marked	presence
PEAK001089	chr2L:16816075-16816214	first-intron	intron	iDRRE	discordant	flat	concordant	not_marked	not_marked	not_marked	absence
PEAK001090	chr2L:16816599-16816752	core-promoter	exon;intron	iDRRE	flat	flat	concordant	not_marked	not_marked	not_marked	absence
PEAK001091	chr2L:16816890-16817109	first-intron	exon;intron	flat	flat	flat	concordant	not_marked	not_marked	not_marked	absence
PEAK001092	chr2L:16817314-16817629	first-intron	exon;intron	flat	flat	flat	concordant	not_marked	not_marked	not_marked	absence
PEAK001093	chr2L:16824856-16825026	first-intron	exon;intron	iDRRE	flat	flat	concordant	not_marked	marked	marked	presence
PEAK001094	chr2L:16825123-16825289	core-promoter	exon;intron	iDRRE	flat	flat	concordant	not_marked	marked	marked	presence
PEAK001095	chr2L:16827244-16827432	first-intron	exon;intron	flat	flat	flat	concordant	marked	marked	marked	presence
PEAK001096	chr2L:16842874-16843157	distal	exon	flat	iDRRE	flat	concordant	marked	marked	marked	presence
PEAK001097	chr2L:16847101-16847420	proximal	exon;intron	flat	flat	flat	concordant	not_marked	not_marked	marked	presence
PEAK001098	chr2L:168483-168733	distal	intron	flat	flat	flat	concordant	not_marked	not_marked	not_marked	absence
PEAK001099	chr2L:16852146-16852488	core-promoter	exon;intron;intergenic	iDRRE	flat	iDRRE	concordant	not_marked	not_marked	not_marked	absence
PEAK001100	chr2L:16857868-16858168	first-intron	intron	discordant	discordant	discordant	concordant	not_marked	not_marked	not_marked	absence
PEAK001101	chr2L:16858348-16858877	core-promoter	exon;intergenic	flat	lower_peak	flat	concordant	not_marked	not_marked	not_marked	absence
PEAK001102	chr2L:16859306-16859538	proximal	intergenic	flat	flat	flat	concordant	not_marked	not_marked	not_marked	absence
PEAK001103	chr2L:16867247-16867614	proximal	intergenic	flat	flat	lower_peak	concordant	marked	not_marked	not_marked	presence
PEAK001104	chr2L:16869335-16869495	core-promoter	exon;intergenic	discordant	discordant	discordant	concordant	marked	not_marked	marked	presence
PEAK001105	chr2L:16880942-16881516	proximal	exon;intron	flat	iDRRE	flat	concordant	marked	marked	marked	presence
PEAK001106	chr2L:16881634-16881872	distal	exon;intron	flat	flat	flat	concordant	marked	marked	marked	presence
PEAK001107	chr2L:16882104-16882334	distal	intron	discordant	flat	discordant	concordant	not_marked	marked	marked	presence
PEAK001108	chr2L:16887916-16888110	core-promoter	exon;intergenic	flat	flat	flat	concordant	not_marked	marked	marked	presence
PEAK001109	chr2L:16888364-16888531	core-promoter	exon;intergenic	flat	iDRRE	flat	concordant	not_marked	marked	marked	presence
PEAK001110	chr2L:16888882-16889138	first-intron	exon;intron	flat	iDRRE	flat	concordant	not_marked	marked	marked	presence
PEAK001111	chr2L:1689569-1689871	distal	intron	discordant	discordant	discordant	concordant	not_marked	marked	not_marked	presence
PEAK001112	chr2L:16902168-16902300	core-promoter	exon;intron	iDRRE	lower_peak	iDRRE	concordant	not_marked	marked	not_marked	presence
PEAK001113	chr2L:16927256-16927860	distal	intergenic	lower_peak	lower_peak	lower_peak	concordant	not_marked	not_marked	marked	presence
PEAK001114	chr2L:16972762-16973118	core-promoter	exon;intergenic	flat	flat	flat	concordant	not_marked	not_marked	not_marked	absence
PEAK001115	chr2L:17102357-17102750	distal	intergenic	iDRRE	flat	iDRRE	concordant	not_marked	higher_signal	not_marked	presence
PEAK001116	chr2L:1710334-1710539	core-promoter	exon;intron;intergenic	flat	iDRRE	flat	concordant	marked	marked	marked	presence
PEAK001117	chr2L:171469-171991	distal	intron	iDRRE	flat	flat	concordant	not_marked	not_marked	higher_signal	presence
PEAK001118	chr2L:17156172-17156471	distal	intron	discordant	lower_peak	flat	concordant	not_marked	not_marked	not_marked	absence
PEAK001119	chr2L:1715806-1715985	core-promoter	exon;intergenic	iDRRE	iDRRE	flat	concordant	marked	marked	marked	presence
PEAK001120	chr2L:17172275-17172744	proximal	exon	flat	flat	flat	concordant	not_marked	not_marked	not_marked	absence
PEAK001121	chr2L:17194671-17194960	distal	intron	discordant	flat	higher_peak	concordant	higher_signal	not_marked	not_marked	presence
PEAK001122	chr2L:17195253-17195440	distal	intron	discordant	discordant	flat	concordant	higher_signal	not_marked	not_marked	presence
PEAK001123	chr2L:17206738-17207131	distal	intron	flat	flat	iDRRE	concordant	not_marked	not_marked	not_marked	absence
PEAK001124	chr2L:17207382-17207646	distal	intron	flat	flat	iDRRE	concordant	not_marked	not_marked	not_marked	absence
PEAK001125	chr2L:17217101-17217438	distal	intron	iDRRE	flat	iDRRE	concordant	not_marked	not_marked	not_marked	absence
PEAK001126	chr2L:17217565-17217700	distal	intron	discordant	discordant	discordant	concordant	not_marked	not_marked	not_marked	absence
PEAK001127	chr2L:17231356-17231735	distal	intron	discordant	flat	iDRRE	concordant	not_marked	not_marked	not_marked	absence
PEAK001128	chr2L:1723158-1723567	first-intron	intron	iDRRE	flat	flat	concordant	marked	marked	marked	presence
PEAK001129	chr2L:17233677-17233865	distal	intron	higher_peak	no_peak	discordant	concordant	not_marked	not_marked	not_marked	absence
PEAK001130	chr2L:1723727-1723970	first-intron	exon;intron	iDRRE	iDRRE	flat	concordant	marked	marked	marked	presence
PEAK001131	chr2L:1724300-1724526	core-promoter	exon;intergenic	iDRRE	flat	flat	concordant	marked	marked	marked	presence
PEAK001132	chr2L:17243018-17243507	distal	intron	flat	flat	iDRRE	concordant	not_marked	not_marked	not_marked	absence
PEAK001133	chr2L:17243656-17243895	distal	intron	flat	flat	iDRRE	concordant	not_marked	not_marked	not_marked	absence
PEAK001134	chr2L:17244601-17244886	proximal	intron	iDRRE	flat	flat	concordant	not_marked	marked	not_marked	presence
PEAK001135	chr2L:17245858-17246142	proximal	exon	iDRRE	flat	iDRRE	concordant	marked	marked	marked	presence
PEAK001136	chr2L:17260637-17260980	core-promoter	exon;intergenic	iDRRE	flat	flat	concordant	not_marked	not_marked	marked	presence
PEAK001137	chr2L:17263317-17263614	distal	intergenic	flat	flat	flat	concordant	not_marked	not_marked	higher_signal	presence
PEAK001138	chr2L:17268016-17268741	distal	intergenic	flat	flat	iDRRE	concordant	not_marked	not_marked	marked	presence
PEAK001139	chr2L:1727637-1727842	proximal	exon	flat	flat	flat	concordant	not_marked	marked	marked	presence
PEAK001140	chr2L:1727992-1728123	proximal	exon;intron	iDRRE	flat	flat	concordant	not_marked	not_marked	marked	presence
PEAK001141	chr2L:17284784-17284887	proximal	intergenic	discordant	discordant	discordant	concordant	not_marked	not_marked	not_marked	absence
PEAK001142	chr2L:172858-173025	distal	intron	flat	discordant	flat	concordant	not_marked	not_marked	not_marked	absence
PEAK001143	chr2L:1729805-1730114	core-promoter	exon;intergenic	flat	iDRRE	flat	concordant	marked	marked	marked	presence
PEAK001144	chr2L:1732278-1732467	core-promoter	exon;intergenic	iDRRE	flat	flat	concordant	not_marked	not_marked	not_marked	absence
PEAK001145	chr2L:17336631-17336714	distal	intergenic	discordant	flat	discordant	concordant	not_marked	not_marked	not_marked	absence
PEAK001146	chr2L:1737292-1737565	first-intron	exon;intron	flat	iDRRE	flat	concordant	marked	not_marked	marked	presence
PEAK001147	chr2L:17380741-17380965	first-intron	intron	flat	flat	flat	concordant	marked	not_marked	not_marked	presence
PEAK001148	chr2L:17383697-17383866	proximal	exon	discordant	discordant	flat	concordant	marked	marked	marked	presence
PEAK001149	chr2L:17383949-17384234	core-promoter	exon;intergenic	flat	flat	flat	concordant	marked	marked	marked	presence
PEAK001150	chr2L:17384611-17384729	core-promoter	exon;intergenic	flat	flat	flat	concordant	not_marked	marked	marked	presence
PEAK001151	chr2L:17389034-17389448	distal	exon;intron	flat	flat	flat	concordant	not_marked	not_marked	marked	presence
PEAK001152	chr2L:1740047-1740373	distal	intron	flat	flat	flat	concordant	not_marked	not_marked	not_marked	absence
PEAK001153	chr2L:17410596-17410712	core-promoter	exon;intergenic	discordant	discordant	discordant	concordant	marked	marked	marked	presence
PEAK001154	chr2L:17427978-17428309	first-intron	exon;intron	discordant	flat	flat	concordant	not_marked	not_marked	marked	presence
PEAK001155	chr2L:17429690-17430122	core-promoter	exon;intron	flat	flat	flat	concordant	not_marked	not_marked	marked	presence
PEAK001156	chr2L:17430364-17430622	first-intron	intron	flat	flat	flat	concordant	not_marked	marked	marked	presence
PEAK001157	chr2L:17430847-17431338	first-intron	intron	iDRRE	flat	flat	concordant	not_marked	marked	not_marked	presence
PEAK001158	chr2L:17433310-17433409	proximal	intergenic	discordant	discordant	discordant	concordant	not_marked	not_marked	not_marked	absence
PEAK001159	chr2L:1744574-1745167	distal	exon;intron	flat	flat	iDRRE	concordant	marked	marked	not_marked	presence
PEAK001160	chr2L:17449599-17449936	first-intron	exon;intron	flat	flat	flat	concordant	not_marked	marked	marked	presence
PEAK001161	chr2L:17450197-17450684	core-promoter	exon;intergenic	iDRRE	flat	flat	concordant	not_marked	marked	marked	presence
PEAK001162	chr2L:17451048-17451209	proximal	exon	iDRRE	flat	iDRRE	concordant	not_marked	marked	marked	presence
PEAK001163	chr2L:17471753-17471998	first-intron	exon;intron	discordant	discordant	discordant	concordant	marked	marked	higher_signal	presence
PEAK001164	chr2L:17472506-17472936	first-intron	exon	flat	flat	flat	concordant	marked	marked	marked	presence
PEAK001165	chr2L:17473085-17473320	core-promoter	exon;intron	iDRRE	flat	flat	concordant	marked	marked	marked	presence
PEAK001166	chr2L:1747593-1747937	distal	exon;intron	discordant	iDRRE	iDRRE	concordant	not_marked	marked	not_marked	presence
PEAK001167	chr2L:17477782-17477984	core-promoter	exon;intergenic	iDRRE	flat	flat	concordant	not_marked	marked	not_marked	presence
PEAK001168	chr2L:1748465-1748938	distal	exon;intron	flat	flat	flat	concordant	not_marked	marked	not_marked	presence
PEAK001169	chr2L:17492238-17492421	first-intron	exon;intron	discordant	flat	flat	concordant	marked	marked	marked	presence
PEAK001170	chr2L:17497172-17497395	core-promoter	exon	discordant	flat	iDRRE	concordant	not_marked	marked	not_marked	presence
PEAK001171	chr2L:17501060-17501238	core-promoter	exon;intergenic	iDRRE	flat	flat	concordant	marked	marked	marked	presence
PEAK001172	chr2L:17603324-17603555	distal	exon	iDRRE	lower_peak	iDRRE	concordant	not_marked	not_marked	not_marked	absence
PEAK001173	chr2L:17621254-17621557	distal	intergenic	iDRRE	lower_peak	iDRRE	concordant	not_marked	not_marked	not_marked	absence
PEAK001174	chr2L:17687857-17688026	distal	intron	iDRRE	flat	flat	concordant	marked	higher_signal	not_marked	presence
PEAK001175	chr2L:17690452-17690599	distal	intron	flat	iDRRE	iDRRE	concordant	not_marked	not_marked	not_marked	absence
PEAK001176	chr2L:17702265-17702529	distal	intron	iDRRE	lower_peak	iDRRE	concordant	higher_signal	not_marked	not_marked	presence
PEAK001177	chr2L:17702678-17702899	proximal	intron	flat	flat	iDRRE	concordant	not_marked	not_marked	not_marked	absence
PEAK001178	chr2L:17715442-17715746	distal	exon;intron	iDRRE	lower_peak	iDRRE	concordant	not_marked	not_marked	not_marked	absence
PEAK001179	chr2L:17715872-17716135	distal	exon;intron	flat	flat	iDRRE	concordant	not_marked	not_marked	not_marked	absence
PEAK001180	chr2L:17734726-17734915	distal	intron	iDRRE	iDRRE	iDRRE	concordant	not_marked	not_marked	not_marked	absence
PEAK001181	chr2L:17743025-17743273	distal	intron	iDRRE	discordant	discordant	concordant	not_marked	not_marked	not_marked	absence
PEAK001182	chr2L:17743559-17744159	distal	intron	flat	flat	flat	concordant	not_marked	not_marked	not_marked	absence
PEAK001183	chr2L:17744547-17744707	distal	intron	discordant	discordant	discordant	concordant	not_marked	not_marked	not_marked	absence
PEAK001184	chr2L:17747546-17747699	distal	intron	discordant	discordant	discordant	concordant	not_marked	marked	not_marked	presence
PEAK001185	chr2L:17748758-17749100	distal	intron	flat	flat	iDRRE	concordant	not_marked	not_marked	not_marked	absence
PEAK001186	chr2L:17749737-17750286	distal	intron	flat	flat	flat	concordant	marked	marked	not_marked	presence
PEAK001187	chr2L:17755596-17755837	distal	intron	flat	discordant	discordant	concordant	not_marked	not_marked	not_marked	absence
PEAK001188	chr2L:17756785-17756975	distal	intron	iDRRE	discordant	no_peak	concordant	not_marked	not_marked	not_marked	absence
PEAK001189	chr2L:17757209-17757454	distal	intron	flat	lower_peak	discordant	concordant	not_marked	not_marked	not_marked	absence
PEAK001190	chr2L:17760676-17760798	distal	intron	discordant	discordant	no_peak	concordant	not_marked	not_marked	not_marked	absence
PEAK001191	chr2L:17763200-17763446	distal	intron	flat	discordant	flat	concordant	not_marked	not_marked	marked	presence
PEAK001192	chr2L:17763724-17764088	distal	intron	flat	flat	discordant	concordant	not_marked	not_marked	marked	presence
PEAK001193	chr2L:17768526-17768751	distal	intron	flat	flat	flat	concordant	not_marked	not_marked	higher_signal	presence
PEAK001194	chr2L:17768942-17769325	distal	intron	flat	flat	iDRRE	concordant	not_marked	not_marked	higher_signal	presence
PEAK001195	chr2L:17771282-17771742	distal	intron	flat	flat	iDRRE	concordant	not_marked	not_marked	not_marked	absence
PEAK001196	chr2L:17772176-17772455	distal	intron	flat	lower_peak	flat	concordant	not_marked	marked	not_marked	presence
PEAK001197	chr2L:17778324-17778590	core-promoter	exon;intergenic	flat	iDRRE	iDRRE	concordant	not_marked	not_marked	marked	presence
PEAK001198	chr2L:17779253-17779568	proximal	intergenic	flat	flat	iDRRE	concordant	not_marked	not_marked	not_marked	absence
PEAK001199	chr2L:17781598-17782015	distal	intergenic	flat	flat	flat	concordant	not_marked	marked	marked	presence
PEAK001200	chr2L:17782253-17782475	distal	intergenic	discordant	discordant	higher_peak	concordant	not_marked	marked	marked	presence
PEAK001201	chr2L:17784742-17784929	distal	intergenic	flat	lower_peak	flat	concordant	not_marked	not_marked	not_marked	absence
PEAK001202	chr2L:17963175-17963466	core-promoter	exon;intron	iDRRE	flat	iDRRE	concordant	not_marked	marked	marked	presence
PEAK001203	chr2L:17883-18187	distal	exon;intron	iDRRE	flat	flat	concordant	not_marked	not_marked	not_marked	absence
PEAK001204	chr2L:18002005-18002548	proximal	intergenic	flat	flat	flat	concordant	not_marked	marked	not_marked	presence
PEAK001205	chr2L:18002859-18003143	core-promoter	exon;intergenic	flat	flat	flat	concordant	marked	marked	marked	presence
PEAK001206	chr2L:18003312-18003596	core-promoter	exon;intergenic	flat	flat	flat	concordant	marked	marked	marked	presence
PEAK001207	chr2L:18003731-18004059	proximal	intergenic	flat	flat	iDRRE	concordant	marked	marked	marked	presence
PEAK001208	chr2L:18012155-18012791	core-promoter	exon;intergenic	flat	flat	flat	concordant	not_marked	marked	marked	presence
PEAK001209	chr2L:18013922-18014218	first-intron	intron	flat	flat	flat	concordant	not_marked	not_marked	not_marked	absence
PEAK001210	chr2L:18015713-18015992	first-intron	intron	iDRRE	iDRRE	iDRRE	concordant	not_marked	not_marked	not_marked	absence
PEAK001211	chr2L:18016927-18017122	first-intron	intron	discordant	discordant	discordant	concordant	not_marked	marked	not_marked	presence
PEAK001212	chr2L:1805824-1806142	distal	intergenic	iDRRE	iDRRE	flat	concordant	not_marked	not_marked	not_marked	absence
PEAK001213	chr2L:18065066-18065412	distal	exon;intron	flat	discordant	flat	concordant	higher_signal	not_marked	not_marked	presence
PEAK001214	chr2L:18114381-18114935	core-promoter	exon;intergenic	iDRRE	flat	iDRRE	concordant	not_marked	marked	not_marked	presence
PEAK001215	chr2L:18121291-18121716	first-intron	intron	flat	flat	flat	concordant	not_marked	not_marked	not_marked	absence
PEAK001216	chr2L:18121868-18122101	first-intron	intron	flat	flat	flat	concordant	marked	not_marked	not_marked	presence
PEAK001217	chr2L:18122345-18122596	first-intron	exon;intron	flat	flat	flat	concordant	marked	not_marked	not_marked	presence
PEAK001218	chr2L:18123559-18123889	proximal	exon	flat	iDRRE	flat	concordant	marked	marked	marked	presence
PEAK001219	chr2L:18137962-18138150	core-promoter	exon;intergenic	flat	flat	flat	concordant	marked	marked	marked	presence
PEAK001220	chr2L:18141686-18142070	distal	exon;intron	iDRRE	flat	flat	concordant	marked	marked	marked	presence
PEAK001221	chr2L:18145207-18146014	first-intron	exon;intron	flat	flat	flat	concordant	marked	marked	marked	presence
PEAK001222	chr2L:18150357-18150811	first-intron	intron	flat	iDRRE	flat	concordant	not_marked	marked	marked	presence
PEAK001223	chr2L:18151265-18151792	first-intron	intron	flat	flat	flat	concordant	marked	marked	marked	presence
PEAK001224	chr2L:18152298-18152682	core-promoter	exon;intergenic	flat	flat	flat	concordant	not_marked	marked	marked	presence
PEAK001225	chr2L:18158627-18158772	proximal	exon	iDRRE	lower_peak	iDRRE	concordant	not_marked	marked	marked	presence
PEAK001226	chr2L:182699-183198	distal	exon;intron	flat	iDRRE	flat	concordant	not_marked	not_marked	higher_signal	presence
PEAK001227	chr2L:18298126-18298261	distal	intergenic	iDRRE	flat	flat	concordant	not_marked	not_marked	not_marked	absence
PEAK001228	chr2L:18298451-18298584	distal	intergenic	discordant	discordant	no_peak	concordant	marked	marked	not_marked	presence
PEAK001229	chr2L:18302838-18303211	distal	intergenic	flat	flat	flat	concordant	not_marked	not_marked	not_marked	absence
PEAK001230	chr2L:18303501-18303708	distal	intergenic	flat	flat	discordant	concordant	not_marked	not_marked	not_marked	absence
PEAK001231	chr2L:18310734-18311345	core-promoter	exon;intergenic	flat	flat	flat	concordant	marked	marked	marked	presence
PEAK001232	chr2L:18311760-18312347	proximal	intergenic	flat	flat	flat	concordant	not_marked	marked	marked	presence
PEAK001233	chr2L:18312603-18313217	proximal	intergenic	flat	flat	flat	concordant	marked	marked	not_marked	presence
PEAK001234	chr2L:18313761-18314357	core-promoter	exon;intergenic	iDRRE	flat	flat	concordant	not_marked	not_marked	not_marked	absence
PEAK001235	chr2L:18319839-18320317	core-promoter	exon;intergenic	iDRRE	iDRRE	flat	concordant	marked	marked	marked	presence
PEAK001236	chr2L:18320590-18320952	first-intron	exon;intron	discordant	discordant	flat	concordant	marked	marked	marked	presence
PEAK001237	chr2L:18324062-18324196	first-intron	intron	discordant	discordant	flat	concordant	not_marked	not_marked	not_marked	absence
PEAK001238	chr2L:18327049-18327406	first-intron	intron	flat	flat	flat	concordant	not_marked	not_marked	not_marked	absence
PEAK001239	chr2L:18327912-18328077	first-intron	intron	discordant	discordant	discordant	concordant	not_marked	not_marked	not_marked	absence
PEAK001240	chr2L:18328580-18328732	first-intron	intron	discordant	flat	discordant	concordant	not_marked	not_marked	not_marked	absence
PEAK001241	chr2L:18336390-18336898	first-intron	intron	flat	flat	flat	concordant	not_marked	marked	not_marked	presence
PEAK001242	chr2L:18345499-18345928	first-intron	intron	iDRRE	flat	flat	concordant	not_marked	not_marked	not_marked	absence
PEAK001243	chr2L:18351545-18351949	first-intron	intron	flat	iDRRE	flat	concordant	not_marked	marked	not_marked	presence
PEAK001244	chr2L:18352511-18352843	first-intron	intron	flat	flat	flat	concordant	marked	marked	not_marked	presence
PEAK001245	chr2L:18353122-18353265	first-intron	intron	flat	flat	discordant	concordant	marked	marked	not_marked	presence
PEAK001246	chr2L:18355415-18355628	first-intron	intron	discordant	flat	flat	concordant	not_marked	not_marked	not_marked	absence
PEAK001247	chr2L:18372003-18372169	first-intron	intron	flat	discordant	iDRRE	concordant	not_marked	not_marked	not_marked	absence
PEAK001248	chr2L:18372322-18372525	first-intron	intron	discordant	discordant	flat	concordant	not_marked	not_marked	not_marked	absence
PEAK001249	chr2L:18376967-18377281	first-intron	intron	iDRRE	flat	flat	concordant	not_marked	not_marked	not_marked	absence
PEAK001250	chr2L:18377427-18377625	first-intron	intron	discordant	lower_peak	discordant	concordant	not_marked	not_marked	not_marked	absence
PEAK001251	chr2L:18394836-18395003	distal	intergenic	discordant	discordant	flat	concordant	not_marked	higher_signal	not_marked	presence
PEAK001252	chr2L:18443179-18443353	core-promoter	exon;intergenic	discordant	flat	lower_peak	concordant	marked	marked	marked	presence
PEAK001253	chr2L:18443468-18443592	proximal	intergenic	discordant	iDRRE	discordant	concordant	marked	marked	marked	presence
PEAK001254	chr2L:18444617-18445254	proximal	exon	flat	iDRRE	flat	concordant	not_marked	not_marked	not_marked	absence
PEAK001255	chr2L:18448901-18449037	core-promoter	intergenic;exon	discordant	flat	flat	concordant	marked	marked	marked	presence
PEAK001256	chr2L:18454541-18454742	core-promoter	exon;intergenic	iDRRE	flat	flat	concordant	marked	marked	marked	presence
PEAK001257	chr2L:18455476-18455871	core-promoter	exon;intergenic	flat	flat	flat	concordant	marked	marked	marked	presence
PEAK001258	chr2L:18456058-18456423	first-intron	intron	iDRRE	flat	flat	concordant	marked	marked	marked	presence
PEAK001259	chr2L:18457017-18457247	first-intron	intron	iDRRE	flat	flat	concordant	not_marked	not_marked	not_marked	absence
PEAK001260	chr2L:18458661-18459016	first-intron	intron	flat	iDRRE	flat	concordant	not_marked	not_marked	not_marked	absence
PEAK001261	chr2L:18463870-18464114	first-intron	intron	iDRRE	flat	flat	concordant	not_marked	marked	marked	presence
PEAK001262	chr2L:18464214-18464507	first-intron	intron	iDRRE	flat	flat	concordant	not_marked	marked	marked	presence
PEAK001263	chr2L:18465786-18466212	first-intron	intron	flat	iDRRE	flat	concordant	marked	marked	marked	presence
PEAK001264	chr2L:18466697-18467091	first-intron	intron	flat	flat	flat	concordant	not_marked	marked	not_marked	presence
PEAK001265	chr2L:18467476-18467821	first-intron	intron	flat	flat	flat	concordant	not_marked	marked	not_marked	presence
PEAK001266	chr2L:18468273-18469070	first-intron	intron	flat	flat	flat	concordant	not_marked	marked	marked	presence
PEAK001267	chr2L:18469739-18470015	first-intron	intron	iDRRE	flat	flat	concordant	marked	marked	marked	presence
PEAK001268	chr2L:18477208-18477375	first-intron	intron	discordant	no_peak	no_peak	concordant	not_marked	not_marked	not_marked	absence
PEAK001269	chr2L:18479675-18479840	first-intron	intron	discordant	discordant	discordant	concordant	not_marked	marked	not_marked	presence
PEAK001270	chr2L:18480695-18480920	first-intron	intron	flat	flat	flat	concordant	not_marked	marked	not_marked	presence
PEAK001271	chr2L:18481781-18482191	first-intron	intron	flat	iDRRE	flat	concordant	marked	marked	not_marked	presence
PEAK001272	chr2L:18483920-18484024	proximal	exon	discordant	flat	discordant	concordant	not_marked	marked	marked	presence
PEAK001273	chr2L:18484293-18484597	core-promoter	exon;intergenic	iDRRE	flat	flat	concordant	not_marked	marked	marked	presence
PEAK001274	chr2L:18485208-18485492	core-promoter	exon;intergenic	flat	flat	flat	concordant	not_marked	marked	marked	presence
PEAK001275	chr2L:18485644-18485867	proximal	exon	iDRRE	flat	flat	concordant	not_marked	marked	marked	presence
PEAK001276	chr2L:18500337-18500597	distal	intron	discordant	iDRRE	flat	concordant	not_marked	marked	not_marked	presence
PEAK001277	chr2L:18503944-18504272	core-promoter	exon;intergenic	iDRRE	flat	iDRRE	concordant	marked	marked	marked	presence
PEAK001278	chr2L:18516680-18517043	proximal	intergenic	flat	flat	flat	concordant	not_marked	marked	marked	presence
PEAK001279	chr2L:18517162-18517875	core-promoter	exon;intergenic	iDRRE	flat	flat	concordant	not_marked	marked	marked	presence
PEAK001280	chr2L:18521008-18521394	first-intron	intron	iDRRE	lower_peak	flat	concordant	not_marked	not_marked	not_marked	absence
PEAK001281	chr2L:18523303-18523677	first-intron	exon	iDRRE	flat	flat	concordant	not_marked	not_marked	not_marked	absence
PEAK001282	chr2L:18550-18711	distal	exon;intron	iDRRE	lower_peak	flat	concordant	not_marked	not_marked	not_marked	absence
PEAK001283	chr2L:18561727-18562101	distal	intron	iDRRE	flat	iDRRE	concordant	not_marked	marked	not_marked	presence
PEAK001284	chr2L:18562476-18562665	distal	intron	iDRRE	flat	flat	concordant	not_marked	marked	marked	presence
PEAK001285	chr2L:18562844-18562963	distal	exon	discordant	discordant	flat	concordant	not_marked	marked	marked	presence
PEAK001286	chr2L:18563113-18563448	distal	intron;exon	flat	iDRRE	flat	concordant	not_marked	marked	marked	presence
PEAK001287	chr2L:18563985-18564303	distal	intron	iDRRE	flat	flat	concordant	not_marked	not_marked	higher_signal	presence
PEAK001288	chr2L:18571708-18572027	distal	exon	flat	flat	flat	concordant	marked	marked	marked	presence
PEAK001289	chr2L:18572078-18572424	distal	exon;intron	iDRRE	flat	flat	concordant	marked	marked	marked	presence
PEAK001290	chr2L:18572705-18573173	distal	intron	iDRRE	iDRRE	flat	concordant	marked	marked	marked	presence
PEAK001291	chr2L:18576386-18576494	distal	intron	discordant	lower_peak	higher_peak	concordant	not_marked	higher_signal	not_marked	presence
PEAK001292	chr2L:18604717-18605066	proximal	exon	iDRRE	discordant	discordant	concordant	not_marked	marked	marked	presence
PEAK001293	chr2L:18605199-18605349	core-promoter	exon;intergenic	iDRRE	flat	flat	concordant	not_marked	marked	marked	presence
PEAK001294	chr2L:18606741-18606862	core-promoter	exon;intergenic	discordant	discordant	flat	concordant	marked	marked	marked	presence
PEAK001295	chr2L:18612225-18612335	core-promoter	intergenic;exon	discordant	discordant	flat	concordant	not_marked	marked	not_marked	presence
PEAK001296	chr2L:18617120-18617399	core-promoter	exon;intergenic	flat	iDRRE	flat	concordant	not_marked	not_marked	marked	presence
PEAK001297	chr2L:18622014-18622267	first-intron	intron	iDRRE	discordant	discordant	concordant	not_marked	higher_signal	not_marked	presence
PEAK001298	chr2L:18627910-18628237	first-intron	intron	flat	flat	flat	concordant	marked	marked	not_marked	presence
PEAK001299	chr2L:18628425-18628635	first-intron	intron	iDRRE	discordant	flat	concordant	marked	marked	not_marked	presence
PEAK001300	chr2L:18629314-18629502	first-intron	intron	iDRRE	iDRRE	flat	concordant	not_marked	marked	not_marked	presence
PEAK001301	chr2L:18631042-18631401	first-intron	intron	flat	flat	flat	concordant	not_marked	marked	not_marked	presence
PEAK001302	chr2L:18640517-18641129	distal	intron	flat	flat	flat	concordant	not_marked	marked	not_marked	presence
PEAK001303	chr2L:18645733-18646049	distal	intron	flat	flat	iDRRE	concordant	not_marked	marked	not_marked	presence
PEAK001304	chr2L:18647955-18648374	distal	intron	iDRRE	iDRRE	flat	concordant	not_marked	not_marked	not_marked	absence
PEAK001305	chr2L:18652807-18653447	core-promoter	exon;intron	iDRRE	flat	flat	concordant	not_marked	marked	marked	presence
PEAK001306	chr2L:18654574-18654855	proximal	intron	flat	iDRRE	flat	concordant	not_marked	marked	not_marked	presence
PEAK001307	chr2L:18663112-18663437	proximal	intergenic	flat	flat	flat	concordant	not_marked	marked	not_marked	presence
PEAK001308	chr2L:18664696-18665131	core-promoter	intergenic	flat	flat	flat	concordant	not_marked	marked	marked	presence
PEAK001309	chr2L:18665344-18665606	proximal	exon	flat	iDRRE	flat	concordant	not_marked	marked	marked	presence
PEAK001310	chr2L:18666047-18666223	first-intron	intron	iDRRE	discordant	iDRRE	concordant	not_marked	marked	not_marked	presence
PEAK001311	chr2L:18677107-18677232	core-promoter	exon;intergenic	discordant	discordant	discordant	concordant	not_marked	marked	not_marked	presence
PEAK001312	chr2L:18677418-18677719	first-intron	exon;intron	iDRRE	flat	flat	concordant	not_marked	marked	not_marked	presence
PEAK001313	chr2L:18682019-18682132	core-promoter	exon;intron	discordant	discordant	flat	concordant	marked	marked	marked	presence
PEAK001314	chr2L:18688752-18688963	core-promoter	exon;intergenic	iDRRE	flat	flat	concordant	marked	marked	marked	presence
PEAK001315	chr2L:18694029-18694264	first-intron	intron	flat	flat	flat	concordant	not_marked	not_marked	not_marked	absence
PEAK001316	chr2L:18695376-18695527	core-promoter	exon	iDRRE	flat	flat	concordant	not_marked	marked	marked	presence
PEAK001317	chr2L:18698655-18698764	core-promoter	exon;intergenic	flat	flat	flat	concordant	not_marked	not_marked	not_marked	absence
PEAK001318	chr2L:18703014-18703180	core-promoter	exon;intergenic	iDRRE	discordant	flat	concordant	marked	marked	marked	presence
PEAK001319	chr2L:18703337-18703459	core-promoter	intergenic	discordant	flat	flat	concordant	marked	marked	marked	presence
PEAK001320	chr2L:18707992-18708145	first-intron	exon;intron	discordant	flat	flat	concordant	not_marked	marked	marked	presence
PEAK001321	chr2L:18708222-18708447	proximal	exon	iDRRE	iDRRE	flat	concordant	not_marked	marked	marked	presence
PEAK001322	chr2L:18708529-18708628	core-promoter	exon	discordant	discordant	discordant	concordant	not_marked	marked	marked	presence
PEAK001323	chr2L:18708780-18708879	core-promoter	exon;intergenic	flat	discordant	flat	concordant	not_marked	marked	marked	presence
PEAK001324	chr2L:18709053-18709136	first-intron	exon;intron	discordant	discordant	discordant	concordant	not_marked	marked	marked	presence
PEAK001325	chr2L:18718955-18719620	first-intron	intron	flat	flat	flat	concordant	not_marked	marked	not_marked	presence
PEAK001326	chr2L:18721021-18721419	first-intron	intron	discordant	discordant	flat	concordant	not_marked	not_marked	marked	presence
PEAK001327	chr2L:18732636-18733266	proximal	exon	flat	flat	flat	concordant	marked	marked	marked	presence
PEAK001328	chr2L:18735575-18736079	core-promoter	exon;intergenic	iDRRE	flat	flat	concordant	marked	not_marked	higher_signal	presence
PEAK001329	chr2L:18737345-18737607	proximal	intergenic	flat	discordant	discordant	concordant	not_marked	not_marked	not_marked	absence
PEAK001330	chr2L:18741591-18742004	proximal	intergenic	iDRRE	flat	flat	concordant	marked	marked	marked	presence
PEAK001331	chr2L:18742929-18743769	distal	intergenic	iDRRE	iDRRE	flat	concordant	marked	marked	marked	presence
PEAK001332	chr2L:18753166-18753598	distal	intergenic	discordant	flat	flat	concordant	marked	not_marked	marked	presence
PEAK001333	chr2L:18757580-18758076	distal	intergenic	flat	iDRRE	flat	concordant	marked	not_marked	not_marked	presence
PEAK001334	chr2L:18766635-18766895	distal	intron	flat	flat	flat	concordant	not_marked	not_marked	not_marked	absence
PEAK001335	chr2L:18782913-18783102	distal	intron	iDRRE	flat	iDRRE	concordant	marked	not_marked	not_marked	presence
PEAK001336	chr2L:18783227-18783674	distal	intron	iDRRE	flat	flat	concordant	marked	not_marked	not_marked	presence
PEAK001337	chr2L:18794425-18794530	proximal	intergenic	discordant	flat	discordant	concordant	not_marked	not_marked	not_marked	absence
PEAK001338	chr2L:18795914-18796712	core-promoter	exon;intergenic	iDRRE	flat	flat	concordant	marked	not_marked	marked	presence
PEAK001339	chr2L:18799557-18799904	distal	intergenic	discordant	discordant	no_peak	concordant	not_marked	higher_signal	not_marked	presence
PEAK001340	chr2L:18805976-18806257	core-promoter	exon;intergenic	discordant	flat	iDRRE	concordant	not_marked	not_marked	not_marked	absence
PEAK001341	chr2L:18806812-18806999	proximal	intergenic	discordant	flat	discordant	concordant	not_marked	not_marked	not_marked	absence
PEAK001342	chr2L:18810926-18811352	core-promoter	exon;intergenic	flat	flat	flat	concordant	not_marked	marked	marked	presence
PEAK001343	chr2L:18823434-18823970	core-promoter	exon;intron;intergenic	iDRRE	flat	flat	concordant	marked	marked	marked	presence
PEAK001344	chr2L:18830553-18830750	proximal	exon	iDRRE	flat	discordant	concordant	marked	marked	marked	presence
PEAK001345	chr2L:18831107-18831378	core-promoter	exon;intergenic	iDRRE	flat	flat	concordant	not_marked	marked	marked	presence
PEAK001346	chr2L:18838950-18839218	proximal	exon	flat	flat	iDRRE	concordant	marked	marked	marked	presence
PEAK001347	chr2L:18839295-18839520	proximal	exon	iDRRE	flat	flat	concordant	marked	marked	marked	presence
PEAK001348	chr2L:18839596-18839849	core-promoter	exon	flat	flat	flat	concordant	not_marked	marked	marked	presence
PEAK001349	chr2L:1884422-1884806	core-promoter	exon;intergenic	iDRRE	flat	flat	concordant	marked	marked	marked	presence
PEAK001350	chr2L:1884995-1885256	proximal	exon	flat	flat	flat	concordant	marked	marked	marked	presence
PEAK001351	chr2L:18859209-18859433	core-promoter	exon;intergenic	iDRRE	flat	flat	concordant	not_marked	marked	not_marked	presence
PEAK001352	chr2L:18866618-18866980	first-intron	intron	iDRRE	flat	flat	concordant	not_marked	not_marked	not_marked	absence
PEAK001353	chr2L:18869190-18869641	first-intron	intron	iDRRE	iDRRE	iDRRE	concordant	not_marked	higher_signal	not_marked	presence
PEAK001354	chr2L:1886972-1887185	first-intron	intron	flat	discordant	discordant	concordant	marked	marked	not_marked	presence
PEAK001355	chr2L:18871310-18871805	first-intron	intron	flat	iDRRE	flat	concordant	marked	marked	marked	presence
PEAK001356	chr2L:18872129-18872323	first-intron	intron	flat	discordant	flat	concordant	marked	marked	marked	presence
PEAK001357	chr2L:18874088-18874349	first-intron	intron	discordant	iDRRE	iDRRE	concordant	marked	marked	marked	presence
PEAK001358	chr2L:18875068-18875271	first-intron	intron	iDRRE	flat	discordant	concordant	marked	marked	not_marked	presence
PEAK001359	chr2L:1887478-1888287	first-intron	intron	flat	flat	flat	concordant	marked	marked	not_marked	presence
PEAK001360	chr2L:18881140-18881776	core-promoter	exon;intergenic	flat	iDRRE	flat	concordant	marked	marked	marked	presence
PEAK001361	chr2L:1888891-1889071	first-intron	intron	discordant	discordant	discordant	concordant	not_marked	not_marked	not_marked	absence
PEAK001362	chr2L:18890366-18890843	distal	intergenic	iDRRE	flat	flat	concordant	marked	marked	not_marked	presence
PEAK001363	chr2L:18894614-18895073	proximal	exon	flat	flat	flat	concordant	not_marked	marked	marked	presence
PEAK001364	chr2L:18895316-18895589	proximal	exon	iDRRE	discordant	higher_peak	concordant	not_marked	marked	marked	presence
PEAK001365	chr2L:18899071-18899347	proximal	intergenic	discordant	discordant	flat	concordant	marked	not_marked	not_marked	presence
PEAK001366	chr2L:18900728-18901034	proximal	intergenic	flat	discordant	flat	concordant	not_marked	marked	not_marked	presence
PEAK001367	chr2L:18907005-18907541	proximal	intergenic	flat	iDRRE	flat	concordant	marked	marked	marked	presence
PEAK001368	chr2L:18927254-18927501	distal	intron	discordant	no_peak	no_peak	concordant	not_marked	not_marked	not_marked	absence
PEAK001369	chr2L:18936175-18936463	distal	exon;intron	iDRRE	flat	flat	concordant	marked	not_marked	marked	presence
PEAK001370	chr2L:18944262-18945000	proximal	intergenic	flat	iDRRE	flat	concordant	marked	marked	marked	presence
PEAK001371	chr2L:18945807-18946215	core-promoter	exon;intergenic	flat	flat	flat	concordant	not_marked	marked	higher_signal	presence
PEAK001372	chr2L:18946615-18947005	proximal	exon	flat	flat	flat	concordant	not_marked	marked	marked	presence
PEAK001373	chr2L:18947274-18948111	proximal	intergenic	flat	flat	flat	concordant	marked	not_marked	marked	presence
PEAK001374	chr2L:18948356-18948550	proximal	intergenic	iDRRE	discordant	discordant	concordant	not_marked	not_marked	higher_signal	presence
PEAK001375	chr2L:18951807-18951909	core-promoter	exon;intergenic	discordant	discordant	discordant	concordant	not_marked	marked	not_marked	presence
PEAK001376	chr2L:18968666-18968815	core-promoter	exon;intergenic	flat	flat	flat	concordant	not_marked	marked	marked	presence
PEAK001377	chr2L:18974284-18974404	core-promoter	exon	no_peak	discordant	discordant	concordant	marked	marked	marked	presence
PEAK001378	chr2L:18974599-18974726	core-promoter	exon;intergenic	discordant	lower_peak	flat	concordant	marked	marked	marked	presence
PEAK001379	chr2L:18984415-18984586	first-intron	intron	discordant	discordant	discordant	concordant	not_marked	not_marked	not_marked	absence
PEAK001380	chr2L:18987159-18987429	core-promoter	exon;intergenic	flat	flat	flat	concordant	marked	marked	marked	presence
PEAK001381	chr2L:19003157-19003442	core-promoter	exon;intergenic	iDRRE	flat	flat	concordant	not_marked	marked	marked	presence
PEAK001382	chr2L:19009168-19009515	core-promoter	exon;intron;intergenic	iDRRE	iDRRE	flat	concordant	marked	marked	marked	presence
PEAK001383	chr2L:1901323-1901600	first-intron	intron	iDRRE	flat	flat	concordant	not_marked	not_marked	not_marked	absence
PEAK001384	chr2L:19021499-19021899	proximal	intergenic	flat	flat	flat	concordant	marked	marked	not_marked	presence
PEAK001385	chr2L:19022079-19022243	proximal	intergenic	iDRRE	flat	flat	concordant	marked	marked	higher_signal	presence
PEAK001386	chr2L:1902989-1903259	first-intron	intron	flat	flat	iDRRE	concordant	marked	not_marked	not_marked	presence
PEAK001387	chr2L:19034566-19034694	core-promoter	exon	iDRRE	lower_peak	flat	concordant	not_marked	marked	not_marked	presence
PEAK001388	chr2L:19035041-19035432	first-intron	intron	iDRRE	flat	flat	concordant	marked	marked	not_marked	presence
PEAK001389	chr2L:19045296-19045442	core-promoter	exon;intergenic	iDRRE	flat	flat	concordant	marked	marked	marked	presence
PEAK001390	chr2L:19049035-19049135	core-promoter	exon;intergenic	discordant	discordant	flat	concordant	not_marked	marked	not_marked	presence
PEAK001391	chr2L:19051826-19051987	core-promoter	exon	iDRRE	lower_peak	iDRRE	concordant	not_marked	marked	marked	presence
PEAK001392	chr2L:19054267-19054797	proximal	exon	flat	iDRRE	flat	concordant	marked	marked	marked	presence
PEAK001393	chr2L:19063214-19063327	core-promoter	exon;intergenic	flat	flat	flat	concordant	not_marked	marked	marked	presence
PEAK001394	chr2L:19064842-19065016	core-promoter	exon	iDRRE	lower_peak	iDRRE	concordant	marked	marked	marked	presence
PEAK001395	chr2L:19069727-19069967	core-promoter	exon;intergenic	flat	iDRRE	flat	concordant	marked	marked	marked	presence
PEAK001396	chr2L:1906939-1907123	first-intron	intron	flat	discordant	higher_peak	concordant	not_marked	not_marked	not_marked	absence
PEAK001397	chr2L:19070132-19070458	proximal	intergenic	iDRRE	iDRRE	flat	concordant	marked	marked	marked	presence
PEAK001398	chr2L:19072033-19072250	proximal	intron	iDRRE	discordant	flat	concordant	marked	marked	marked	presence
PEAK001399	chr2L:1907314-1907481	first-intron	intron	flat	discordant	flat	concordant	not_marked	not_marked	not_marked	absence
PEAK001400	chr2L:19079906-19080199	proximal	exon	iDRRE	discordant	flat	concordant	marked	not_marked	marked	presence
PEAK001401	chr2L:1909763-1910168	distal	exon;intron	flat	flat	flat	concordant	not_marked	not_marked	not_marked	absence
PEAK001402	chr2L:19111136-19111246	proximal	intron	flat	discordant	flat	concordant	not_marked	not_marked	not_marked	absence
PEAK001403	chr2L:19111718-19112515	proximal	exon;intron	flat	iDRRE	flat	concordant	marked	marked	marked	presence
PEAK001404	chr2L:19114273-19114434	core-promoter	exon;intergenic	iDRRE	flat	flat	concordant	marked	marked	marked	presence
PEAK001405	chr2L:19120191-19120483	core-promoter	intergenic;exon	flat	iDRRE	flat	concordant	not_marked	not_marked	marked	presence
PEAK001406	chr2L:19120742-19121029	proximal	intergenic	flat	flat	flat	concordant	not_marked	not_marked	marked	presence
PEAK001407	chr2L:19126887-19127016	core-promoter	exon;intergenic	discordant	discordant	flat	concordant	marked	marked	not_marked	presence
PEAK001408	chr2L:19127153-19127328	core-promoter	exon;intergenic	discordant	flat	flat	concordant	marked	marked	not_marked	presence
PEAK001409	chr2L:19133468-19133562	proximal	exon;intron	discordant	discordant	discordant	concordant	not_marked	marked	marked	presence
PEAK001410	chr2L:19133761-19133878	core-promoter	exon;intron	discordant	flat	discordant	concordant	not_marked	marked	marked	presence
PEAK001411	chr2L:19134928-19135301	core-promoter	exon;intron	flat	flat	flat	concordant	not_marked	marked	marked	presence
PEAK001412	chr2L:1913484-1913626	distal	exon	discordant	discordant	flat	concordant	marked	not_marked	marked	presence
PEAK001413	chr2L:19135299-19135621	core-promoter	intron	discordant	lower_peak	flat	concordant	not_marked	marked	not_marked	presence
PEAK001414	chr2L:19135968-19136068	first-intron	intron	discordant	discordant	discordant	concordant	marked	marked	not_marked	presence
PEAK001415	chr2L:19136274-19136702	first-intron	intron	iDRRE	flat	flat	concordant	marked	not_marked	higher_signal	presence
PEAK001416	chr2L:19136936-19137188	first-intron	intron	flat	iDRRE	flat	concordant	marked	marked	higher_signal	presence
PEAK001417	chr2L:19140585-19140855	first-intron	intron	flat	discordant	discordant	concordant	not_marked	not_marked	not_marked	absence
PEAK001418	chr2L:19141525-19141719	first-intron	intron	flat	flat	flat	concordant	marked	marked	higher_signal	presence
PEAK001419	chr2L:19142171-19142575	first-intron	intron	flat	flat	lower_peak	concordant	marked	marked	not_marked	presence
PEAK001420	chr2L:19143737-19144246	first-intron	intron	iDRRE	iDRRE	flat	concordant	not_marked	marked	marked	presence
PEAK001421	chr2L:19144420-19144591	first-intron	intron	iDRRE	flat	flat	concordant	not_marked	marked	marked	presence
PEAK001422	chr2L:19146053-19146314	distal	intron	iDRRE	iDRRE	flat	concordant	not_marked	marked	not_marked	presence
PEAK001423	chr2L:19154828-19155332	distal	intron	iDRRE	iDRRE	flat	concordant	marked	marked	not_marked	presence
PEAK001424	chr2L:19156208-19156477	distal	intron	flat	iDRRE	flat	concordant	not_marked	marked	not_marked	presence
PEAK001425	chr2L:19156802-19157180	distal	intron	iDRRE	flat	lower_peak	concordant	not_marked	marked	not_marked	presence
PEAK001426	chr2L:19157965-19158647	proximal	exon	iDRRE	flat	flat	concordant	not_marked	marked	marked	presence
PEAK001427	chr2L:19161323-19161938	distal	intron	iDRRE	flat	flat	concordant	not_marked	not_marked	marked	presence
PEAK001428	chr2L:19162439-19162820	distal	intron	flat	flat	flat	concordant	not_marked	marked	marked	presence
PEAK001429	chr2L:19181566-19181809	core-promoter	exon;intergenic	iDRRE	discordant	discordant	concordant	not_marked	marked	not_marked	presence
PEAK001430	chr2L:19185987-19186072	core-promoter	exon;intergenic	discordant	discordant	flat	concordant	marked	marked	not_marked	presence
PEAK001431	chr2L:19190122-19190409	core-promoter	exon;intergenic	flat	flat	flat	concordant	not_marked	marked	marked	presence
PEAK001432	chr2L:19199450-19200039	first-intron	intron	flat	flat	flat	concordant	marked	marked	higher_signal	presence
PEAK001433	chr2L:19201380-19202016	first-intron	intron	flat	flat	flat	concordant	marked	marked	marked	presence
PEAK001434	chr2L:19202630-19202946	first-intron	intron	discordant	discordant	flat	concordant	not_marked	marked	marked	presence
PEAK001435	chr2L:19213636-19213857	proximal	intergenic	flat	iDRRE	flat	concordant	marked	marked	marked	presence
PEAK001436	chr2L:19215214-19215876	core-promoter	exon;intron;intergenic	flat	flat	flat	concordant	not_marked	marked	not_marked	presence
PEAK001437	chr2L:19216098-19216410	proximal	intergenic	flat	iDRRE	flat	concordant	not_marked	marked	not_marked	presence
PEAK001438	chr2L:19225753-19226454	distal	intergenic	flat	flat	flat	concordant	marked	marked	marked	presence
PEAK001439	chr2L:19226624-19226980	distal	intergenic	flat	flat	flat	concordant	marked	marked	not_marked	presence
PEAK001440	chr2L:19229435-19229644	distal	intergenic	flat	discordant	discordant	concordant	not_marked	marked	not_marked	presence
PEAK001441	chr2L:19229914-19230509	distal	intergenic	flat	flat	flat	concordant	not_marked	marked	not_marked	presence
PEAK001442	chr2L:19244325-19244751	distal	intergenic	flat	flat	iDRRE	concordant	not_marked	marked	not_marked	presence
PEAK001443	chr2L:19244835-19245249	distal	intergenic	discordant	discordant	flat	concordant	not_marked	marked	not_marked	presence
PEAK001444	chr2L:19252708-19252848	distal	intergenic	higher_peak	flat	discordant	concordant	not_marked	not_marked	higher_signal	presence
PEAK001445	chr2L:1926451-1926658	distal	intron	iDRRE	flat	discordant	concordant	not_marked	not_marked	higher_signal	presence
PEAK001446	chr2L:19274738-19274932	proximal	intergenic	discordant	discordant	discordant	concordant	marked	marked	not_marked	presence
PEAK001447	chr2L:19305229-19305502	distal	intergenic	discordant	discordant	discordant	concordant	not_marked	not_marked	not_marked	absence
PEAK001448	chr2L:19313420-19313789	distal	intergenic	iDRRE	flat	flat	concordant	not_marked	marked	not_marked	presence
PEAK001449	chr2L:19314353-19314581	distal	intergenic	flat	iDRRE	iDRRE	concordant	not_marked	marked	not_marked	presence
PEAK001450	chr2L:19321816-19322422	proximal	intergenic	flat	flat	flat	concordant	marked	marked	marked	presence
PEAK001451	chr2L:19323308-19323885	proximal	exon	flat	iDRRE	flat	concordant	marked	marked	marked	presence
PEAK001452	chr2L:19328869-19329085	proximal	intergenic	discordant	iDRRE	flat	concordant	marked	marked	higher_signal	presence
PEAK001453	chr2L:19329198-19329876	proximal	intergenic	iDRRE	iDRRE	flat	concordant	marked	marked	higher_signal	presence
PEAK001454	chr2L:19341290-19341858	first-intron	intron	flat	flat	iDRRE	concordant	marked	marked	not_marked	presence
PEAK001455	chr2L:19342341-19342882	first-intron	intron	discordant	discordant	discordant	concordant	marked	marked	marked	presence
PEAK001456	chr2L:19343082-19343348	first-intron	intron	discordant	flat	iDRRE	concordant	marked	marked	marked	presence
PEAK001457	chr2L:19359770-19360205	first-intron	intron	iDRRE	flat	flat	concordant	not_marked	marked	not_marked	presence
PEAK001458	chr2L:19360802-19361003	first-intron	intron	iDRRE	iDRRE	flat	concordant	not_marked	marked	not_marked	presence
PEAK001459	chr2L:19361310-19361710	first-intron	intron	flat	flat	flat	concordant	not_marked	marked	not_marked	presence
PEAK001460	chr2L:19361860-19362213	first-intron	intron	iDRRE	iDRRE	flat	concordant	not_marked	marked	not_marked	presence
PEAK001461	chr2L:19362840-19363002	proximal	exon	discordant	discordant	flat	concordant	not_marked	marked	marked	presence
PEAK001462	chr2L:19363165-19363333	core-promoter	exon;intergenic	iDRRE	flat	flat	concordant	not_marked	marked	marked	presence
PEAK001463	chr2L:19363666-19363902	proximal	intergenic	iDRRE	flat	flat	concordant	not_marked	not_marked	not_marked	absence
PEAK001464	chr2L:19378715-19379019	proximal	intergenic	iDRRE	flat	flat	concordant	not_marked	not_marked	not_marked	absence
PEAK001465	chr2L:1938111-1938418	core-promoter	exon;intron	flat	flat	flat	concordant	not_marked	not_marked	not_marked	absence
PEAK001466	chr2L:19389131-19389366	proximal	intron	iDRRE	flat	flat	concordant	not_marked	marked	not_marked	presence
PEAK001467	chr2L:19389757-19390196	core-promoter	exon;intron;intergenic	flat	flat	flat	concordant	not_marked	marked	marked	presence
PEAK001468	chr2L:19393829-19394012	first-intron	exon;intron	iDRRE	flat	flat	concordant	marked	not_marked	not_marked	presence
PEAK001469	chr2L:19397887-19398657	core-promoter	exon;intron;intergenic	flat	iDRRE	flat	concordant	not_marked	marked	marked	presence
PEAK001470	chr2L:19398886-19399225	proximal	intergenic	iDRRE	flat	flat	concordant	not_marked	marked	marked	presence
PEAK001471	chr2L:19413969-19414229	distal	intron	iDRRE	flat	iDRRE	concordant	not_marked	marked	marked	presence
PEAK001472	chr2L:19414331-19414641	distal	exon;intron	iDRRE	flat	flat	concordant	not_marked	marked	marked	presence
PEAK001473	chr2L:19419942-19420345	proximal	exon;intron	flat	discordant	discordant	concordant	marked	not_marked	not_marked	presence
PEAK001474	chr2L:19423436-19423674	first-intron	exon;intron	flat	iDRRE	flat	concordant	marked	not_marked	marked	presence
PEAK001475	chr2L:19424541-19424786	first-intron	exon	discordant	flat	flat	concordant	not_marked	not_marked	not_marked	absence
PEAK001476	chr2L:19425036-19425398	first-intron	intron	iDRRE	flat	discordant	concordant	not_marked	not_marked	not_marked	absence
PEAK001477	chr2L:19426209-19426793	core-promoter	exon	iDRRE	flat	flat	concordant	not_marked	marked	marked	presence
PEAK001478	chr2L:19432475-19432641	core-promoter	exon;intergenic	flat	flat	flat	concordant	marked	marked	marked	presence
PEAK001479	chr2L:19438783-19439128	distal	exon;intron	iDRRE	flat	flat	concordant	not_marked	marked	marked	presence
PEAK001480	chr2L:19439244-19439655	distal	intron	flat	iDRRE	flat	concordant	not_marked	marked	marked	presence
PEAK001481	chr2L:19444670-19444838	core-promoter	exon;intron	iDRRE	flat	flat	concordant	not_marked	marked	marked	presence
PEAK001482	chr2L:19444969-19445136	proximal	exon	iDRRE	iDRRE	flat	concordant	marked	marked	marked	presence
PEAK001483	chr2L:19452828-19452969	first-intron	intron	flat	iDRRE	flat	concordant	not_marked	marked	marked	presence
PEAK001484	chr2L:19453469-19453676	core-promoter	exon;intergenic	iDRRE	flat	flat	concordant	not_marked	marked	marked	presence
PEAK001485	chr2L:19454054-19454505	core-promoter	exon;intergenic	iDRRE	iDRRE	flat	concordant	not_marked	not_marked	not_marked	absence
PEAK001486	chr2L:19454687-19454913	first-intron	exon;intron	flat	lower_peak	flat	concordant	marked	not_marked	not_marked	presence
PEAK001487	chr2L:19463930-19464267	core-promoter	exon;intergenic	discordant	flat	flat	concordant	not_marked	marked	marked	presence
PEAK001488	chr2L:19484670-19484778	core-promoter	exon;intergenic	no_peak	flat	flat	concordant	marked	marked	marked	presence
PEAK001489	chr2L:19490053-19490188	core-promoter	exon;intergenic	iDRRE	flat	iDRRE	concordant	not_marked	marked	not_marked	presence
PEAK001490	chr2L:19493170-19493284	core-promoter	exon	iDRRE	flat	flat	concordant	not_marked	marked	marked	presence
PEAK001491	chr2L:19493456-19493602	first-intron	exon;intron	flat	flat	flat	concordant	not_marked	marked	marked	presence
PEAK001492	chr2L:19493-19696	proximal	intron	iDRRE	flat	flat	concordant	not_marked	not_marked	not_marked	absence
PEAK001493	chr2L:19498015-19498200	core-promoter	exon;intergenic	iDRRE	flat	flat	concordant	not_marked	marked	not_marked	presence
PEAK001494	chr2L:19508717-19508919	core-promoter	exon;intergenic	iDRRE	flat	flat	concordant	marked	marked	marked	presence
PEAK001495	chr2L:19517499-19517703	proximal	intergenic	iDRRE	flat	flat	concordant	not_marked	higher_signal	not_marked	presence
PEAK001496	chr2L:19519661-19519898	first-intron	intron	higher_peak	discordant	discordant	concordant	not_marked	not_marked	not_marked	absence
PEAK001497	chr2L:19530247-19530370	core-promoter	intron;exon	discordant	discordant	flat	concordant	marked	marked	not_marked	presence
PEAK001498	chr2L:19533390-19533568	core-promoter	exon;intergenic	flat	flat	flat	concordant	not_marked	marked	marked	presence
PEAK001499	chr2L:19537830-19538151	core-promoter	exon;intergenic	flat	iDRRE	flat	concordant	marked	marked	marked	presence
PEAK001500	chr2L:19542316-19542684	core-promoter	exon;intergenic	discordant	discordant	flat	concordant	not_marked	marked	not_marked	presence
PEAK001501	chr2L:19548240-19548548	core-promoter	exon;intergenic	iDRRE	iDRRE	flat	concordant	not_marked	not_marked	not_marked	absence
PEAK001502	chr2L:19549382-19549964	first-intron	exon;intron	flat	iDRRE	flat	concordant	not_marked	marked	marked	presence
PEAK001503	chr2L:19561048-19561362	distal	exon	flat	flat	lower_peak	concordant	not_marked	not_marked	not_marked	absence
PEAK001504	chr2L:19562524-19562686	proximal	exon;intron	discordant	discordant	discordant	concordant	not_marked	marked	not_marked	presence
PEAK001505	chr2L:19571567-19572210	distal	exon;intron	iDRRE	iDRRE	flat	concordant	not_marked	not_marked	marked	presence
PEAK001506	chr2L:19572565-19572816	distal	exon;intron	iDRRE	iDRRE	flat	concordant	marked	marked	marked	presence
PEAK001507	chr2L:19573023-19573196	distal	intron	discordant	iDRRE	flat	concordant	marked	marked	marked	presence
PEAK001508	chr2L:19573282-19573480	distal	intron	iDRRE	flat	lower_peak	concordant	marked	marked	marked	presence
PEAK001509	chr2L:19575104-19575732	first-intron	exon;intron	flat	iDRRE	lower_peak	concordant	marked	marked	marked	presence
PEAK001510	chr2L:19576009-19576354	first-intron	intron	flat	iDRRE	flat	concordant	marked	marked	marked	presence
PEAK001511	chr2L:19580310-19580525	core-promoter	exon;intergenic	flat	flat	flat	concordant	marked	marked	not_marked	presence
PEAK001512	chr2L:19582423-19582556	core-promoter	exon;intergenic	flat	flat	lower_peak	concordant	marked	marked	marked	presence
PEAK001513	chr2L:19584203-19584291	core-promoter	exon;intergenic	discordant	discordant	no_peak	concordant	marked	marked	not_marked	presence
PEAK001514	chr2L:19587150-19587284	first-intron	exon;intron	flat	iDRRE	flat	concordant	not_marked	marked	marked	presence
PEAK001515	chr2L:19612373-19612705	distal	intron	discordant	discordant	lower_peak	concordant	not_marked	not_marked	not_marked	absence
PEAK001516	chr2L:1972668-1973125	proximal	intergenic	flat	flat	flat	concordant	marked	not_marked	marked	presence
PEAK001517	chr2L:19735885-19736108	core-promoter	exon;intergenic	iDRRE	flat	flat	concordant	not_marked	marked	marked	presence
PEAK001518	chr2L:19737359-19737644	proximal	intergenic	iDRRE	flat	iDRRE	concordant	not_marked	not_marked	not_marked	absence
PEAK001519	chr2L:1974047-1974167	core-promoter	exon	no_peak	discordant	discordant	concordant	not_marked	marked	marked	presence
PEAK001520	chr2L:19740768-19740894	proximal	exon;intergenic	discordant	discordant	discordant	concordant	not_marked	marked	not_marked	presence
PEAK001521	chr2L:19742420-19742636	core-promoter	exon;intergenic	flat	flat	flat	concordant	not_marked	not_marked	not_marked	absence
PEAK001522	chr2L:19756577-19756695	proximal	exon	flat	discordant	flat	concordant	marked	marked	marked	presence
PEAK001523	chr2L:19756816-19757030	core-promoter	exon;intergenic	iDRRE	flat	flat	concordant	marked	marked	marked	presence
PEAK001524	chr2L:19763236-19763473	proximal	exon;intron	discordant	flat	discordant	concordant	not_marked	marked	marked	presence
PEAK001525	chr2L:19763995-19764290	core-promoter	exon;intron;intergenic	flat	flat	flat	concordant	not_marked	marked	marked	presence
PEAK001526	chr2L:19764560-19764840	proximal	intergenic	flat	flat	flat	concordant	not_marked	marked	marked	presence
PEAK001527	chr2L:19790227-19790523	proximal	intron	discordant	discordant	iDRRE	concordant	not_marked	not_marked	not_marked	absence
PEAK001528	chr2L:19790982-19791416	first-intron	exon;intron	flat	flat	flat	concordant	not_marked	marked	marked	presence
PEAK001529	chr2L:19791549-19791953	core-promoter	intron;intergenic;exon	iDRRE	flat	flat	concordant	not_marked	marked	marked	presence
PEAK001530	chr2L:1979404-1979533	proximal	intron	discordant	discordant	flat	concordant	marked	marked	marked	presence
PEAK001531	chr2L:19795765-19795931	core-promoter	exon;intergenic	flat	lower_peak	iDRRE	concordant	marked	marked	marked	presence
PEAK001532	chr2L:1980721-1980853	core-promoter	exon;intergenic	discordant	flat	flat	concordant	marked	marked	marked	presence
PEAK001533	chr2L:19817237-19817479	distal	intron	iDRRE	flat	iDRRE	concordant	not_marked	not_marked	not_marked	absence
PEAK001534	chr2L:1982102-1982241	core-promoter	intergenic;exon	iDRRE	flat	flat	concordant	marked	marked	marked	presence
PEAK001535	chr2L:19865355-19865517	distal	intron	discordant	flat	higher_peak	concordant	not_marked	not_marked	marked	presence
PEAK001536	chr2L:19865685-19866114	distal	intron	flat	flat	flat	concordant	not_marked	not_marked	marked	presence
PEAK001537	chr2L:19869432-19869986	distal	intron	flat	iDRRE	flat	concordant	marked	marked	marked	presence
PEAK001538	chr2L:1987333-1987878	core-promoter	exon;intron;intergenic	flat	flat	flat	concordant	marked	marked	marked	presence
PEAK001539	chr2L:1988174-1988538	core-promoter	exon;intergenic	iDRRE	iDRRE	flat	concordant	marked	marked	marked	presence
PEAK001540	chr2L:19887522-19887762	distal	intron	flat	flat	flat	concordant	marked	marked	not_marked	presence
PEAK001541	chr2L:19895342-19895519	distal	intron	flat	flat	iDRRE	concordant	not_marked	not_marked	marked	presence
PEAK001542	chr2L:19895936-19896208	distal	exon;intron	iDRRE	iDRRE	flat	concordant	not_marked	not_marked	marked	presence
PEAK001543	chr2L:19897084-19897304	distal	intron	iDRRE	discordant	flat	concordant	not_marked	not_marked	not_marked	absence
PEAK001544	chr2L:19904545-19905305	distal	intron	flat	flat	iDRRE	concordant	not_marked	marked	not_marked	presence
PEAK001545	chr2L:19905497-19906226	distal	intron	flat	flat	flat	concordant	not_marked	marked	not_marked	presence
PEAK001546	chr2L:19916313-19916469	distal	intron	iDRRE	flat	discordant	concordant	not_marked	not_marked	not_marked	absence
PEAK001547	chr2L:19916896-19917480	distal	intron	iDRRE	flat	flat	concordant	not_marked	marked	marked	presence
PEAK001548	chr2L:19917834-19918139	proximal	intron	flat	flat	flat	concordant	not_marked	marked	marked	presence
PEAK001549	chr2L:19934835-19935670	proximal	exon;intron	iDRRE	flat	flat	concordant	marked	marked	marked	presence
PEAK001550	chr2L:19941205-19941460	distal	intron	flat	flat	flat	concordant	marked	marked	not_marked	presence
PEAK001551	chr2L:19944321-19944522	distal	intron	flat	discordant	no_peak	concordant	not_marked	not_marked	not_marked	absence
PEAK001552	chr2L:19948176-19948375	distal	intron	discordant	iDRRE	discordant	concordant	not_marked	marked	higher_signal	presence
PEAK001553	chr2L:19949243-19950139	distal	intron	flat	flat	flat	concordant	not_marked	marked	not_marked	presence
PEAK001554	chr2L:19950501-19950912	distal	intron	flat	flat	flat	concordant	not_marked	marked	not_marked	presence
PEAK001555	chr2L:19958569-19958762	core-promoter	exon;intergenic	iDRRE	lower_peak	flat	concordant	not_marked	marked	not_marked	presence
PEAK001556	chr2L:19987068-19987242	distal	intron	discordant	discordant	discordant	concordant	not_marked	not_marked	marked	presence
PEAK001557	chr2L:19987458-19987824	distal	intron	flat	flat	flat	concordant	not_marked	not_marked	marked	presence
PEAK001558	chr2L:19988459-19988740	distal	intron	flat	flat	flat	concordant	marked	marked	not_marked	presence
PEAK001559	chr2L:19989217-19989879	distal	intron	iDRRE	iDRRE	flat	concordant	marked	marked	marked	presence
PEAK001560	chr2L:19990404-19990533	distal	intron	discordant	discordant	discordant	concordant	marked	marked	not_marked	presence
PEAK001561	chr2L:20000153-20000605	core-promoter	exon;intron	iDRRE	iDRRE	iDRRE	concordant	marked	marked	not_marked	presence
PEAK001562	chr2L:20016829-20017075	proximal	exon	iDRRE	flat	discordant	concordant	not_marked	not_marked	marked	presence
PEAK001563	chr2L:20017176-20017434	core-promoter	exon;intergenic	iDRRE	flat	flat	concordant	not_marked	not_marked	marked	presence
PEAK001564	chr2L:20027704-20027919	core-promoter	exon;intergenic	iDRRE	discordant	discordant	concordant	not_marked	not_marked	marked	presence
PEAK001565	chr2L:20060928-20061069	first-intron	exon;intron	iDRRE	flat	iDRRE	concordant	marked	marked	marked	presence
PEAK001566	chr2L:20061440-20061557	core-promoter	exon	iDRRE	flat	flat	concordant	not_marked	marked	not_marked	presence
PEAK001567	chr2L:20065639-20065751	core-promoter	exon;intergenic	discordant	discordant	iDRRE	concordant	marked	marked	marked	presence
PEAK001568	chr2L:20075639-20075804	core-promoter	exon;intergenic	iDRRE	iDRRE	flat	concordant	marked	marked	marked	presence
PEAK001569	chr2L:20082677-20082856	first-intron	exon	flat	flat	discordant	concordant	marked	marked	marked	presence
PEAK001570	chr2L:20084565-20085519	core-promoter	exon;intron	iDRRE	flat	flat	concordant	marked	marked	marked	presence
PEAK001571	chr2L:2009068-2009255	core-promoter	exon;intergenic	flat	flat	flat	concordant	higher_signal	not_marked	not_marked	presence
PEAK001572	chr2L:20091079-20091360	core-promoter	exon;intron;intergenic	iDRRE	lower_peak	flat	concordant	not_marked	marked	marked	presence
PEAK001573	chr2L:20093819-20093916	core-promoter	exon;intergenic	iDRRE	discordant	flat	concordant	not_marked	marked	marked	presence
PEAK001574	chr2L:2009464-2009918	core-promoter	exon;intergenic	flat	flat	iDRRE	concordant	not_marked	marked	not_marked	presence
PEAK001575	chr2L:20104611-20104817	proximal	intergenic	iDRRE	flat	flat	concordant	not_marked	not_marked	marked	presence
PEAK001576	chr2L:2010641-2010785	core-promoter	exon;intron	discordant	discordant	discordant	concordant	not_marked	marked	not_marked	presence
PEAK001577	chr2L:20106653-20106947	distal	intergenic	flat	flat	flat	concordant	not_marked	not_marked	not_marked	absence
PEAK001578	chr2L:2010864-2011029	core-promoter	exon;intron	flat	flat	flat	concordant	not_marked	marked	not_marked	presence
PEAK001579	chr2L:20109372-20109605	distal	intergenic	discordant	flat	flat	concordant	marked	not_marked	marked	presence
PEAK001580	chr2L:20118061-20118276	distal	intergenic	iDRRE	flat	iDRRE	concordant	not_marked	not_marked	not_marked	absence
PEAK001581	chr2L:20120850-20121348	distal	intergenic	iDRRE	iDRRE	iDRRE	concordant	not_marked	higher_signal	marked	presence
PEAK001582	chr2L:2013172-2013336	core-promoter	exon;intron	flat	iDRRE	flat	concordant	not_marked	not_marked	not_marked	absence
PEAK001583	chr2L:2013862-2014098	proximal	intron	flat	flat	iDRRE	concordant	not_marked	not_marked	not_marked	absence
PEAK001584	chr2L:20148432-20148721	distal	intergenic	iDRRE	flat	flat	concordant	not_marked	not_marked	marked	presence
PEAK001585	chr2L:20174996-20175192	distal	intergenic	iDRRE	no_peak	discordant	concordant	not_marked	not_marked	not_marked	absence
PEAK001586	chr2L:20204953-20205389	distal	intergenic	discordant	flat	higher_peak	concordant	not_marked	not_marked	not_marked	absence
PEAK001587	chr2L:20208366-20208731	distal	intergenic	flat	flat	iDRRE	concordant	not_marked	marked	marked	presence
PEAK001588	chr2L:20281865-20282188	distal	intergenic	iDRRE	iDRRE	flat	concordant	not_marked	marked	not_marked	presence
PEAK001589	chr2L:20290874-20291090	distal	intergenic	flat	flat	iDRRE	concordant	not_marked	not_marked	not_marked	absence
PEAK001590	chr2L:20294022-20294200	proximal	intergenic	flat	flat	iDRRE	concordant	not_marked	not_marked	not_marked	absence
PEAK001591	chr2L:20296742-20297262	core-promoter	exon	iDRRE	flat	flat	concordant	marked	marked	not_marked	presence
PEAK001592	chr2L:20310744-20310882	proximal	intergenic	iDRRE	flat	iDRRE	concordant	not_marked	not_marked	marked	presence
PEAK001593	chr2L:20311093-20311261	core-promoter	exon;intergenic	iDRRE	flat	flat	concordant	not_marked	not_marked	marked	presence
PEAK001594	chr2L:2031574-2031793	core-promoter	exon;intergenic	flat	flat	flat	concordant	not_marked	not_marked	not_marked	absence
PEAK001595	chr2L:20326053-20326302	distal	intron	discordant	flat	flat	concordant	not_marked	not_marked	not_marked	absence
PEAK001596	chr2L:20349947-20350128	core-promoter	exon;intergenic	iDRRE	flat	flat	concordant	marked	marked	marked	presence
PEAK001597	chr2L:20350359-20350513	core-promoter	exon;intergenic	iDRRE	flat	flat	concordant	marked	marked	marked	presence
PEAK001598	chr2L:20352262-20353080	first-intron	intron	iDRRE	flat	flat	concordant	marked	marked	not_marked	presence
PEAK001599	chr2L:20365609-20365845	distal	intergenic	no_peak	discordant	discordant	concordant	not_marked	not_marked	marked	presence
PEAK001600	chr2L:2037531-2037777	core-promoter	exon;intergenic	flat	flat	iDRRE	concordant	not_marked	marked	marked	presence
PEAK001601	chr2L:2037857-2038461	first-intron	exon;intron	iDRRE	flat	flat	concordant	not_marked	marked	marked	presence
PEAK001602	chr2L:20381658-20381979	first-intron	exon;intron	discordant	iDRRE	iDRRE	concordant	marked	not_marked	marked	presence
PEAK001603	chr2L:20382208-20382442	core-promoter	exon;intergenic	flat	flat	flat	concordant	marked	not_marked	marked	presence
PEAK001604	chr2L:20399386-20399538	first-intron	exon;intron	higher_peak	iDRRE	iDRRE	concordant	not_marked	higher_signal	not_marked	presence
PEAK001605	chr2L:20416702-20416852	core-promoter	exon	iDRRE	flat	flat	concordant	marked	marked	marked	presence
PEAK001606	chr2L:20417016-20417547	core-promoter	exon;intergenic	flat	flat	flat	concordant	marked	marked	marked	presence
PEAK001607	chr2L:20427543-20427639	first-intron	intron	discordant	discordant	discordant	concordant	not_marked	not_marked	not_marked	absence
PEAK001608	chr2L:20428475-20428572	first-intron	intron	higher_peak	no_peak	discordant	concordant	not_marked	marked	marked	presence
PEAK001609	chr2L:20428803-20429499	first-intron	exon;intron	iDRRE	flat	flat	concordant	not_marked	marked	marked	presence
PEAK001610	chr2L:20433693-20433925	distal	intron	discordant	flat	discordant	concordant	not_marked	not_marked	not_marked	absence
PEAK001611	chr2L:20434699-20435129	distal	intron	flat	flat	flat	concordant	not_marked	not_marked	not_marked	absence
PEAK001612	chr2L:20435601-20435844	distal	intron	iDRRE	flat	discordant	concordant	not_marked	not_marked	not_marked	absence
PEAK001613	chr2L:2045352-2045546	core-promoter	exon;intergenic	iDRRE	flat	iDRRE	concordant	marked	marked	marked	presence
PEAK001614	chr2L:20458996-20459135	core-promoter	exon;intergenic	iDRRE	discordant	flat	concordant	marked	marked	not_marked	presence
PEAK001615	chr2L:20459262-20459405	core-promoter	exon;intergenic	flat	lower_peak	flat	concordant	marked	marked	not_marked	presence
PEAK001616	chr2L:20463332-20463536	core-promoter	exon;intergenic	discordant	flat	iDRRE	concordant	marked	marked	marked	presence
PEAK001617	chr2L:20464511-20464631	proximal	exon	discordant	flat	discordant	concordant	not_marked	higher_signal	not_marked	presence
PEAK001618	chr2L:20478537-20478894	core-promoter	exon;intron	discordant	flat	discordant	concordant	not_marked	not_marked	not_marked	absence
PEAK001619	chr2L:20486533-20486793	proximal	exon	discordant	discordant	no_peak	concordant	not_marked	marked	marked	presence
PEAK001620	chr2L:20636621-20636809	distal	intergenic	higher_peak	discordant	discordant	concordant	not_marked	not_marked	marked	presence
PEAK001621	chr2L:20638166-20638749	proximal	intergenic	flat	flat	flat	concordant	marked	marked	marked	presence
PEAK001622	chr2L:20645361-20645527	first-intron	exon;intron	iDRRE	lower_peak	iDRRE	concordant	not_marked	marked	marked	presence
PEAK001623	chr2L:20645718-20645869	core-promoter	exon;intergenic	iDRRE	flat	flat	concordant	marked	marked	marked	presence
PEAK001624	chr2L:20650082-20650346	core-promoter	exon;intergenic	flat	flat	flat	concordant	not_marked	marked	marked	presence
PEAK001625	chr2L:20656121-20656226	core-promoter	exon;intergenic	discordant	discordant	higher_peak	concordant	marked	marked	marked	presence
PEAK001626	chr2L:20675957-20676053	core-promoter	exon;intergenic	flat	discordant	discordant	concordant	marked	marked	marked	presence
PEAK001627	chr2L:20681653-20681977	core-promoter	exon;intergenic	iDRRE	discordant	discordant	concordant	marked	marked	marked	presence
PEAK001628	chr2L:20682304-20682486	core-promoter	exon;intergenic	iDRRE	flat	flat	concordant	marked	marked	marked	presence
PEAK001629	chr2L:20692983-20693124	first-intron	intron	discordant	discordant	no_peak	concordant	marked	marked	not_marked	presence
PEAK001630	chr2L:20694858-20695598	first-intron	intron	iDRRE	flat	flat	concordant	not_marked	marked	not_marked	presence
PEAK001631	chr2L:20697083-20697274	first-intron	intron	discordant	flat	flat	concordant	marked	not_marked	not_marked	presence
PEAK001632	chr2L:20698047-20698191	first-intron	intron	discordant	discordant	discordant	concordant	not_marked	not_marked	not_marked	absence
PEAK001633	chr2L:20700213-20700677	first-intron	intron	flat	flat	flat	concordant	marked	marked	not_marked	presence
PEAK001634	chr2L:20700839-20701246	first-intron	intron	flat	iDRRE	flat	concordant	marked	marked	not_marked	presence
PEAK001635	chr2L:20701942-20702126	first-intron	intron	discordant	iDRRE	discordant	concordant	not_marked	marked	not_marked	presence
PEAK001636	chr2L:20706731-20706993	first-intron	intron	discordant	iDRRE	flat	concordant	not_marked	not_marked	marked	presence
PEAK001637	chr2L:20708226-20708711	first-intron	intron	flat	iDRRE	flat	concordant	marked	not_marked	not_marked	presence
PEAK001638	chr2L:20710336-20710520	first-intron	exon	discordant	flat	flat	concordant	not_marked	not_marked	not_marked	absence
PEAK001639	chr2L:20715997-20716743	proximal	intergenic	flat	iDRRE	flat	concordant	marked	marked	marked	presence
PEAK001640	chr2L:207254-208053	core-promoter	exon;intron	flat	flat	flat	concordant	marked	marked	marked	presence
PEAK001641	chr2L:20734241-20734383	core-promoter	exon;intergenic	iDRRE	flat	iDRRE	concordant	not_marked	marked	marked	presence
PEAK001642	chr2L:20735295-20735738	proximal	exon;intron	iDRRE	flat	flat	concordant	marked	marked	marked	presence
PEAK001643	chr2L:20758053-20758883	core-promoter	intergenic;intron;exon	flat	flat	flat	concordant	marked	marked	marked	presence
PEAK001644	chr2L:20758053-20758886	core-promoter	intergenic;intron;exon	flat	flat	flat	concordant	marked	marked	marked	presence
PEAK001645	chr2L:20759382-20759650	first-intron	intron	iDRRE	flat	flat	concordant	not_marked	marked	not_marked	presence
PEAK001646	chr2L:20770430-20770687	core-promoter	intergenic	iDRRE	iDRRE	flat	concordant	marked	higher_signal	marked	presence
PEAK001647	chr2L:20776998-20777386	distal	intron	higher_peak	discordant	flat	concordant	marked	not_marked	not_marked	presence
PEAK001648	chr2L:20783162-20783441	distal	intergenic	flat	flat	flat	concordant	not_marked	not_marked	not_marked	absence
PEAK001649	chr2L:20787458-20787724	core-promoter	exon;intergenic	iDRRE	flat	flat	concordant	marked	marked	marked	presence
PEAK001650	chr2L:20793587-20793797	proximal	intron	flat	flat	flat	concordant	not_marked	marked	marked	presence
PEAK001651	chr2L:20793944-20794351	proximal	exon;intron	flat	iDRRE	flat	concordant	not_marked	marked	marked	presence
PEAK001652	chr2L:20794614-20794905	core-promoter	exon;intron	iDRRE	iDRRE	flat	concordant	not_marked	marked	marked	presence
PEAK001653	chr2L:20797615-20797796	core-promoter	exon;intergenic	flat	flat	lower_peak	concordant	not_marked	not_marked	not_marked	absence
PEAK001654	chr2L:20798391-20798597	first-intron	exon;intron	discordant	discordant	flat	concordant	not_marked	not_marked	higher_signal	presence
PEAK001655	chr2L:20799713-20800051	first-intron	intron	flat	iDRRE	flat	concordant	marked	marked	marked	presence
PEAK001656	chr2L:20800184-20800525	first-intron	intron	flat	iDRRE	flat	concordant	marked	marked	marked	presence
PEAK001657	chr2L:20800608-20800836	first-intron	intron	flat	flat	flat	concordant	not_marked	marked	higher_signal	presence
PEAK001658	chr2L:20802067-20802358	first-intron	intron	iDRRE	discordant	flat	concordant	not_marked	marked	not_marked	presence
PEAK001659	chr2L:20802677-20802957	first-intron	intron	flat	iDRRE	flat	concordant	not_marked	marked	not_marked	presence
PEAK001660	chr2L:20803922-20804143	first-intron	intron	flat	discordant	flat	concordant	not_marked	marked	not_marked	presence
PEAK001661	chr2L:20809883-20810043	first-intron	exon;intron	discordant	discordant	discordant	concordant	not_marked	marked	not_marked	presence
PEAK001662	chr2L:20821703-20822263	proximal	intergenic	flat	iDRRE	flat	concordant	marked	marked	marked	presence
PEAK001663	chr2L:20822705-20823146	core-promoter	exon;intergenic	flat	flat	flat	concordant	marked	marked	marked	presence
PEAK001664	chr2L:20823572-20824115	first-intron	intron;exon	flat	flat	flat	concordant	marked	marked	marked	presence
PEAK001665	chr2L:20825236-20825662	distal	exon;intron	iDRRE	flat	flat	concordant	marked	marked	marked	presence
PEAK001666	chr2L:20829528-20829641	core-promoter	exon;intergenic	discordant	discordant	discordant	concordant	marked	marked	marked	presence
PEAK001667	chr2L:20829968-20830172	first-intron	exon;intron	flat	iDRRE	flat	concordant	marked	marked	marked	presence
PEAK001668	chr2L:20792-20969	proximal	exon;intron	iDRRE	discordant	flat	concordant	not_marked	not_marked	not_marked	absence
PEAK001669	chr2L:20835646-20835812	core-promoter	exon	discordant	flat	flat	concordant	marked	marked	higher_signal	presence
PEAK001670	chr2L:20840462-20840751	core-promoter	exon;intergenic	iDRRE	flat	flat	concordant	not_marked	not_marked	not_marked	absence
PEAK001671	chr2L:20858557-20858706	core-promoter	exon;intergenic	flat	flat	flat	concordant	not_marked	marked	marked	presence
PEAK001672	chr2L:20859041-20859326	first-intron	exon;intron	discordant	discordant	discordant	concordant	not_marked	marked	marked	presence
PEAK001673	chr2L:20859742-20859891	proximal	exon	discordant	discordant	discordant	concordant	not_marked	marked	marked	presence
PEAK001674	chr2L:20864700-20864848	proximal	intergenic	discordant	discordant	discordant	concordant	not_marked	marked	not_marked	presence
PEAK001675	chr2L:20865006-20865236	core-promoter	exon;intergenic	iDRRE	lower_peak	flat	concordant	not_marked	marked	not_marked	presence
PEAK001676	chr2L:20869024-20869210	proximal	exon;intron	flat	flat	flat	concordant	not_marked	not_marked	not_marked	absence
PEAK001677	chr2L:20885251-20886045	distal	exon;intron	flat	iDRRE	flat	concordant	marked	marked	marked	presence
PEAK001678	chr2L:20889000-20889276	distal	intron	flat	flat	flat	concordant	marked	marked	not_marked	presence
PEAK001679	chr2L:20890249-20890586	distal	exon;intron	iDRRE	iDRRE	flat	concordant	not_marked	higher_signal	marked	presence
PEAK001680	chr2L:20891215-20891416	distal	intron	flat	iDRRE	iDRRE	concordant	not_marked	higher_signal	not_marked	presence
PEAK001681	chr2L:20903014-20903359	proximal	exon;intron	flat	flat	flat	concordant	not_marked	not_marked	not_marked	absence
PEAK001682	chr2L:20908030-20908190	distal	intron	higher_peak	no_peak	discordant	concordant	not_marked	marked	not_marked	presence
PEAK001683	chr2L:20911129-20911690	distal	intron	flat	flat	flat	concordant	not_marked	marked	not_marked	presence
PEAK001684	chr2L:20912589-20913040	distal	intron	iDRRE	flat	flat	concordant	not_marked	marked	not_marked	presence
PEAK001685	chr2L:20913244-20913420	distal	intron	discordant	discordant	discordant	concordant	not_marked	marked	not_marked	presence
PEAK001686	chr2L:20917004-20917229	first-intron	exon	discordant	flat	flat	concordant	not_marked	not_marked	not_marked	absence
PEAK001687	chr2L:20918016-20918102	first-intron	intron	no_peak	discordant	discordant	concordant	not_marked	not_marked	not_marked	absence
PEAK001688	chr2L:20918351-20918503	first-intron	intron	discordant	flat	flat	concordant	not_marked	not_marked	not_marked	absence
PEAK001689	chr2L:20918845-20919026	core-promoter	exon;intergenic	iDRRE	flat	flat	concordant	not_marked	not_marked	not_marked	absence
PEAK001690	chr2L:20922821-20923063	core-promoter	exon;intergenic	iDRRE	iDRRE	flat	concordant	not_marked	not_marked	marked	presence
PEAK001691	chr2L:20926088-20926217	core-promoter	exon;intergenic	iDRRE	flat	flat	concordant	marked	marked	marked	presence
PEAK001692	chr2L:20927799-20927945	core-promoter	exon;intergenic	iDRRE	flat	flat	concordant	not_marked	marked	not_marked	presence
PEAK001693	chr2L:20940455-20940635	distal	intergenic	discordant	discordant	discordant	concordant	not_marked	not_marked	not_marked	absence
PEAK001694	chr2L:20941212-20941390	distal	intergenic	discordant	discordant	flat	concordant	not_marked	not_marked	not_marked	absence
PEAK001695	chr2L:20944749-20945340	distal	intergenic	flat	flat	flat	concordant	not_marked	marked	not_marked	presence
PEAK001696	chr2L:20956198-20956841	distal	intergenic	flat	flat	flat	concordant	not_marked	marked	not_marked	presence
PEAK001697	chr2L:20957169-20957778	distal	intergenic	flat	flat	flat	concordant	marked	marked	marked	presence
PEAK001698	chr2L:20965157-20965545	distal	exon;intergenic	flat	iDRRE	flat	concordant	not_marked	marked	marked	presence
PEAK001699	chr2L:20968006-20968152	distal	intron	discordant	discordant	discordant	concordant	marked	marked	not_marked	presence
PEAK001700	chr2L:20969312-20969587	distal	exon;intron	flat	flat	iDRRE	concordant	not_marked	marked	not_marked	presence
PEAK001701	chr2L:20970737-20971263	distal	intron	flat	flat	flat	concordant	not_marked	marked	not_marked	presence
PEAK001702	chr2L:20974140-20974421	distal	intron	discordant	discordant	no_peak	concordant	marked	marked	not_marked	presence
PEAK001703	chr2L:20974546-20974647	distal	intron	discordant	no_peak	discordant	concordant	marked	marked	not_marked	presence
PEAK001704	chr2L:20975650-20975892	distal	intron	flat	flat	discordant	concordant	not_marked	not_marked	higher_signal	presence
PEAK001705	chr2L:20982136-20982318	distal	intron	discordant	discordant	flat	concordant	not_marked	marked	not_marked	presence
PEAK001706	chr2L:20997814-20998365	distal	intron	iDRRE	iDRRE	iDRRE	concordant	not_marked	marked	not_marked	presence
PEAK001707	chr2L:20999767-20999884	distal	intron	discordant	discordant	discordant	concordant	not_marked	marked	not_marked	presence
PEAK001708	chr2L:21004166-21004372	distal	intron	discordant	discordant	flat	concordant	marked	marked	marked	presence
PEAK001709	chr2L:21008275-21008677	distal	intron	iDRRE	flat	flat	concordant	not_marked	not_marked	marked	presence
PEAK001710	chr2L:21008968-21009497	distal	intron	flat	iDRRE	flat	concordant	not_marked	marked	marked	presence
PEAK001711	chr2L:21009622-21009916	distal	intron	flat	iDRRE	flat	concordant	not_marked	marked	marked	presence
PEAK001712	chr2L:21011626-21011806	distal	intron	flat	discordant	flat	concordant	not_marked	not_marked	not_marked	absence
PEAK001713	chr2L:21013589-21013754	distal	intron	discordant	discordant	discordant	concordant	not_marked	not_marked	not_marked	absence
PEAK001714	chr2L:21015335-21015694	distal	intron	discordant	flat	flat	concordant	marked	marked	not_marked	presence
PEAK001715	chr2L:21017654-21018740	distal	intron	flat	flat	flat	concordant	not_marked	not_marked	not_marked	absence
PEAK001716	chr2L:21019583-21020152	distal	exon;intron	iDRRE	flat	flat	concordant	not_marked	marked	marked	presence
PEAK001717	chr2L:21023966-21024585	distal	intron	flat	flat	flat	concordant	not_marked	marked	not_marked	presence
PEAK001718	chr2L:21028095-21028430	distal	intron	flat	iDRRE	flat	concordant	not_marked	marked	higher_signal	presence
PEAK001719	chr2L:21029993-21030399	distal	intron	flat	iDRRE	flat	concordant	not_marked	not_marked	not_marked	absence
PEAK001720	chr2L:21030646-21031232	distal	intron	iDRRE	flat	flat	concordant	not_marked	marked	not_marked	presence
PEAK001721	chr2L:21050147-21050406	proximal	intron	flat	flat	flat	concordant	marked	marked	not_marked	presence
PEAK001722	chr2L:21051897-21052278	core-promoter	exon;intergenic	flat	flat	flat	concordant	not_marked	marked	marked	presence
PEAK001723	chr2L:21061575-21061748	distal	intron	discordant	flat	flat	concordant	not_marked	marked	not_marked	presence
PEAK001724	chr2L:21063094-21063315	distal	intron	discordant	discordant	discordant	concordant	not_marked	not_marked	not_marked	absence
PEAK001725	chr2L:21064862-21065492	distal	intron	iDRRE	flat	flat	concordant	not_marked	marked	higher_signal	presence
PEAK001726	chr2L:21065875-21066066	distal	intron	flat	iDRRE	flat	concordant	not_marked	marked	higher_signal	presence
PEAK001727	chr2L:21068540-21068854	distal	intron	iDRRE	flat	flat	concordant	not_marked	marked	marked	presence
PEAK001728	chr2L:21069821-21070106	proximal	exon	flat	flat	flat	concordant	marked	marked	marked	presence
PEAK001729	chr2L:21070732-21071093	proximal	exon;intron	flat	flat	flat	concordant	not_marked	not_marked	not_marked	absence
PEAK001730	chr2L:21071458-21071685	core-promoter	exon;intergenic	flat	iDRRE	flat	concordant	not_marked	not_marked	not_marked	absence
PEAK001731	chr2L:21072313-21072455	proximal	intergenic	discordant	discordant	flat	concordant	not_marked	not_marked	not_marked	absence
PEAK001732	chr2L:21078027-21078165	distal	exon;intron	flat	flat	flat	concordant	marked	not_marked	not_marked	presence
PEAK001733	chr2L:21092802-21093164	first-intron	intron	higher_peak	discordant	flat	concordant	not_marked	marked	marked	presence
PEAK001734	chr2L:21096655-21096943	core-promoter	exon;intron	iDRRE	flat	flat	concordant	marked	not_marked	marked	presence
PEAK001735	chr2L:21102366-21102501	core-promoter	exon;intergenic	iDRRE	flat	flat	concordant	not_marked	marked	marked	presence
PEAK001736	chr2L:21102638-21102798	core-promoter	exon	flat	flat	iDRRE	concordant	not_marked	marked	marked	presence
PEAK001737	chr2L:21107637-21107798	first-intron	exon;intron	iDRRE	flat	flat	concordant	not_marked	not_marked	not_marked	absence
PEAK001738	chr2L:21108043-21108259	proximal	exon;intron	flat	flat	flat	concordant	not_marked	not_marked	not_marked	absence
PEAK001739	chr2L:21109144-21109320	proximal	intron	discordant	discordant	discordant	concordant	not_marked	not_marked	not_marked	absence
PEAK001740	chr2L:21130575-21130767	distal	exon	iDRRE	iDRRE	flat	concordant	not_marked	not_marked	not_marked	absence
PEAK001741	chr2L:21141823-21141966	proximal	exon	flat	discordant	iDRRE	concordant	not_marked	marked	not_marked	presence
PEAK001742	chr2L:21142286-21142495	core-promoter	exon;intergenic	iDRRE	flat	flat	concordant	not_marked	marked	not_marked	presence
PEAK001743	chr2L:21143064-21143324	core-promoter	exon;intergenic	iDRRE	lower_peak	flat	concordant	not_marked	marked	marked	presence
PEAK001744	chr2L:21147013-21147190	proximal	exon	discordant	discordant	flat	concordant	not_marked	not_marked	not_marked	absence
PEAK001745	chr2L:21148337-21148504	core-promoter	exon	iDRRE	flat	iDRRE	concordant	higher_signal	marked	not_marked	presence
PEAK001746	chr2L:21149133-21149288	proximal	intergenic	iDRRE	flat	iDRRE	concordant	not_marked	higher_signal	higher_signal	presence
PEAK001747	chr2L:21153953-21154145	distal	intergenic	iDRRE	flat	flat	concordant	not_marked	not_marked	not_marked	absence
PEAK001748	chr2L:21156170-21156324	core-promoter	exon	iDRRE	flat	flat	concordant	marked	marked	marked	presence
PEAK001749	chr2L:21156786-21156904	core-promoter	exon	discordant	no_peak	flat	concordant	marked	marked	marked	presence
PEAK001750	chr2L:21158812-21158959	core-promoter	exon;intron;intergenic	discordant	discordant	flat	concordant	marked	marked	marked	presence
PEAK001751	chr2L:21162948-21163163	core-promoter	exon;intergenic	iDRRE	flat	flat	concordant	marked	marked	marked	presence
PEAK001752	chr2L:21163564-21163682	core-promoter	exon;intergenic	discordant	discordant	iDRRE	concordant	not_marked	marked	marked	presence
PEAK001753	chr2L:21166601-21166718	proximal	exon	flat	flat	discordant	concordant	marked	marked	not_marked	presence
PEAK001754	chr2L:21168266-21168405	proximal	exon	flat	discordant	flat	concordant	marked	marked	marked	presence
PEAK001755	chr2L:21168539-21168740	core-promoter	exon	flat	iDRRE	flat	concordant	not_marked	marked	marked	presence
PEAK001756	chr2L:21169022-21169204	first-intron	intron	discordant	flat	discordant	concordant	not_marked	marked	marked	presence
PEAK001757	chr2L:21178572-21178763	first-intron	exon	flat	iDRRE	flat	concordant	not_marked	marked	marked	presence
PEAK001758	chr2L:21178878-21179112	first-intron	exon	iDRRE	flat	flat	concordant	not_marked	marked	marked	presence
PEAK001759	chr2L:21179886-21179982	core-promoter	exon;intergenic	discordant	discordant	flat	concordant	marked	marked	marked	presence
PEAK001760	chr2L:21196784-21197333	first-intron	intron	flat	flat	flat	concordant	not_marked	marked	marked	presence
PEAK001761	chr2L:21206282-21206445	core-promoter	intergenic	no_peak	discordant	discordant	concordant	not_marked	not_marked	not_marked	absence
PEAK001762	chr2L:21214911-21215383	first-intron	intron	flat	flat	flat	concordant	marked	not_marked	marked	presence
PEAK001763	chr2L:21218492-21218720	core-promoter	intron;exon	iDRRE	flat	flat	concordant	marked	marked	marked	presence
PEAK001764	chr2L:21220533-21220644	core-promoter	exon;intergenic	iDRRE	flat	iDRRE	concordant	not_marked	marked	not_marked	presence
PEAK001765	chr2L:21221156-21221367	core-promoter	exon;intergenic	iDRRE	flat	iDRRE	concordant	marked	marked	marked	presence
PEAK001766	chr2L:21221901-21222114	first-intron	intron	iDRRE	flat	flat	concordant	marked	marked	marked	presence
PEAK001767	chr2L:21237082-21237555	core-promoter	exon;intron;intergenic	iDRRE	flat	flat	concordant	not_marked	marked	marked	presence
PEAK001768	chr2L:21237679-21238231	first-intron	intron	iDRRE	flat	flat	concordant	not_marked	marked	marked	presence
PEAK001769	chr2L:21240033-21240240	distal	intron	iDRRE	flat	flat	concordant	not_marked	marked	not_marked	presence
PEAK001770	chr2L:21243806-21244472	distal	intron	iDRRE	flat	flat	concordant	not_marked	marked	marked	presence
PEAK001771	chr2L:21245100-21245701	distal	intron	iDRRE	iDRRE	flat	concordant	marked	marked	not_marked	presence
PEAK001772	chr2L:21248905-21249201	distal	intron	flat	flat	flat	concordant	not_marked	not_marked	not_marked	absence
PEAK001773	chr2L:21250460-21250619	distal	intron	discordant	discordant	discordant	concordant	not_marked	not_marked	not_marked	absence
PEAK001774	chr2L:21250732-21251187	distal	intron	iDRRE	flat	flat	concordant	not_marked	not_marked	not_marked	absence
PEAK001775	chr2L:21251829-21252002	distal	intron	flat	flat	flat	concordant	not_marked	not_marked	not_marked	absence
PEAK001776	chr2L:21255579-21255734	distal	exon	discordant	discordant	discordant	concordant	marked	marked	not_marked	presence
PEAK001777	chr2L:21260973-21261314	core-promoter	exon;intergenic	iDRRE	lower_peak	flat	concordant	not_marked	marked	marked	presence
PEAK001778	chr2L:21262830-21263023	core-promoter	exon;intergenic	iDRRE	flat	flat	concordant	not_marked	marked	not_marked	presence
PEAK001779	chr2L:21263485-21263711	first-intron	exon;intron	flat	flat	flat	concordant	not_marked	marked	not_marked	presence
PEAK001780	chr2L:2127461-2127795	proximal	exon	iDRRE	flat	flat	concordant	not_marked	not_marked	not_marked	absence
PEAK001781	chr2L:21293255-21293631	distal	intron	iDRRE	flat	flat	concordant	not_marked	not_marked	not_marked	absence
PEAK001782	chr2L:21296298-21297100	distal	exon;intron	iDRRE	flat	flat	concordant	not_marked	marked	marked	presence
PEAK001783	chr2L:21267-21484	core-promoter	exon;intergenic	iDRRE	flat	flat	concordant	not_marked	not_marked	not_marked	absence
PEAK001784	chr2L:2130153-2130541	proximal	intergenic	flat	flat	flat	concordant	marked	marked	marked	presence
PEAK001785	chr2L:2130704-2131204	core-promoter	exon;intergenic	flat	flat	flat	concordant	marked	marked	marked	presence
PEAK001786	chr2L:21309222-21309653	proximal	exon	iDRRE	flat	flat	concordant	marked	marked	marked	presence
PEAK001787	chr2L:21309769-21310131	core-promoter	exon;intergenic	flat	flat	flat	concordant	marked	marked	marked	presence
PEAK001788	chr2L:21311063-21311319	first-intron	exon;intron	flat	flat	flat	concordant	not_marked	marked	marked	presence
PEAK001789	chr2L:21312944-21313407	distal	intron	flat	flat	flat	concordant	not_marked	not_marked	not_marked	absence
PEAK001790	chr2L:21314144-21314523	distal	exon;intron	flat	flat	flat	concordant	not_marked	marked	marked	presence
PEAK001791	chr2L:21316836-21316942	distal	intron	discordant	discordant	discordant	concordant	not_marked	not_marked	not_marked	absence
PEAK001792	chr2L:21344205-21344365	proximal	intergenic	iDRRE	flat	iDRRE	concordant	not_marked	marked	marked	presence
PEAK001793	chr2L:21344512-21345313	core-promoter	exon;intergenic;intron	iDRRE	iDRRE	iDRRE	concordant	not_marked	marked	marked	presence
PEAK001794	chr2L:21345707-21345903	first-intron	intron	iDRRE	flat	iDRRE	concordant	not_marked	marked	not_marked	presence
PEAK001795	chr2L:21356183-21356488	distal	exon	flat	iDRRE	flat	concordant	not_marked	marked	not_marked	presence
PEAK001796	chr2L:21367407-21367620	distal	intergenic	iDRRE	flat	flat	concordant	not_marked	not_marked	not_marked	absence
PEAK001797	chr2L:21368767-21369172	first-intron	exon;intron	flat	iDRRE	iDRRE	concordant	not_marked	not_marked	not_marked	absence
PEAK001798	chr2L:21374192-21374642	distal	exon	iDRRE	flat	flat	concordant	marked	marked	higher_signal	presence
PEAK001799	chr2L:21374861-21375657	distal	exon	iDRRE	iDRRE	flat	concordant	marked	marked	higher_signal	presence
PEAK001800	chr2L:21380013-21380200	core-promoter	exon	higher_peak	flat	discordant	concordant	marked	not_marked	marked	presence
PEAK001801	chr2L:21397221-21397551	distal	intergenic	iDRRE	iDRRE	iDRRE	concordant	marked	not_marked	marked	presence
PEAK001802	chr2L:21401422-21401735	distal	intergenic	iDRRE	iDRRE	iDRRE	concordant	not_marked	not_marked	not_marked	absence
PEAK001803	chr2L:21425048-21425199	core-promoter	exon;intergenic	flat	flat	flat	concordant	not_marked	not_marked	not_marked	absence
PEAK001804	chr2L:21433776-21433917	core-promoter	exon;intergenic	flat	flat	lower_peak	concordant	not_marked	not_marked	marked	presence
PEAK001805	chr2L:2145109-2145266	core-promoter	exon;intergenic	flat	flat	flat	concordant	marked	marked	marked	presence
PEAK001806	chr2L:21454247-21454391	core-promoter	exon;intergenic	flat	flat	lower_peak	concordant	not_marked	not_marked	marked	presence
PEAK001807	chr2L:2147133-2147378	core-promoter	exon;intergenic	flat	flat	flat	concordant	marked	marked	marked	presence
PEAK001808	chr2L:21483159-21483298	core-promoter	exon;intergenic	flat	flat	lower_peak	concordant	not_marked	not_marked	marked	presence
PEAK001809	chr2L:2151696-2151801	core-promoter	exon;intergenic	higher_peak	discordant	no_peak	concordant	marked	marked	marked	presence
PEAK001810	chr2L:21518448-21518682	core-promoter	exon;intergenic	iDRRE	flat	flat	concordant	not_marked	not_marked	marked	presence
PEAK001811	chr2L:21528134-21528368	core-promoter	exon;intergenic	iDRRE	flat	flat	concordant	not_marked	not_marked	marked	presence
PEAK001812	chr2L:21529668-21529791	core-promoter	exon;intergenic	iDRRE	discordant	flat	concordant	not_marked	not_marked	marked	presence
PEAK001813	chr2L:21532053-21532161	proximal	exon	discordant	flat	flat	concordant	not_marked	not_marked	marked	presence
PEAK001814	chr2L:21537617-21537737	proximal	exon	iDRRE	flat	lower_peak	concordant	not_marked	not_marked	marked	presence
PEAK001815	chr2L:21540893-21541160	core-promoter	exon;intron;intergenic	flat	flat	lower_peak	concordant	marked	not_marked	marked	presence
PEAK001816	chr2L:21571853-21571950	proximal	intergenic	iDRRE	iDRRE	flat	concordant	not_marked	not_marked	not_marked	absence
PEAK001817	chr2L:21572818-21572963	proximal	intergenic	flat	flat	flat	concordant	not_marked	not_marked	not_marked	absence
PEAK001818	chr2L:21573263-21573499	core-promoter	exon;intergenic	iDRRE	flat	flat	concordant	not_marked	not_marked	not_marked	absence
PEAK001819	chr2L:21573611-21573753	first-intron	intron	discordant	discordant	discordant	concordant	not_marked	not_marked	not_marked	absence
PEAK001820	chr2L:2161222-2161759	distal	exon;intron	flat	iDRRE	lower_peak	concordant	marked	marked	marked	presence
PEAK001821	chr2L:21616315-21616567	distal	exon	iDRRE	flat	flat	concordant	not_marked	not_marked	not_marked	absence
PEAK001822	chr2L:21618721-21618978	first-intron	exon;intron	flat	flat	flat	concordant	not_marked	not_marked	not_marked	absence
PEAK001823	chr2L:21621380-21621566	first-intron	intron	iDRRE	flat	iDRRE	concordant	not_marked	not_marked	not_marked	absence
PEAK001824	chr2L:2162299-2162802	distal	intron	flat	flat	flat	concordant	marked	marked	marked	presence
PEAK001825	chr2L:21623556-21623830	proximal	exon	flat	iDRRE	flat	concordant	not_marked	not_marked	marked	presence
PEAK001826	chr2L:21624119-21624212	core-promoter	intergenic	no_peak	discordant	discordant	concordant	not_marked	not_marked	marked	presence
PEAK001827	chr2L:21628541-21628985	core-promoter	exon;intron	iDRRE	flat	flat	concordant	marked	marked	marked	presence
PEAK001828	chr2L:2162918-2163121	distal	intron	flat	iDRRE	flat	concordant	marked	marked	marked	presence
PEAK001829	chr2L:21629187-21629535	first-intron	intron	flat	flat	flat	concordant	not_marked	marked	marked	presence
PEAK001830	chr2L:21629845-21630070	core-promoter	exon;intergenic	flat	flat	lower_peak	concordant	not_marked	marked	marked	presence
PEAK001831	chr2L:2163503-2163961	distal	intron	flat	flat	flat	concordant	not_marked	marked	not_marked	presence
PEAK001832	chr2L:2164649-2165292	distal	intron	flat	flat	flat	concordant	not_marked	marked	not_marked	presence
PEAK001833	chr2L:21648892-21649064	distal	intergenic	iDRRE	discordant	flat	concordant	not_marked	not_marked	not_marked	absence
PEAK001834	chr2L:21656271-21656361	proximal	intergenic	discordant	discordant	discordant	concordant	not_marked	not_marked	not_marked	absence
PEAK001835	chr2L:21657560-21657690	core-promoter	exon;intergenic	iDRRE	flat	flat	concordant	not_marked	not_marked	not_marked	absence
PEAK001836	chr2L:21676567-21676986	first-intron	intron	flat	flat	flat	concordant	not_marked	marked	not_marked	presence
PEAK001837	chr2L:21677788-21677995	proximal	exon;intergenic	iDRRE	flat	lower_peak	concordant	not_marked	marked	marked	presence
PEAK001838	chr2L:21681875-21682218	core-promoter	exon;intron;intergenic	flat	flat	flat	concordant	not_marked	marked	marked	presence
PEAK001839	chr2L:21683275-21683427	proximal	intergenic	iDRRE	flat	flat	concordant	not_marked	not_marked	not_marked	absence
PEAK001840	chr2L:21683686-21684107	core-promoter	exon;intergenic	iDRRE	flat	flat	concordant	not_marked	not_marked	higher_signal	presence
PEAK001841	chr2L:21730722-21730946	distal	intergenic	iDRRE	flat	flat	concordant	not_marked	not_marked	not_marked	absence
PEAK001842	chr2L:2174428-2174624	first-intron	intron	iDRRE	flat	flat	concordant	not_marked	not_marked	not_marked	absence
PEAK001843	chr2L:21747107-21747356	distal	exon;intron	flat	flat	flat	concordant	marked	marked	not_marked	presence
PEAK001844	chr2L:21748618-21748860	distal	intron	flat	flat	flat	concordant	not_marked	marked	not_marked	presence
PEAK001845	chr2L:2174880-2175090	first-intron	intron	discordant	lower_peak	discordant	concordant	not_marked	not_marked	not_marked	absence
PEAK001846	chr2L:21749020-21749159	distal	intron	discordant	discordant	discordant	concordant	not_marked	marked	not_marked	presence
PEAK001847	chr2L:2175282-2175861	first-intron	intron	iDRRE	iDRRE	flat	concordant	not_marked	marked	not_marked	presence
PEAK001848	chr2L:21752906-21753078	distal	intron	iDRRE	flat	flat	concordant	not_marked	not_marked	marked	presence
PEAK001849	chr2L:21753569-21753969	distal	exon;intron	iDRRE	iDRRE	flat	concordant	not_marked	not_marked	marked	presence
PEAK001850	chr2L:21756689-21756827	first-intron	intron	discordant	discordant	flat	concordant	not_marked	marked	not_marked	presence
PEAK001851	chr2L:21757363-21757557	core-promoter	exon;intergenic	iDRRE	flat	flat	concordant	not_marked	marked	marked	presence
PEAK001852	chr2L:21757933-21758101	core-promoter	exon;intergenic	discordant	discordant	flat	concordant	not_marked	marked	marked	presence
PEAK001853	chr2L:21763560-21764042	distal	intron	iDRRE	iDRRE	flat	concordant	not_marked	marked	not_marked	presence
PEAK001854	chr2L:21765024-21765518	distal	intron	flat	iDRRE	flat	concordant	not_marked	marked	not_marked	presence
PEAK001855	chr2L:21766931-21767103	distal	intron	discordant	discordant	no_peak	concordant	not_marked	marked	not_marked	presence
PEAK001856	chr2L:21770274-21771054	distal	intron	flat	iDRRE	flat	concordant	marked	marked	marked	presence
PEAK001857	chr2L:21778197-21778413	first-intron	intron	flat	flat	flat	concordant	not_marked	not_marked	not_marked	absence
PEAK001858	chr2L:2178084-2178525	proximal	exon	flat	iDRRE	flat	concordant	marked	marked	marked	presence
PEAK001859	chr2L:2178704-2178881	core-promoter	exon;intergenic	iDRRE	iDRRE	flat	concordant	marked	marked	marked	presence
PEAK001860	chr2L:21789291-21789756	first-intron	intron	iDRRE	iDRRE	flat	concordant	not_marked	not_marked	not_marked	absence
PEAK001861	chr2L:21792964-21793115	first-intron	intron	discordant	flat	flat	concordant	not_marked	not_marked	not_marked	absence
PEAK001862	chr2L:21794709-21794861	first-intron	intron	iDRRE	iDRRE	flat	concordant	not_marked	not_marked	higher_signal	presence
PEAK001863	chr2L:21795401-21795538	core-promoter	exon;intergenic	discordant	flat	flat	concordant	not_marked	not_marked	higher_signal	presence
PEAK001864	chr2L:21796367-21797123	proximal	intergenic	flat	iDRRE	flat	concordant	marked	marked	marked	presence
PEAK001865	chr2L:21798158-21798741	proximal	exon	iDRRE	iDRRE	flat	concordant	marked	marked	marked	presence
PEAK001866	chr2L:2179891-2180160	proximal	intergenic	flat	iDRRE	flat	concordant	marked	marked	not_marked	presence
PEAK001867	chr2L:21803129-21803623	distal	intergenic	flat	discordant	discordant	concordant	not_marked	not_marked	not_marked	absence
PEAK001868	chr2L:21804186-21804722	distal	intergenic	flat	flat	flat	concordant	not_marked	marked	higher_signal	presence
PEAK001869	chr2L:21807206-21807646	distal	intergenic	flat	flat	flat	concordant	not_marked	marked	marked	presence
PEAK001870	chr2L:21808405-21808840	distal	intergenic	flat	iDRRE	flat	concordant	not_marked	not_marked	not_marked	absence
PEAK001871	chr2L:21811845-21812180	distal	intergenic	iDRRE	flat	flat	concordant	marked	marked	not_marked	presence
PEAK001872	chr2L:21814414-21814819	distal	intergenic	iDRRE	flat	flat	concordant	not_marked	marked	not_marked	presence
PEAK001873	chr2L:21818416-21818792	proximal	intergenic	flat	discordant	lower_peak	concordant	marked	not_marked	marked	presence
PEAK001874	chr2L:2182048-2182409	core-promoter	exon	iDRRE	flat	flat	concordant	marked	marked	not_marked	presence
PEAK001875	chr2L:21823082-21823372	distal	intergenic	iDRRE	iDRRE	flat	concordant	marked	not_marked	not_marked	presence
PEAK001876	chr2L:21828053-21829150	core-promoter	exon;intergenic	flat	flat	flat	concordant	marked	marked	marked	presence
PEAK001877	chr2L:21839311-21839919	distal	intergenic	iDRRE	flat	flat	concordant	not_marked	marked	not_marked	presence
PEAK001878	chr2L:21840234-21840798	distal	intergenic	flat	iDRRE	flat	concordant	marked	marked	not_marked	presence
PEAK001879	chr2L:21846308-21846470	distal	intergenic	discordant	discordant	flat	concordant	marked	marked	marked	presence
PEAK001880	chr2L:21846758-21847420	distal	intergenic	flat	flat	flat	concordant	marked	marked	marked	presence
PEAK001881	chr2L:21847504-21847987	distal	intergenic	flat	flat	flat	concordant	not_marked	marked	higher_signal	presence
PEAK001882	chr2L:2184965-2185357	proximal	exon	flat	flat	flat	concordant	marked	marked	not_marked	presence
PEAK001883	chr2L:21851550-21851777	distal	intergenic	flat	flat	flat	concordant	not_marked	not_marked	not_marked	absence
PEAK001884	chr2L:21857600-21858063	first-intron	intron	flat	iDRRE	flat	concordant	marked	marked	not_marked	presence
PEAK001885	chr2L:21860545-21861087	first-intron	intron	iDRRE	flat	flat	concordant	marked	marked	marked	presence
PEAK001886	chr2L:21863441-21863934	first-intron	intron	iDRRE	iDRRE	flat	concordant	marked	marked	marked	presence
PEAK001887	chr2L:21866479-21866789	first-intron	intron	flat	flat	flat	concordant	marked	not_marked	not_marked	presence
PEAK001888	chr2L:21868566-21869508	proximal	exon	flat	flat	flat	concordant	marked	marked	not_marked	presence
PEAK001889	chr2L:21873723-21874128	distal	intergenic	discordant	flat	flat	concordant	not_marked	marked	not_marked	presence
PEAK001890	chr2L:21878987-21879546	distal	intergenic	iDRRE	flat	flat	concordant	marked	marked	marked	presence
PEAK001891	chr2L:21879717-21880189	distal	intergenic	flat	flat	flat	concordant	marked	marked	marked	presence
PEAK001892	chr2L:21881014-21881564	distal	intergenic	flat	flat	flat	concordant	not_marked	marked	marked	presence
PEAK001893	chr2L:21881759-21881850	distal	intergenic	flat	discordant	discordant	concordant	not_marked	marked	marked	presence
PEAK001894	chr2L:21882106-21882488	distal	intergenic	flat	flat	flat	concordant	not_marked	marked	not_marked	presence
PEAK001895	chr2L:21886889-21887066	distal	intergenic	flat	discordant	iDRRE	concordant	not_marked	marked	not_marked	presence
PEAK001896	chr2L:21887714-21888084	distal	intergenic	iDRRE	iDRRE	flat	concordant	marked	marked	marked	presence
PEAK001897	chr2L:21890018-21890143	proximal	exon	discordant	no_peak	discordant	concordant	not_marked	not_marked	not_marked	absence
PEAK001898	chr2L:21899235-21899792	proximal	intergenic	flat	flat	flat	concordant	not_marked	not_marked	marked	presence
PEAK001899	chr2L:2192344-2192482	core-promoter	exon;intergenic	iDRRE	flat	flat	concordant	marked	marked	marked	presence
PEAK001900	chr2L:21923557-21924143	distal	intergenic	flat	flat	flat	concordant	marked	marked	not_marked	presence
PEAK001901	chr2L:21934646-21935080	distal	intergenic	flat	flat	iDRRE	concordant	marked	marked	not_marked	presence
PEAK001902	chr2L:2193471-2193838	first-intron	intron	flat	iDRRE	lower_peak	concordant	marked	not_marked	marked	presence
PEAK001903	chr2L:21935728-21935858	distal	intergenic	discordant	discordant	discordant	concordant	not_marked	not_marked	not_marked	absence
PEAK001904	chr2L:21939804-21939969	distal	intergenic	discordant	discordant	discordant	concordant	not_marked	not_marked	not_marked	absence
PEAK001905	chr2L:21950032-21950501	core-promoter	exon	flat	flat	iDRRE	concordant	not_marked	not_marked	not_marked	absence
PEAK001906	chr2L:21954784-21955446	distal	intergenic	flat	flat	flat	concordant	marked	marked	marked	presence
PEAK001907	chr2L:21956727-21956939	proximal	intergenic	flat	flat	iDRRE	concordant	not_marked	not_marked	not_marked	absence
PEAK001908	chr2L:2196468-2197350	first-intron	exon;intron	flat	iDRRE	flat	concordant	marked	not_marked	marked	presence
PEAK001909	chr2L:21969639-21969998	distal	intergenic	discordant	discordant	discordant	concordant	not_marked	not_marked	not_marked	absence
PEAK001910	chr2L:21974966-21975154	distal	exon	higher_peak	discordant	discordant	concordant	not_marked	not_marked	not_marked	absence
PEAK001911	chr2L:2197604-2197988	core-promoter	exon;intergenic	iDRRE	flat	flat	concordant	marked	marked	marked	presence
PEAK001912	chr2L:21979875-21980616	distal	intron	flat	flat	flat	concordant	not_marked	marked	higher_signal	presence
PEAK001913	chr2L:21992608-21992882	core-promoter	exon	discordant	discordant	discordant	concordant	not_marked	marked	not_marked	presence
PEAK001914	chr2L:21993165-21993462	proximal	intergenic	flat	flat	iDRRE	concordant	not_marked	marked	not_marked	presence
PEAK001915	chr2L:21993624-21994099	proximal	intergenic	flat	flat	flat	concordant	not_marked	marked	not_marked	presence
PEAK001916	chr2L:21997267-21997627	distal	intergenic	iDRRE	flat	iDRRE	concordant	not_marked	not_marked	not_marked	absence
PEAK001917	chr2L:21998392-21998475	proximal	intergenic	no_peak	discordant	no_peak	concordant	not_marked	not_marked	not_marked	absence
PEAK001918	chr2L:21999899-22000299	proximal	exon	iDRRE	flat	flat	concordant	not_marked	not_marked	not_marked	absence
PEAK001919	chr2L:2200218-2200593	distal	intergenic	flat	iDRRE	flat	concordant	marked	marked	higher_signal	presence
PEAK001920	chr2L:22005427-22005681	distal	intergenic	discordant	discordant	discordant	concordant	not_marked	not_marked	not_marked	absence
PEAK001921	chr2L:22007736-22007880	distal	intergenic	iDRRE	discordant	discordant	concordant	not_marked	not_marked	not_marked	absence
PEAK001922	chr2L:22008130-22008313	distal	intergenic	flat	flat	iDRRE	concordant	not_marked	not_marked	not_marked	absence
PEAK001923	chr2L:22018622-22019416	core-promoter	intergenic;exon	flat	iDRRE	flat	concordant	not_marked	marked	marked	presence
PEAK001924	chr2L:2202097-2202284	distal	intergenic	discordant	iDRRE	flat	concordant	marked	marked	marked	presence
PEAK001925	chr2L:22024299-22024835	distal	exon	flat	iDRRE	flat	concordant	marked	marked	marked	presence
PEAK001926	chr2L:2202485-2203648	distal	intergenic	flat	flat	flat	concordant	marked	marked	marked	presence
PEAK001927	chr2L:220449-220713	proximal	intron	flat	flat	discordant	concordant	not_marked	not_marked	not_marked	absence
PEAK001928	chr2L:22052817-22052935	proximal	intergenic	discordant	discordant	discordant	concordant	not_marked	higher_signal	not_marked	presence
PEAK001929	chr2L:22099494-22099658	distal	intergenic	no_peak	discordant	flat	concordant	not_marked	not_marked	not_marked	absence
PEAK001930	chr2L:22105016-22105349	first-intron	exon;intron	iDRRE	flat	flat	concordant	not_marked	not_marked	not_marked	absence
PEAK001931	chr2L:22108473-22108696	proximal	intergenic	flat	flat	flat	concordant	not_marked	marked	not_marked	presence
PEAK001932	chr2L:22109400-22110078	proximal	exon	flat	flat	flat	concordant	not_marked	marked	not_marked	presence
PEAK001933	chr2L:22113000-22113268	distal	intergenic	iDRRE	flat	flat	concordant	not_marked	not_marked	not_marked	absence
PEAK001934	chr2L:22117507-22118097	distal	intergenic	flat	flat	flat	concordant	not_marked	marked	not_marked	presence
PEAK001935	chr2L:22118384-22118526	distal	intergenic	lower_peak	flat	discordant	concordant	not_marked	marked	not_marked	presence
PEAK001936	chr2L:22121748-22121914	first-intron	exon;intron	iDRRE	lower_peak	flat	concordant	marked	marked	marked	presence
PEAK001937	chr2L:22121988-22122176	proximal	exon	flat	flat	flat	concordant	marked	marked	marked	presence
PEAK001938	chr2L:22130103-22130213	core-promoter	exon;intergenic	iDRRE	flat	flat	concordant	not_marked	marked	marked	presence
PEAK001939	chr2L:22131267-22131465	core-promoter	exon;intron	iDRRE	flat	iDRRE	concordant	not_marked	marked	not_marked	presence
PEAK001940	chr2L:22133942-22134462	distal	intron;exon	flat	flat	flat	concordant	not_marked	not_marked	marked	presence
PEAK001941	chr2L:2214197-2214328	core-promoter	exon;intergenic	discordant	lower_peak	discordant	concordant	not_marked	marked	not_marked	presence
PEAK001942	chr2L:2216277-2216388	core-promoter	exon;intergenic	iDRRE	flat	discordant	concordant	not_marked	marked	not_marked	presence
PEAK001943	chr2L:22168526-22168775	first-intron	exon;intron	iDRRE	flat	flat	concordant	not_marked	marked	marked	presence
PEAK001944	chr2L:22169064-22169344	core-promoter	exon;intergenic	iDRRE	lower_peak	flat	concordant	not_marked	not_marked	not_marked	absence
PEAK001945	chr2L:2217160-2217380	core-promoter	exon;intergenic	flat	flat	flat	concordant	marked	marked	not_marked	presence
PEAK001946	chr2L:22176430-22176560	first-intron	intron	discordant	discordant	discordant	concordant	not_marked	not_marked	not_marked	absence
PEAK001947	chr2L:22179661-22179935	first-intron	intron	flat	flat	flat	concordant	not_marked	not_marked	not_marked	absence
PEAK001948	chr2L:221907-222625	proximal	exon;intron	flat	iDRRE	flat	concordant	marked	marked	marked	presence
PEAK001949	chr2L:2220669-2220808	core-promoter	exon;intergenic	discordant	flat	discordant	concordant	marked	marked	not_marked	presence
PEAK001950	chr2L:2221104-2221259	first-intron	intron	iDRRE	flat	flat	concordant	not_marked	not_marked	higher_signal	presence
PEAK001951	chr2L:2221903-2222118	first-intron	exon;intron	iDRRE	iDRRE	flat	concordant	not_marked	not_marked	not_marked	absence
PEAK001952	chr2L:2222331-2222569	proximal	intron	iDRRE	flat	flat	concordant	not_marked	not_marked	not_marked	absence
PEAK001953	chr2L:22239772-22239961	core-promoter	exon;intergenic	flat	discordant	iDRRE	concordant	not_marked	marked	not_marked	presence
PEAK001954	chr2L:22247789-22247966	core-promoter	exon;intergenic	iDRRE	lower_peak	iDRRE	concordant	not_marked	marked	marked	presence
PEAK001955	chr2L:22249806-22249944	core-promoter	exon;intergenic	iDRRE	discordant	iDRRE	concordant	not_marked	marked	not_marked	presence
PEAK001956	chr2L:2226733-2227515	core-promoter	exon;intron	flat	flat	flat	concordant	marked	marked	marked	presence
PEAK001957	chr2L:222896-223212	proximal	intron	flat	flat	flat	concordant	marked	marked	marked	presence
PEAK001958	chr2L:22300881-22301099	distal	intergenic	flat	flat	iDRRE	concordant	marked	not_marked	not_marked	presence
PEAK001959	chr2L:22307244-22307371	proximal	intergenic	discordant	discordant	discordant	concordant	not_marked	not_marked	not_marked	absence
PEAK001960	chr2L:22339354-22339450	proximal	intron	flat	flat	iDRRE	concordant	not_marked	not_marked	not_marked	absence
PEAK001961	chr2L:22361168-22361367	distal	intron	iDRRE	flat	flat	concordant	not_marked	marked	not_marked	presence
PEAK001962	chr2L:22361546-22361954	distal	intron	flat	flat	flat	concordant	not_marked	marked	not_marked	presence
PEAK001963	chr2L:223665-224155	proximal	exon	flat	flat	flat	concordant	marked	marked	marked	presence
PEAK001964	chr2L:22366793-22367294	distal	exon;intron	flat	flat	flat	concordant	not_marked	not_marked	not_marked	absence
PEAK001965	chr2L:2236802-2237040	core-promoter	exon;intergenic	flat	flat	flat	concordant	marked	marked	marked	presence
PEAK001966	chr2L:2242176-2242572	core-promoter	exon;intergenic	flat	iDRRE	flat	concordant	marked	not_marked	marked	presence
PEAK001967	chr2L:224306-224703	proximal	exon	flat	flat	flat	concordant	marked	marked	marked	presence
PEAK001968	chr2L:22463004-22463114	distal	intergenic	iDRRE	discordant	discordant	concordant	not_marked	not_marked	not_marked	absence
PEAK001969	chr2L:224904-225611	proximal	intron	flat	iDRRE	flat	concordant	marked	marked	marked	presence
PEAK001970	chr2L:22521906-22522054	distal	intergenic	flat	flat	discordant	concordant	marked	marked	marked	presence
PEAK001971	chr2L:22536605-22536995	core-promoter	exon;intergenic	iDRRE	flat	flat	concordant	not_marked	marked	marked	presence
PEAK001972	chr2L:22538113-22538311	core-promoter	exon	flat	lower_peak	flat	concordant	not_marked	not_marked	not_marked	absence
PEAK001973	chr2L:22549859-22549950	proximal	intergenic	discordant	discordant	discordant	concordant	not_marked	marked	not_marked	presence
PEAK001974	chr2L:22550055-22550374	core-promoter	exon;intergenic	iDRRE	discordant	flat	concordant	not_marked	marked	not_marked	presence
PEAK001975	chr2L:22572406-22572773	distal	intergenic	discordant	flat	discordant	concordant	not_marked	not_marked	not_marked	absence
PEAK001976	chr2L:22578972-22579179	core-promoter	exon;intergenic	iDRRE	flat	flat	concordant	not_marked	not_marked	not_marked	absence
PEAK001977	chr2L:22751363-22751566	first-intron	exon	iDRRE	flat	flat	concordant	not_marked	not_marked	not_marked	absence
PEAK001978	chr2L:22751672-22752031	core-promoter	exon;intron	flat	lower_peak	flat	concordant	not_marked	not_marked	not_marked	absence
PEAK001979	chr2L:22755389-22755564	first-intron	intron	iDRRE	flat	iDRRE	concordant	not_marked	marked	not_marked	presence
PEAK001980	chr2L:22755894-22756082	proximal	exon	flat	flat	flat	concordant	not_marked	marked	not_marked	presence
PEAK001981	chr2L:22756263-22756592	core-promoter	exon;intergenic	flat	flat	flat	concordant	not_marked	marked	not_marked	presence
PEAK001982	chr2L:22765633-22765838	distal	intergenic	iDRRE	lower_peak	flat	concordant	not_marked	marked	not_marked	presence
PEAK001983	chr2L:22798247-22798381	core-promoter	exon;intergenic	iDRRE	discordant	flat	concordant	not_marked	not_marked	not_marked	absence
PEAK001984	chr2L:22981684-22981864	core-promoter	exon;intergenic	iDRRE	flat	flat	concordant	not_marked	marked	marked	presence
PEAK001985	chr2L:22982113-22982556	proximal	exon	flat	flat	flat	concordant	not_marked	marked	marked	presence
PEAK001986	chr2L:23025359-23025689	proximal	exon;intron	iDRRE	flat	flat	concordant	not_marked	marked	not_marked	presence
PEAK001987	chr2L:23025784-23026137	core-promoter	exon;intron;intergenic	iDRRE	discordant	flat	concordant	not_marked	marked	not_marked	presence
PEAK001988	chr2L:23068322-23068500	core-promoter	exon;intergenic	flat	flat	iDRRE	concordant	not_marked	marked	marked	presence
PEAK001989	chr2L:23075561-23075663	distal	intergenic	iDRRE	discordant	iDRRE	concordant	not_marked	not_marked	not_marked	absence
PEAK001990	chr2L:23173051-23173178	core-promoter	exon;intron	flat	discordant	flat	concordant	not_marked	not_marked	not_marked	absence
PEAK001991	chr2L:23174310-23174509	core-promoter	exon;intron;intergenic	iDRRE	flat	iDRRE	concordant	not_marked	not_marked	not_marked	absence
PEAK001992	chr2L:23176095-23176392	proximal	intergenic	iDRRE	lower_peak	flat	concordant	not_marked	not_marked	not_marked	absence
PEAK001993	chr2L:23239176-23239287	core-promoter	exon;intergenic	lower_peak	lower_peak	lower_peak	concordant	marked	marked	marked	presence
PEAK001994	chr2L:23313527-23313719	core-promoter	exon;intergenic	iDRRE	flat	flat	concordant	not_marked	marked	marked	presence
PEAK001995	chr2L:23343621-23343733	distal	intergenic	iDRRE	iDRRE	iDRRE	concordant	marked	marked	marked	presence
PEAK001996	chr2L:23357540-23357643	distal	intergenic	discordant	flat	flat	concordant	marked	not_marked	not_marked	presence
PEAK001997	chr2L:23512793-23513106	distal	intergenic	flat	flat	iDRRE	concordant	marked	not_marked	marked	presence
PEAK001998	chr2L:2357259-2357421	core-promoter	exon;intron	discordant	iDRRE	discordant	concordant	marked	marked	marked	presence
PEAK001999	chr2L:2357581-2357906	proximal	exon;intron	iDRRE	flat	discordant	concordant	not_marked	not_marked	marked	presence
[truncated: 22,536 more rows]
